# Supplementary material
Source: PubMed Central journal article supplement (PMC3916828)
Supplement: NIHMS551539-supplement-1_si_001.pdf [file NIHMS551539-supplement-1_si_001.pdf]

# Supporting Information

## The Design and Synthesis of Alanine-Rich $\alpha$ -Helical Peptides Constrained by an *S,S*-Tetrazine Photochemical Trigger: A Fragment Union Approach

*Joel R. Courter, Mohannad Abdo, Stephen P. Brown, Matthew J. Tucker, Robin M.*

*Hochstrasser, and Amos B. Smith, III\**

Department of Chemistry, University of Pennsylvania, Philadelphia, Pennsylvania 19104, United  
States

## Table of Contents

|                                                                  |    |
|------------------------------------------------------------------|----|
| HPLC and HRMS Characterization of Peptides                       | 3  |
| Enriched $^{13}\text{C}/^{18}\text{O}$ Amide Containing Peptides | 38 |
| <i>S,S</i> -Tetrazine Reduction and Re-oxidation                 | 67 |
| Experimental Evidence for the 1,2-dihydro- <i>S,S</i> -tetrazine | 69 |
| NMR Spectra                                                      | 72 |

## HPLC and HRMS Characterization of Peptides

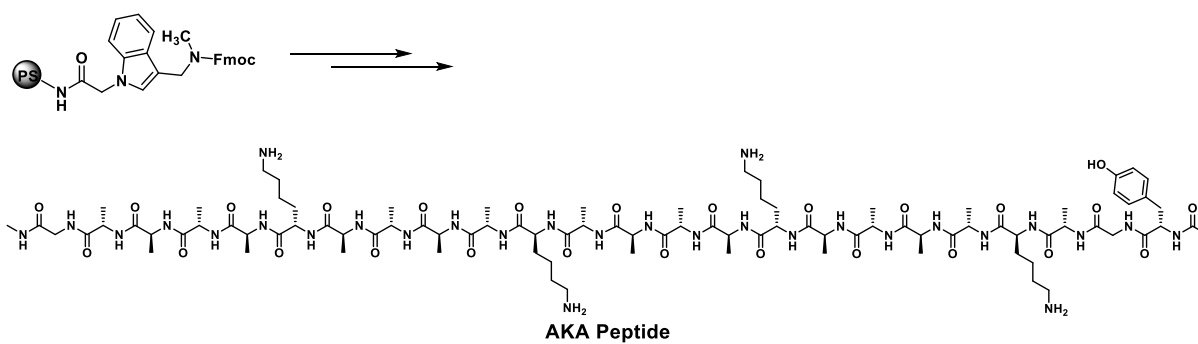

LC-MS chromatogram of AKA Peptide:

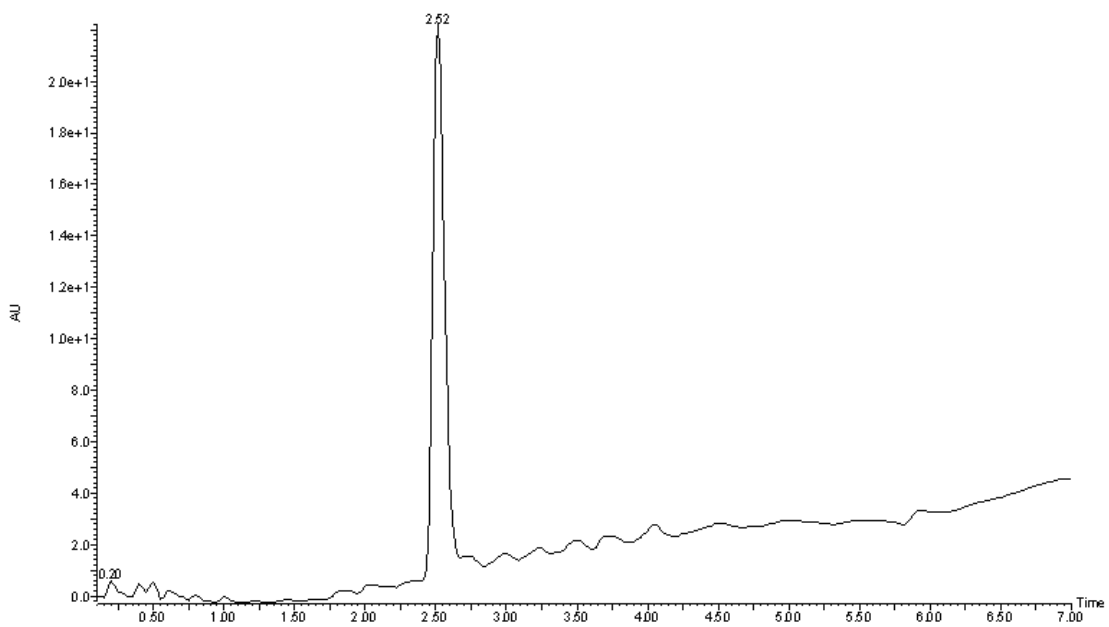

LC-MS mass spectrum of AKA Peptide:

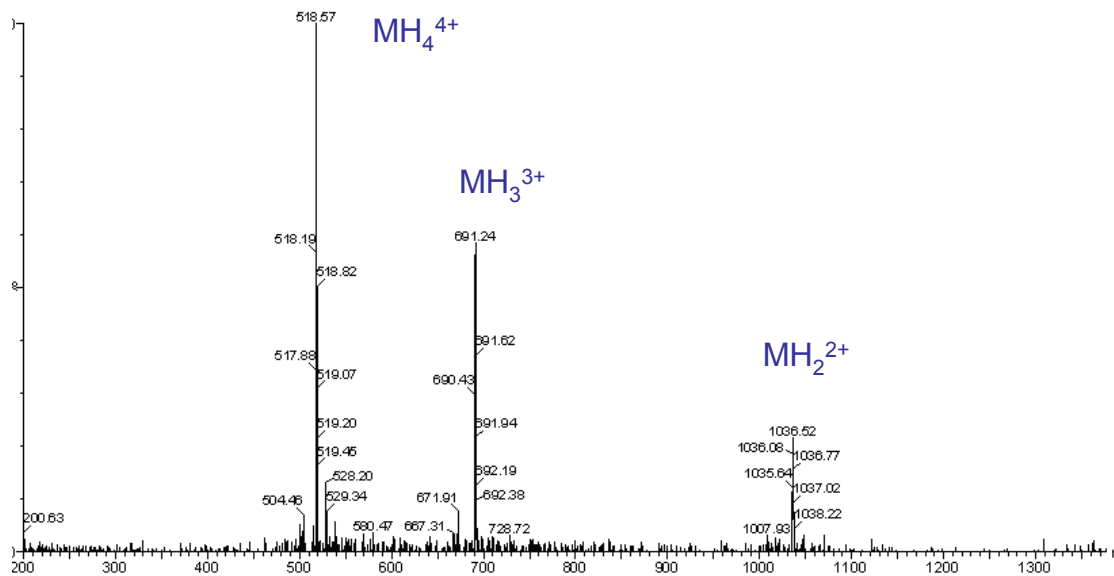

MALDI-TOF mass spectrum of AKA Peptide:

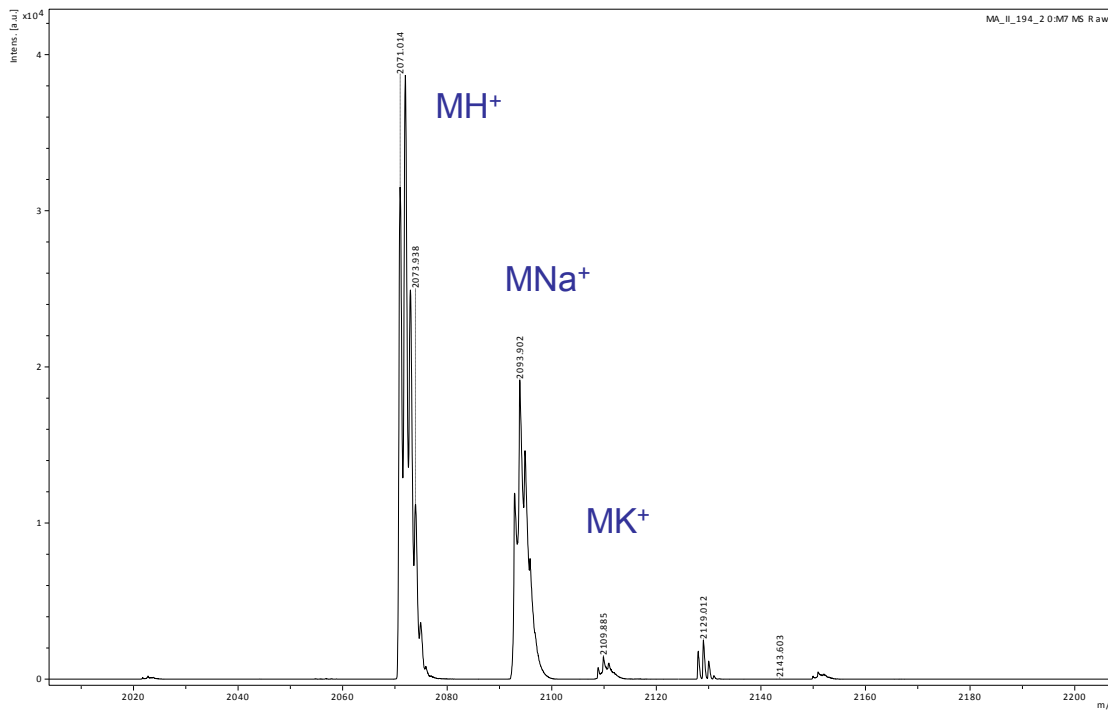



LC-MS mass spectrum of AKA<sub>A11P</sub>:

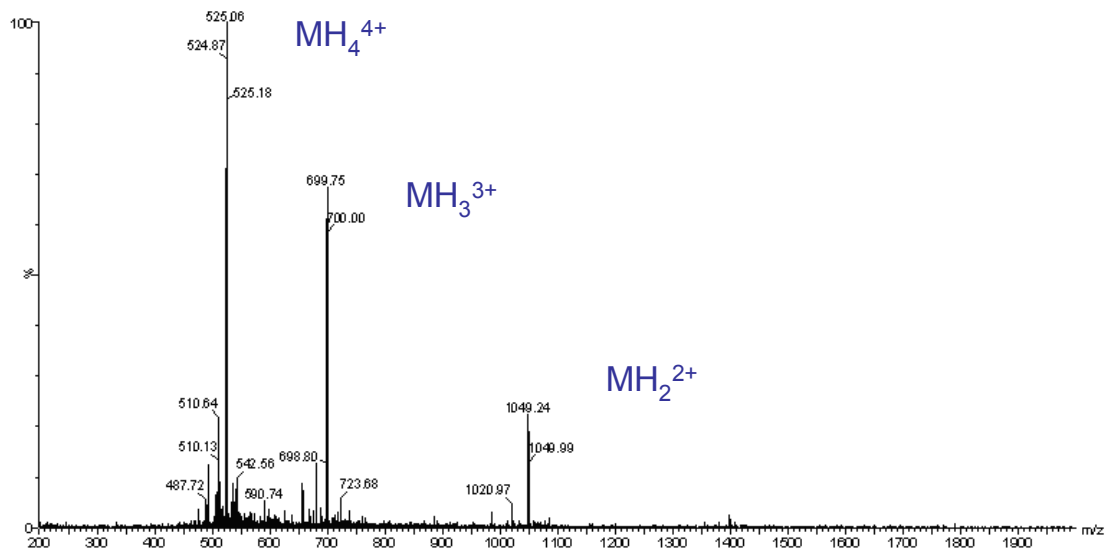

MALDI-TOF mass spectrum of AKA<sub>A11P</sub>:

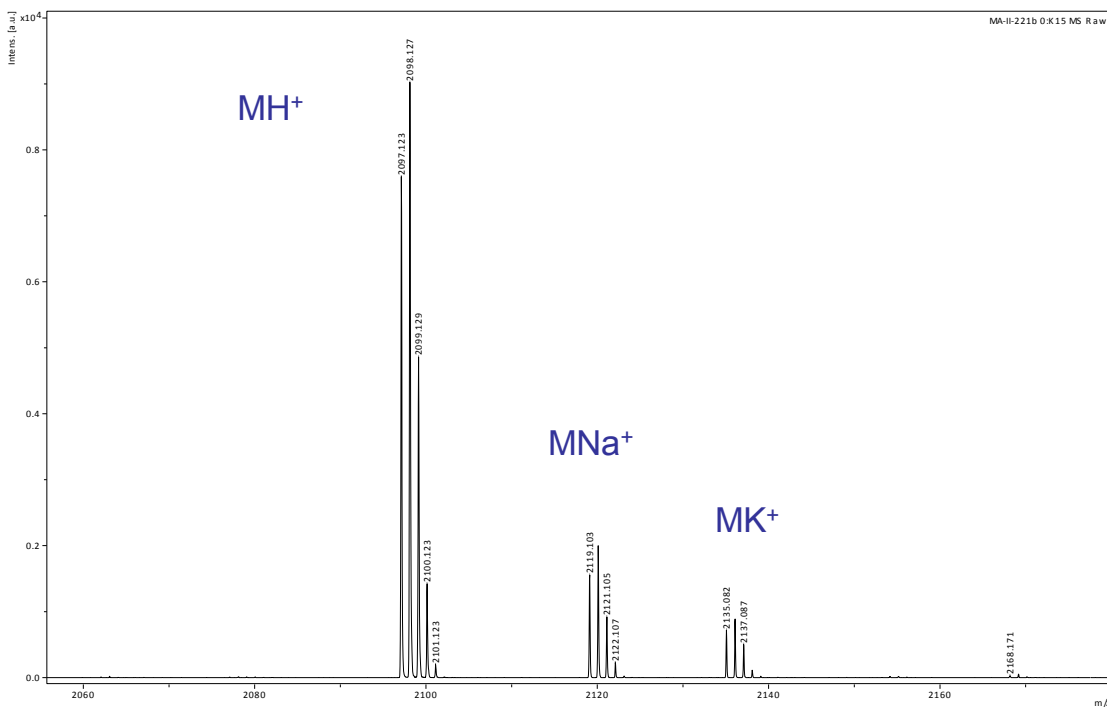

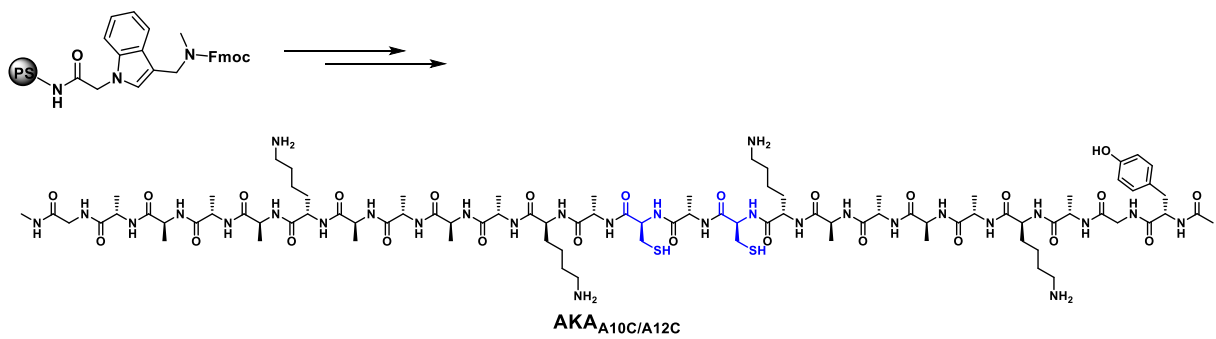

LC-MS chromatogram of **AKA<sub>A10C/A12C</sub>**:

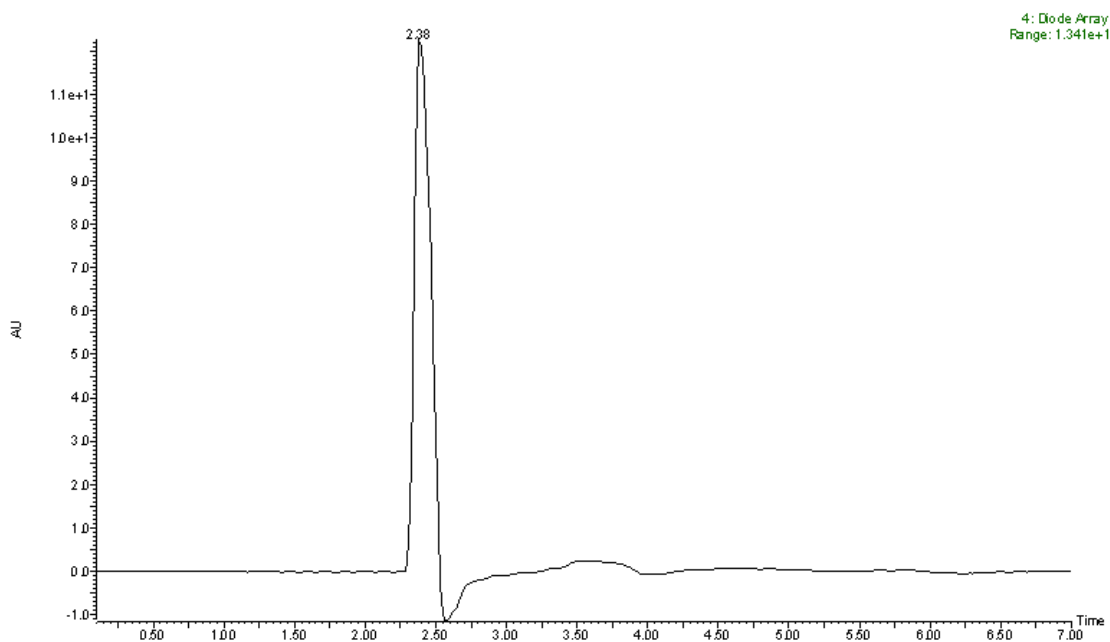

LC-MS mass spectrum of  $\text{AKA}_{\text{A10C/A12C}}$ :

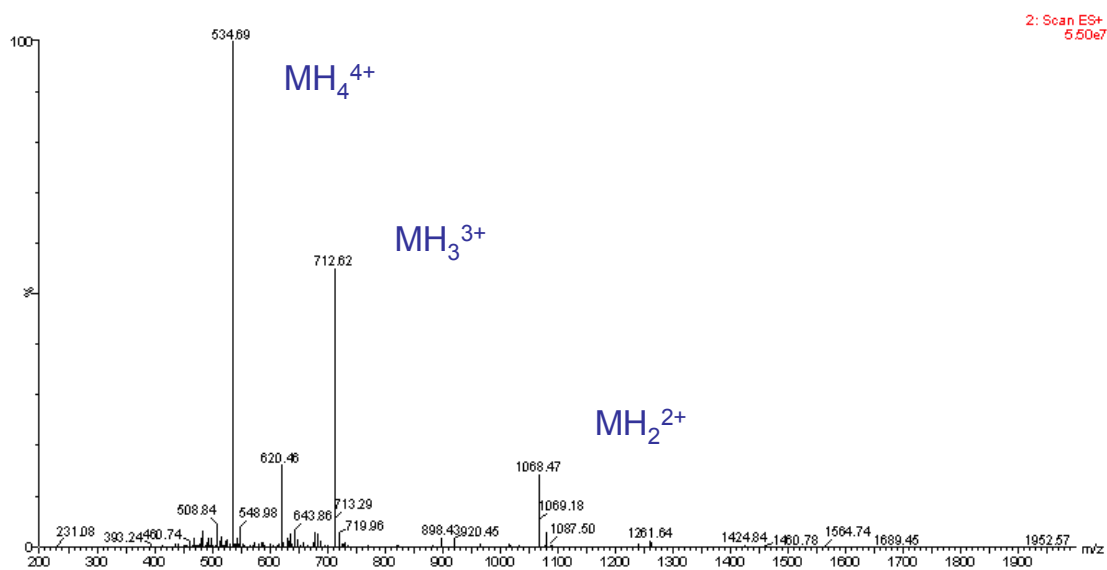

MALDI-TOF mass spectrum of  $\text{AKA}_{\text{A10C/A12C}}$ :

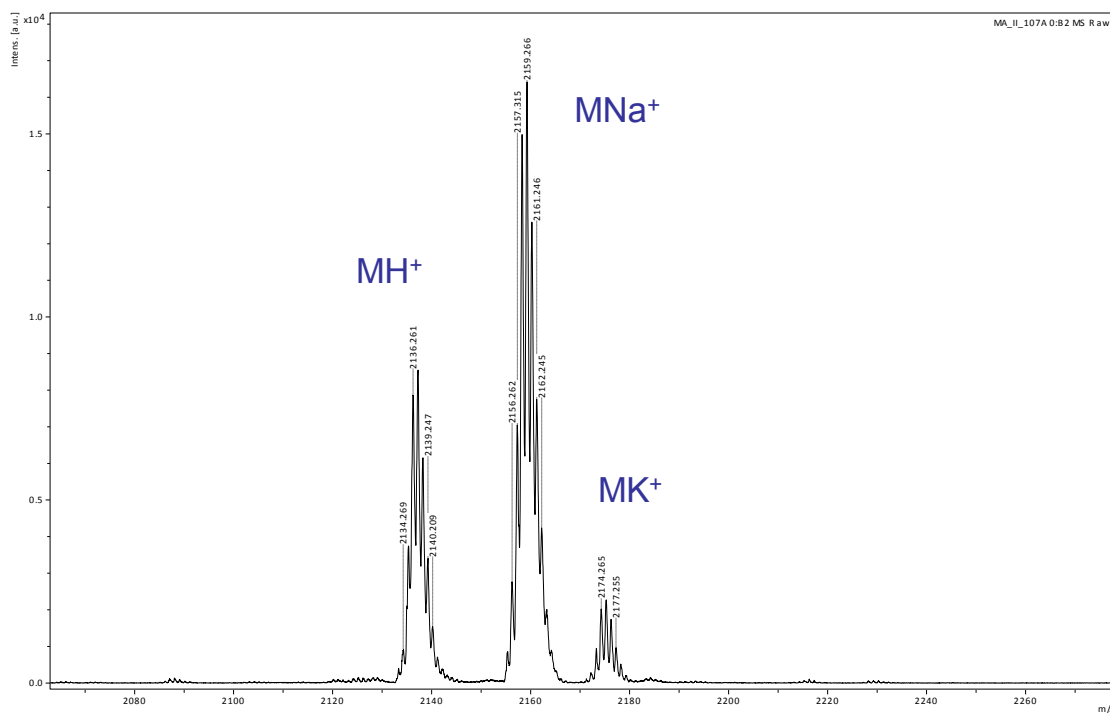



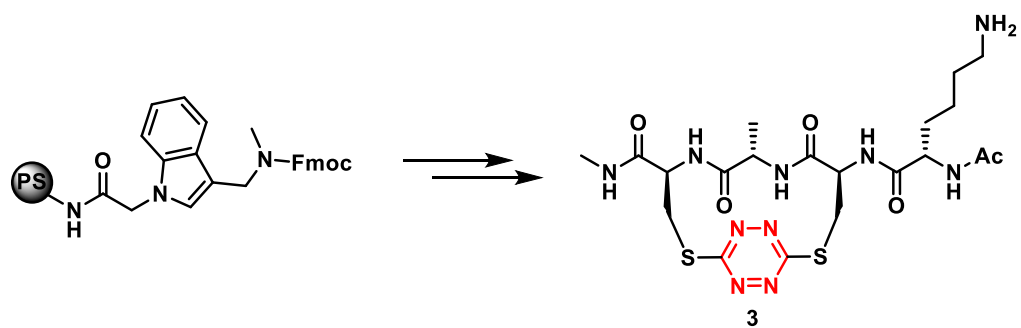

LC-MS chromatogram of peptide 3:

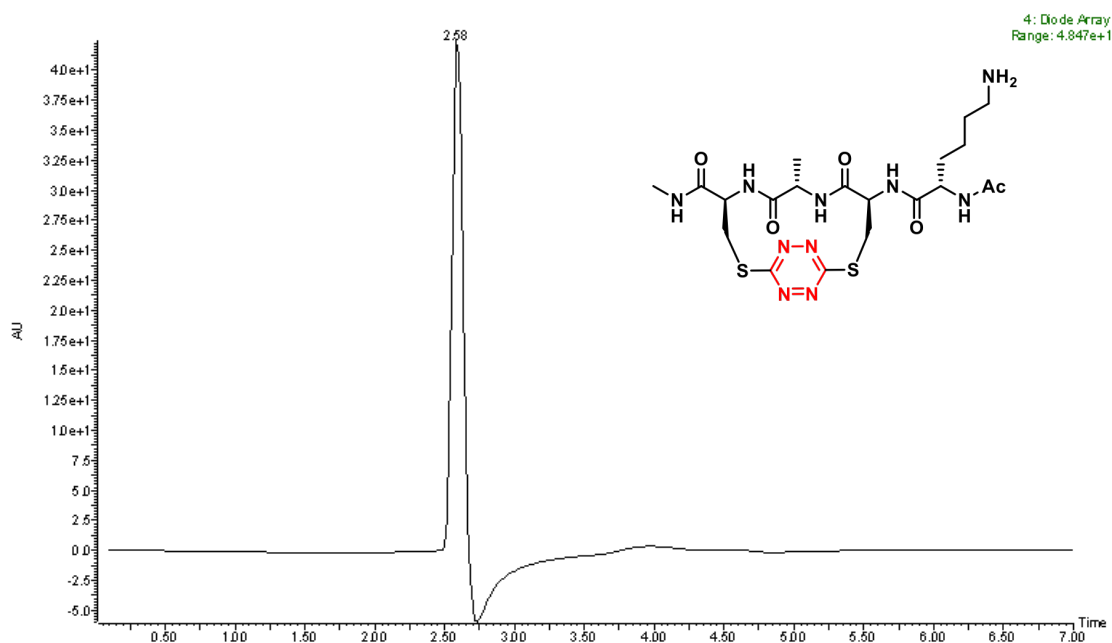

LC-MS mass spectrum of peptide 3:

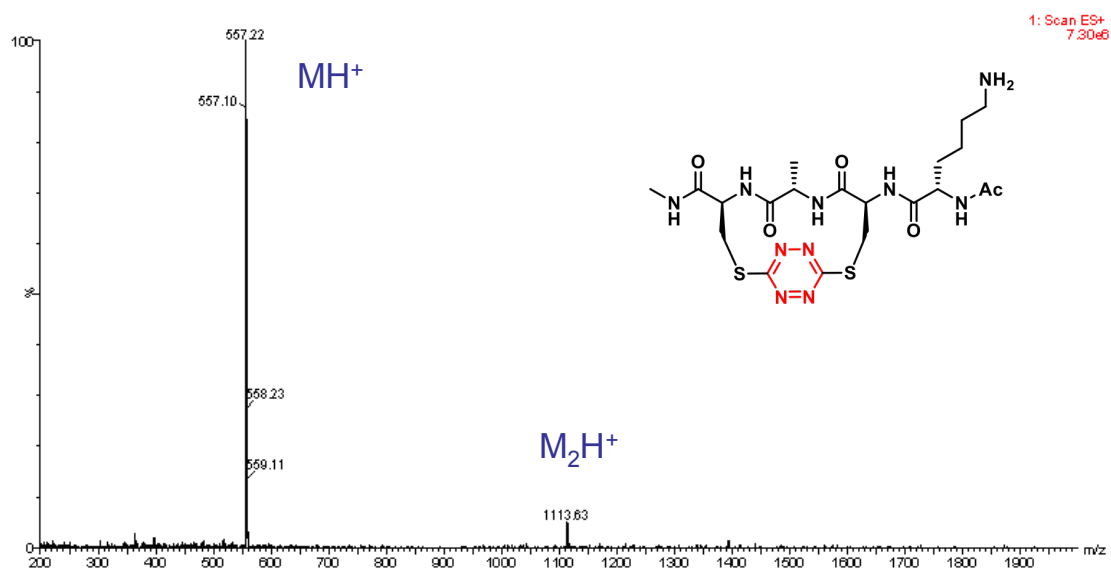

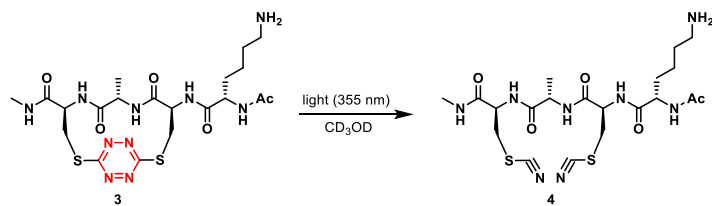

LC-MS mass spectra comparing peptide **3** to photolyzed peptide **4**:

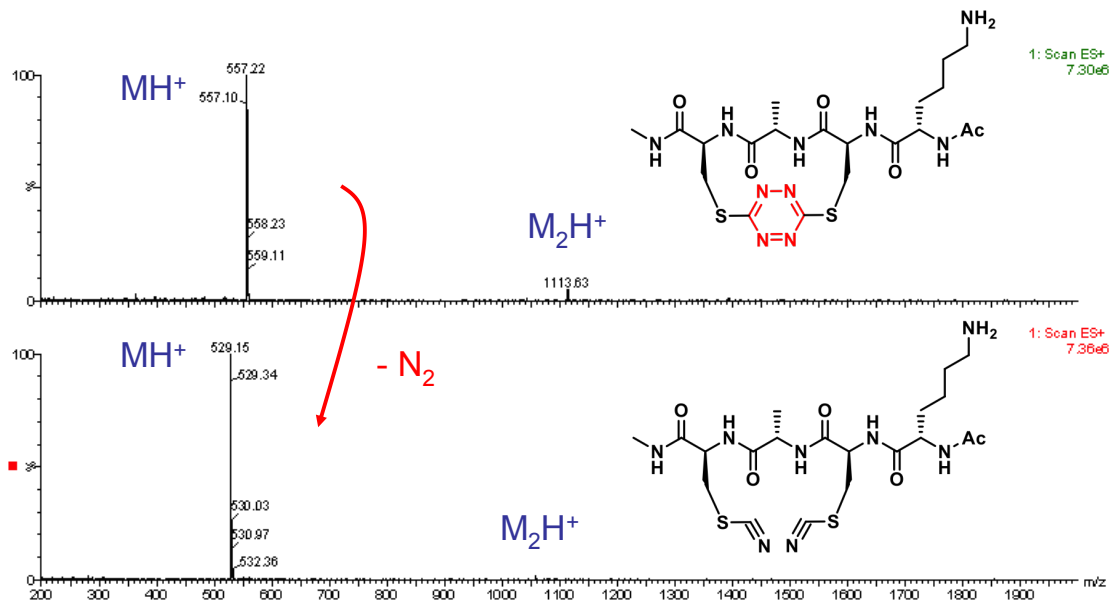

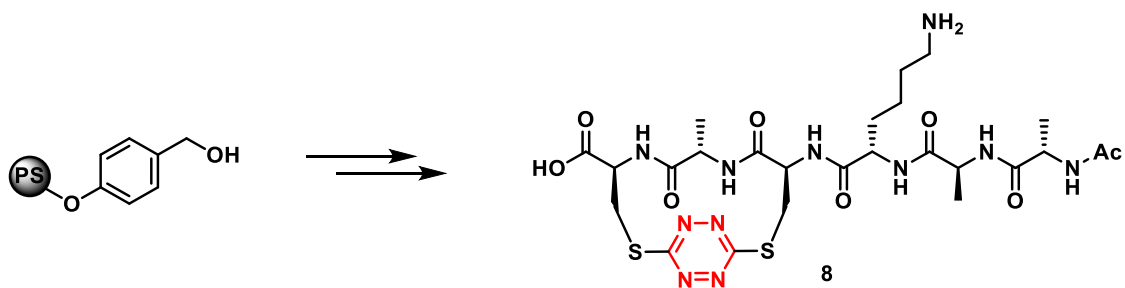

LC-MS chromatogram of peptide 8:

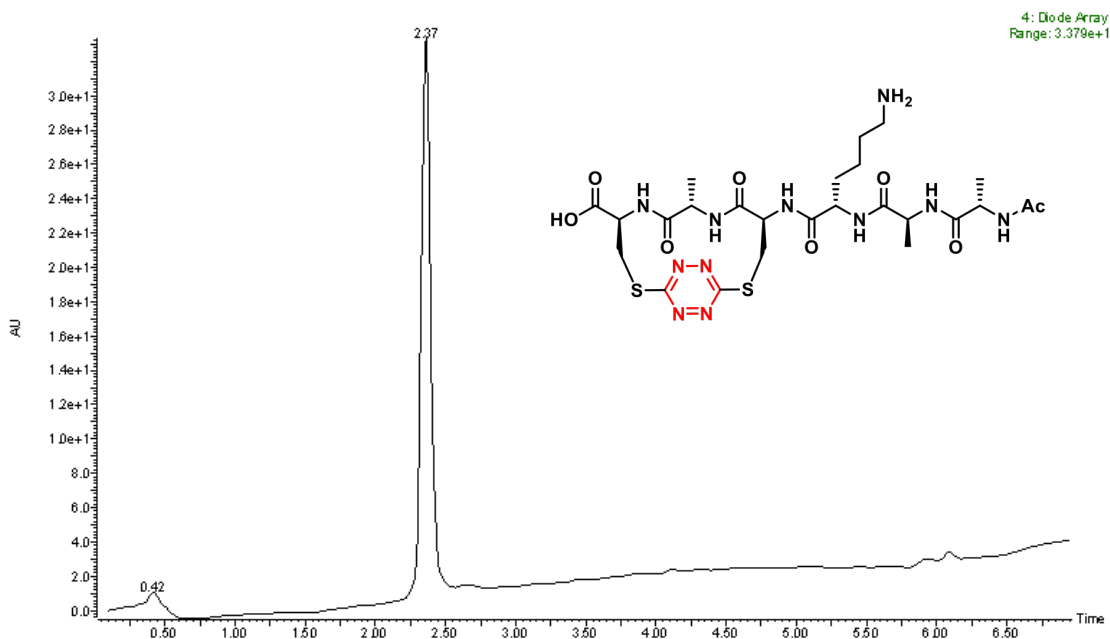

LC-MS mass spectrum of peptide 8:

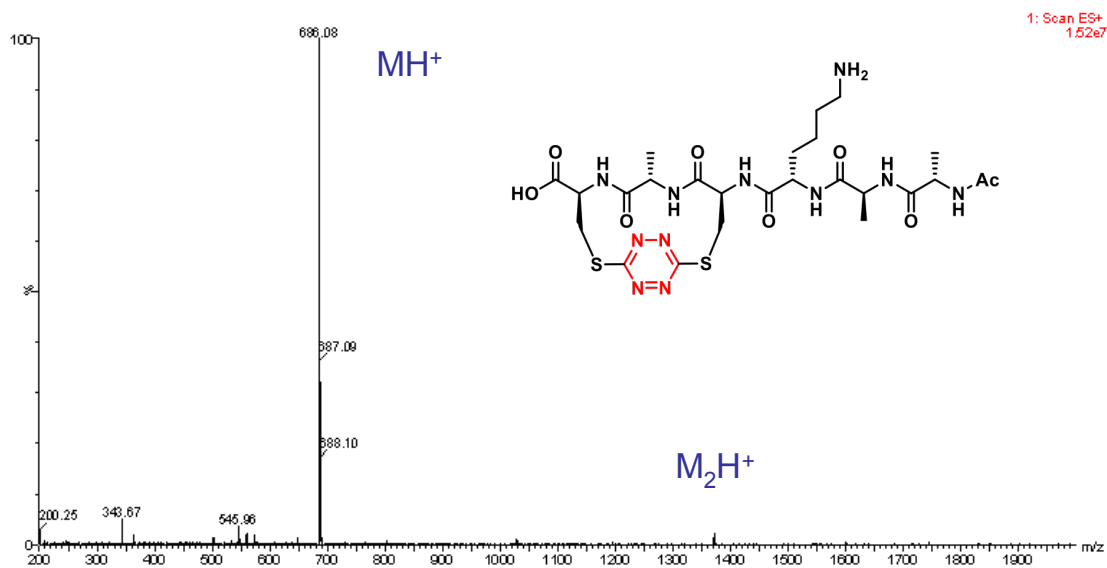

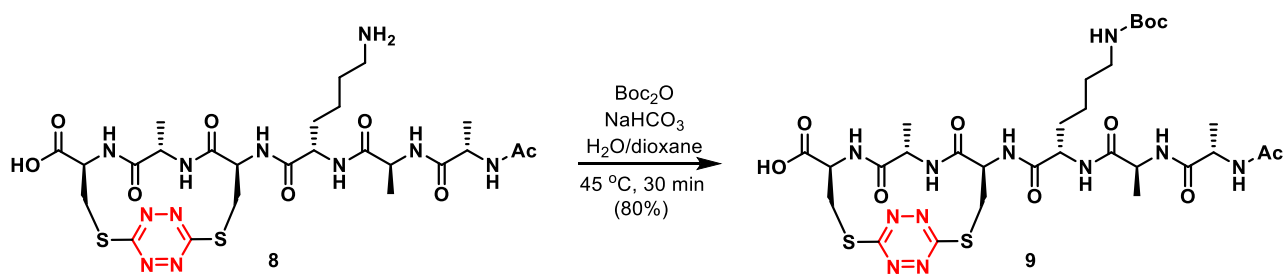

LC-MS chromatogram of peptide 9:

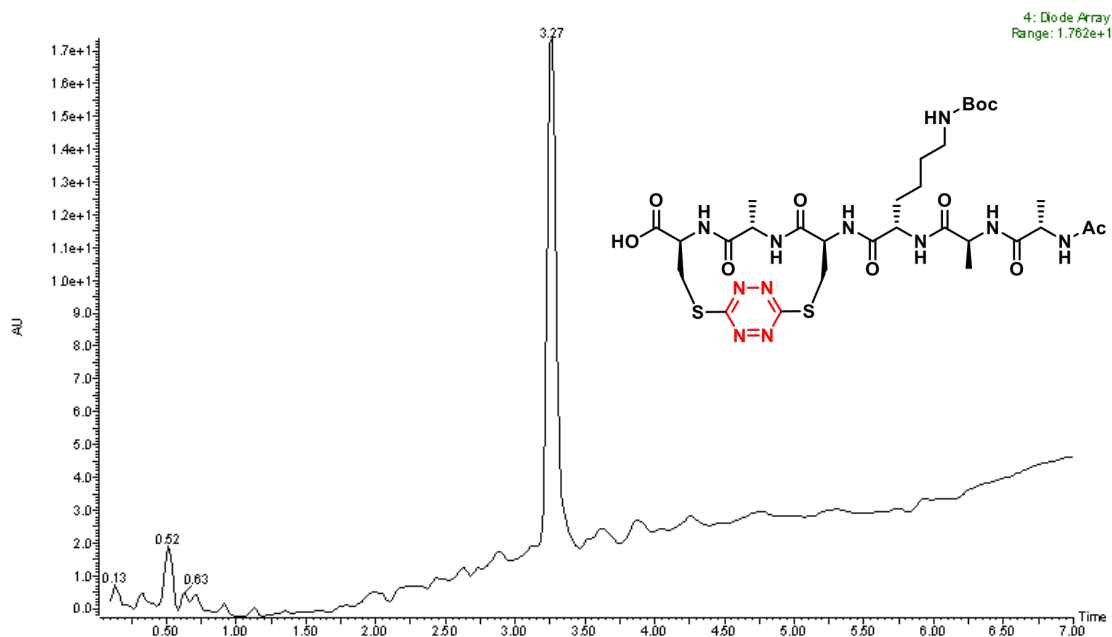

LC-MS mass spectrum of peptide 9:

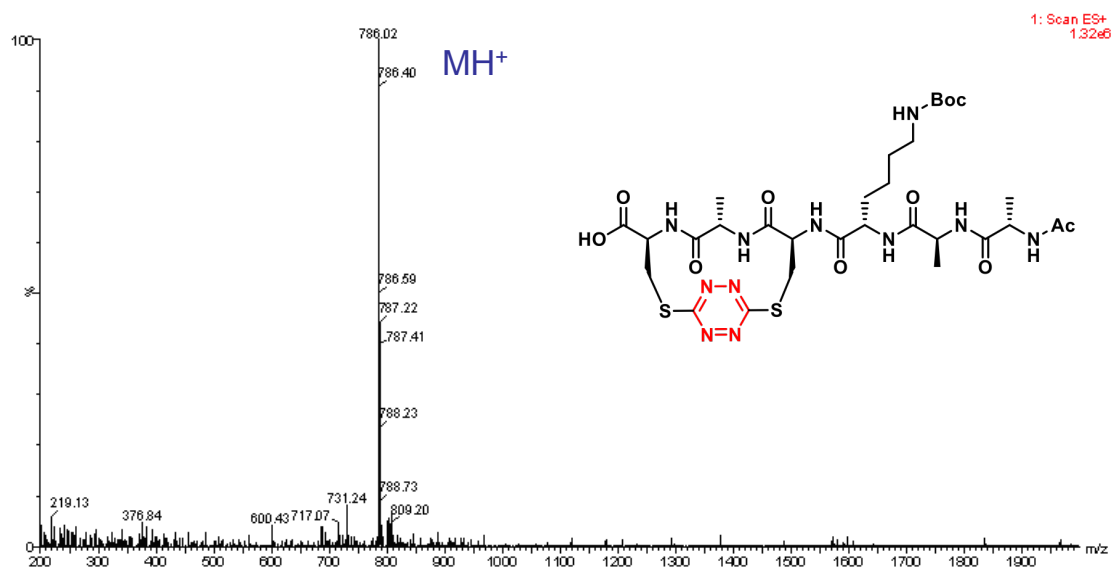

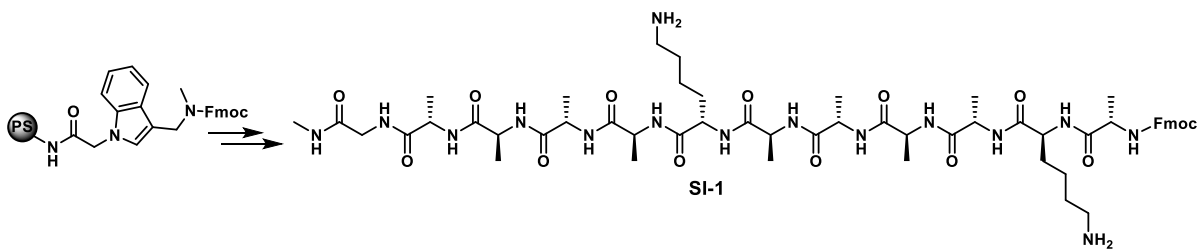

LC-MS chromatogram of peptide SI-1:

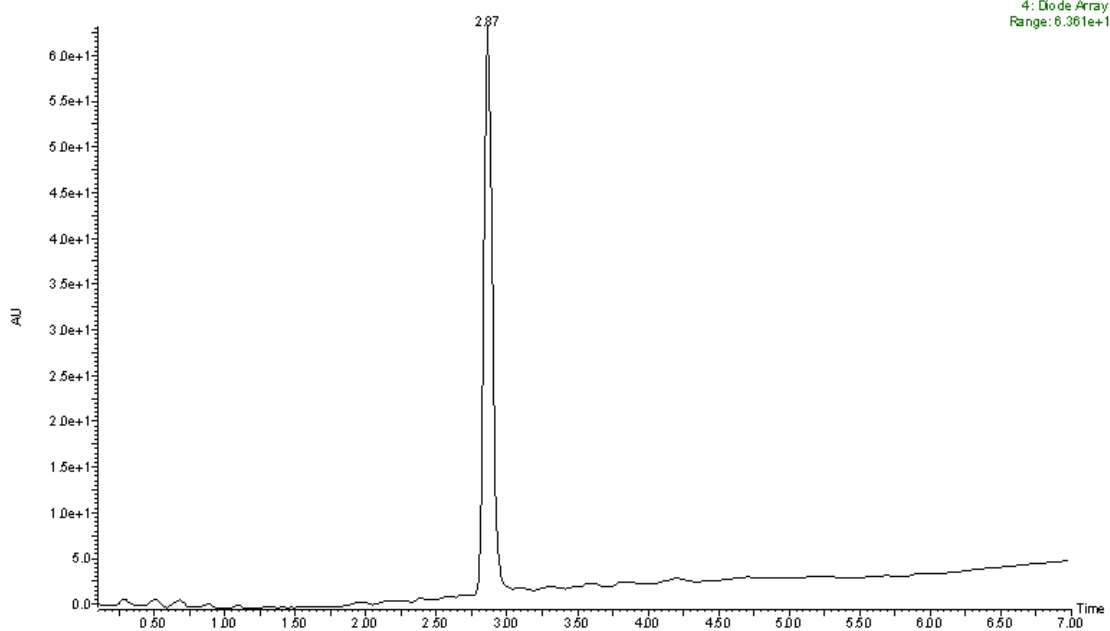



LC-MS mass spectrum of peptide **SI-1**:

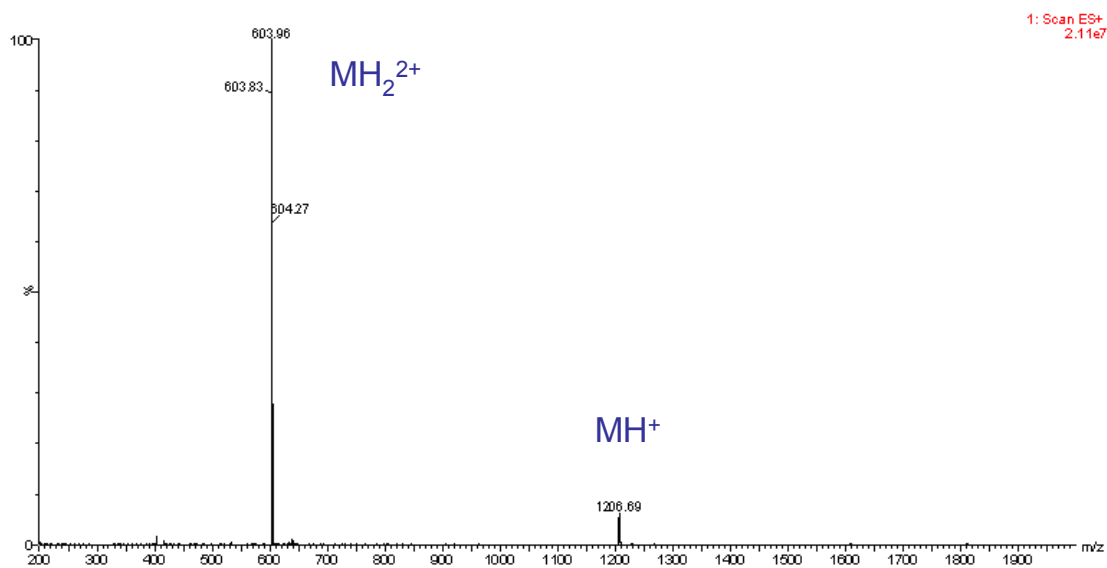

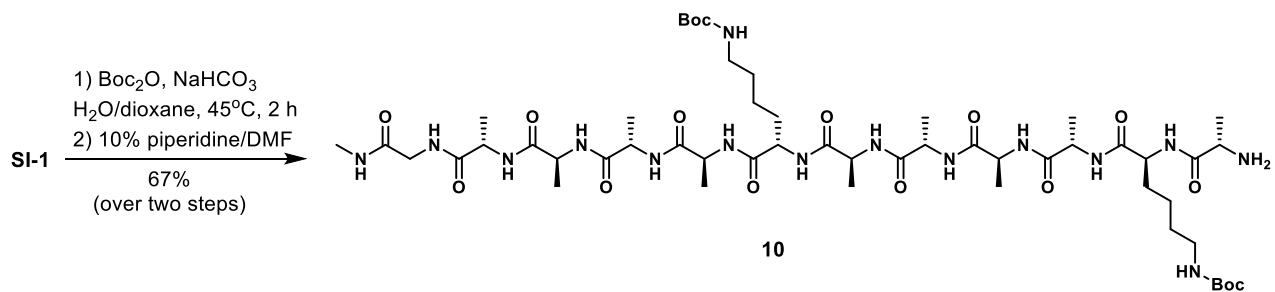

LC-MS chromatogram of peptide **10**:

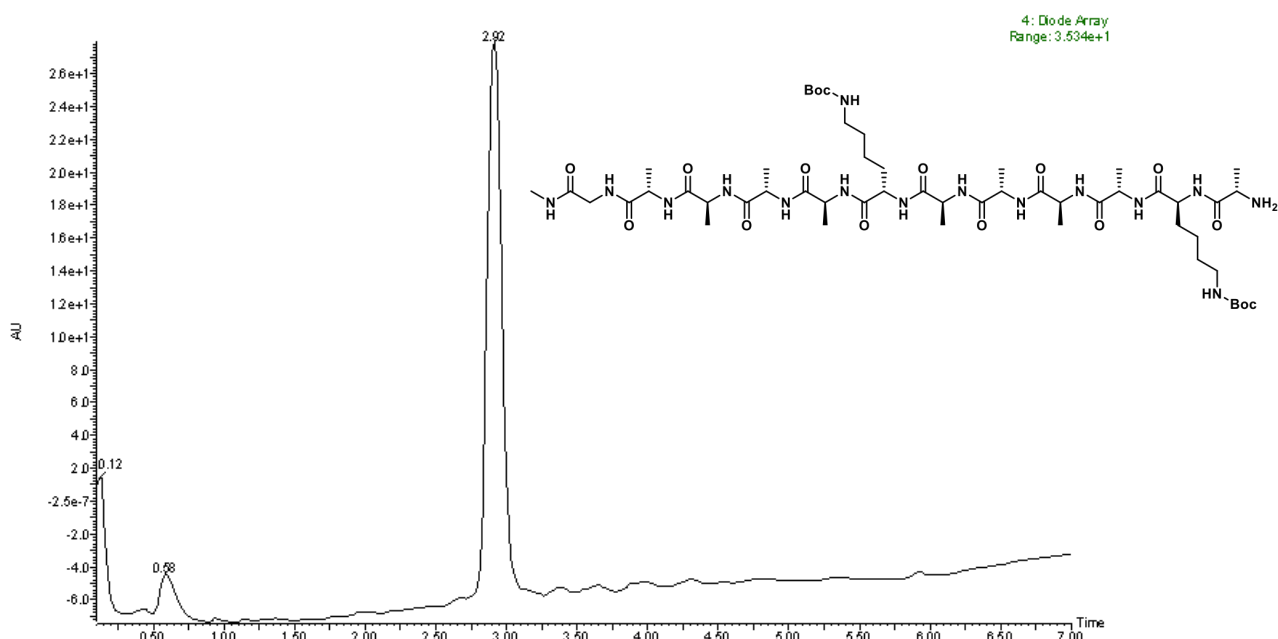



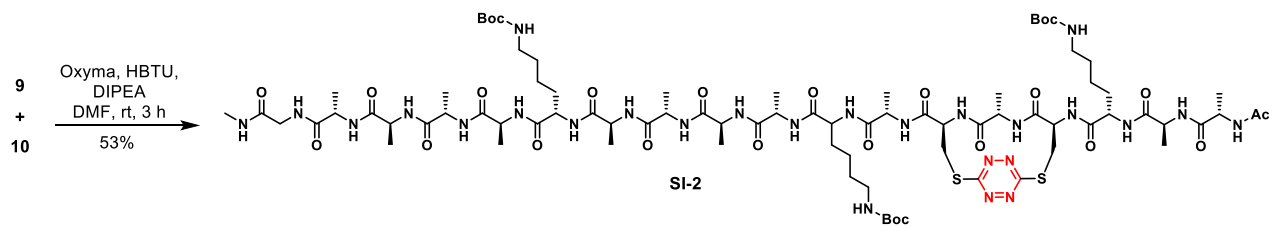

LC-MS chromatogram of peptide SI-2:

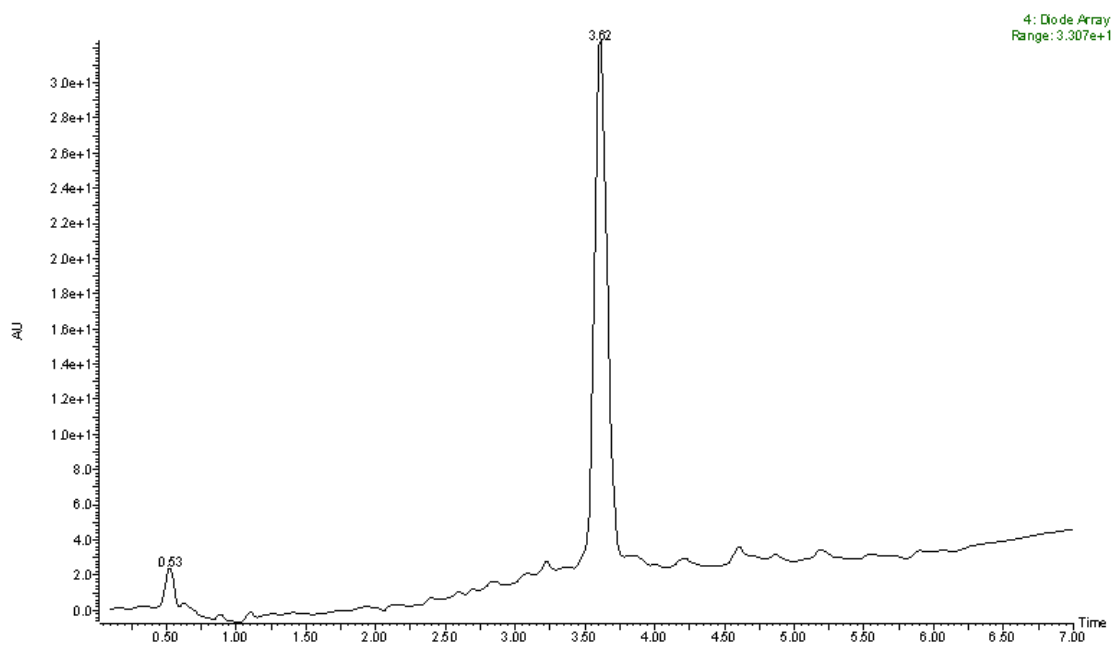

LC-MS mass spectrum of peptide SI-2:

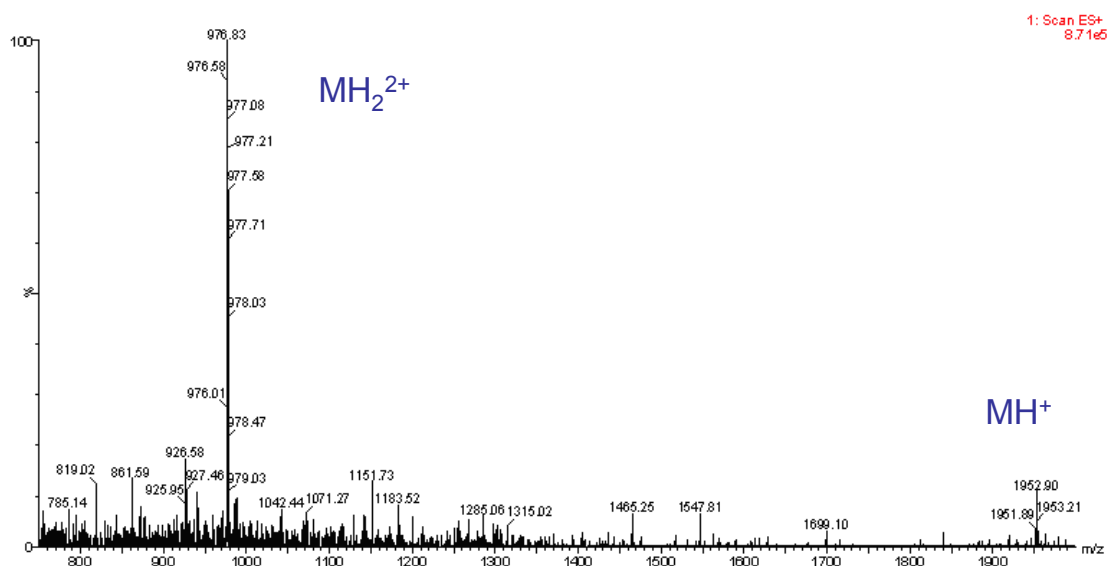

MALDI-TOF mass spectrum of peptide SI-2:

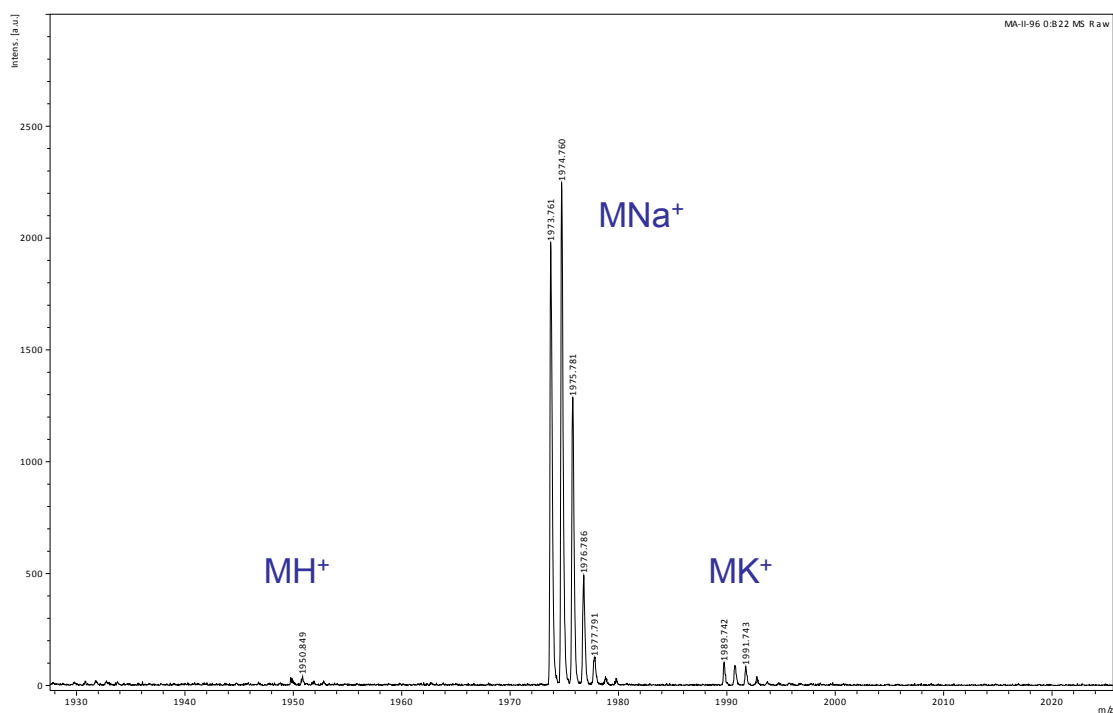

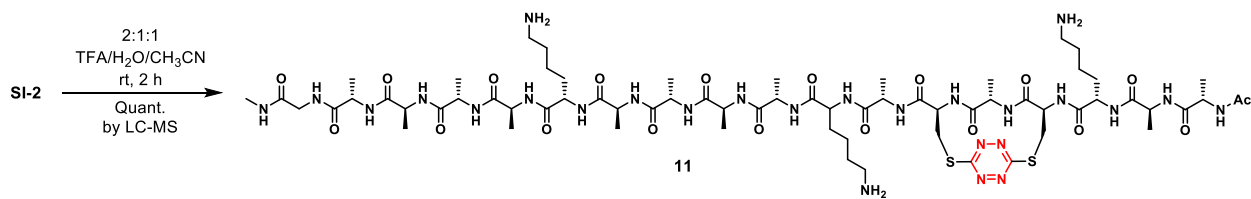

LC-MS chromatogram of peptide **11**:

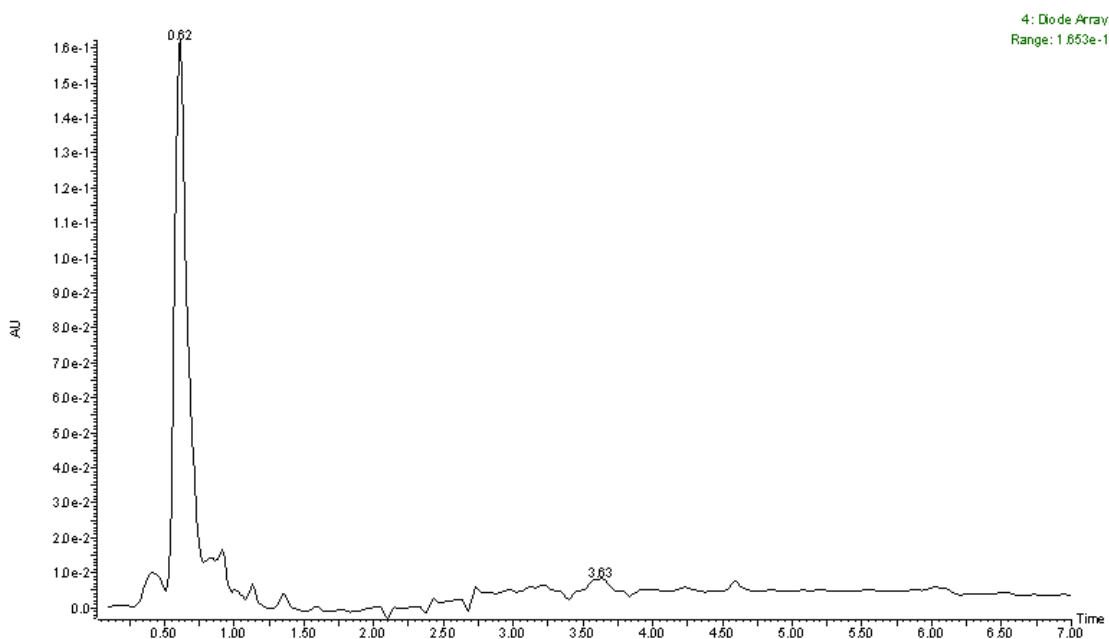

LC-MS mass spectrum of peptide 11:

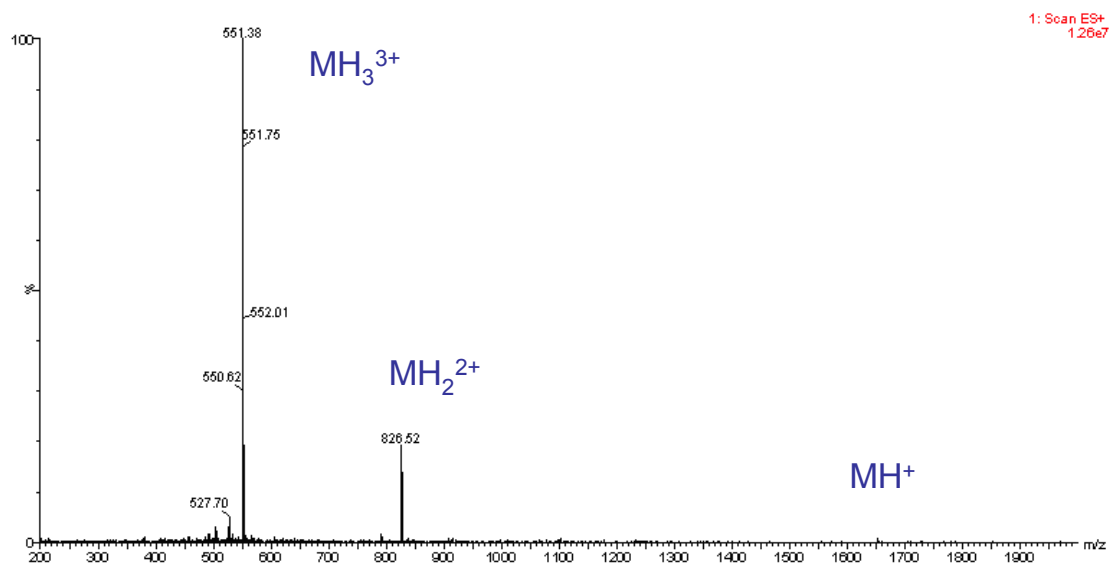

MALDI-TOF mass spectrum of peptide 11:

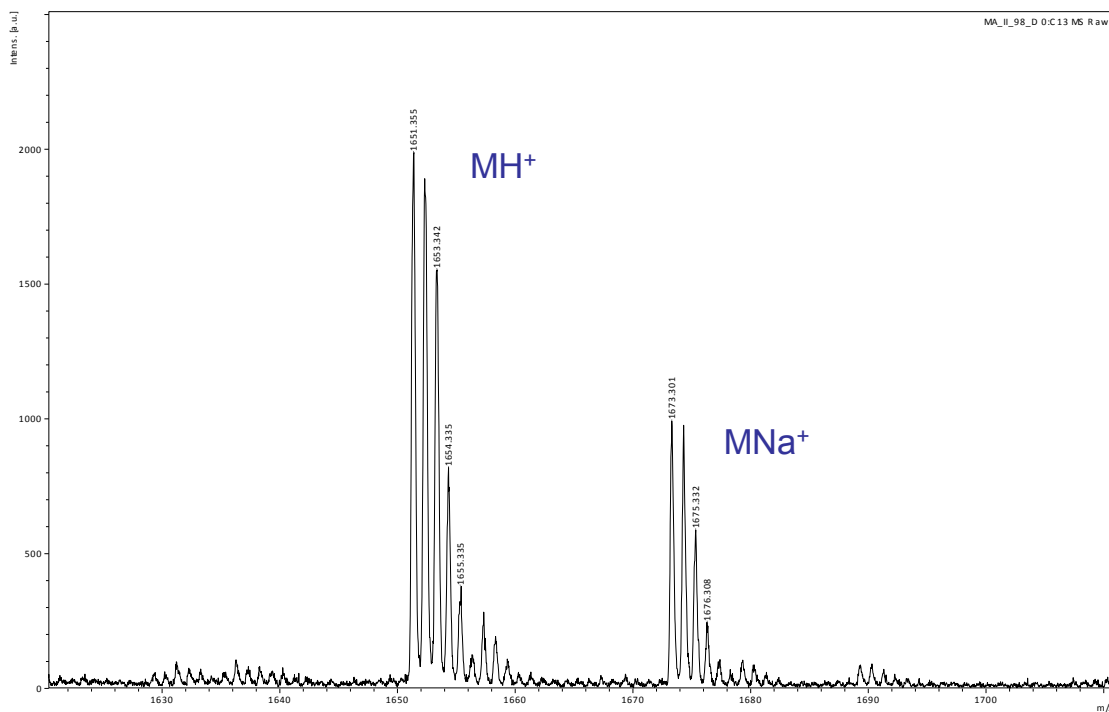

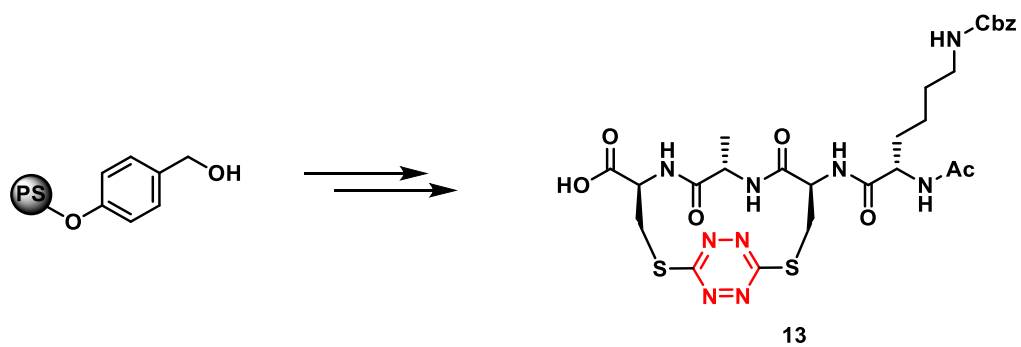

LC-MS chromatogram of peptide 13:

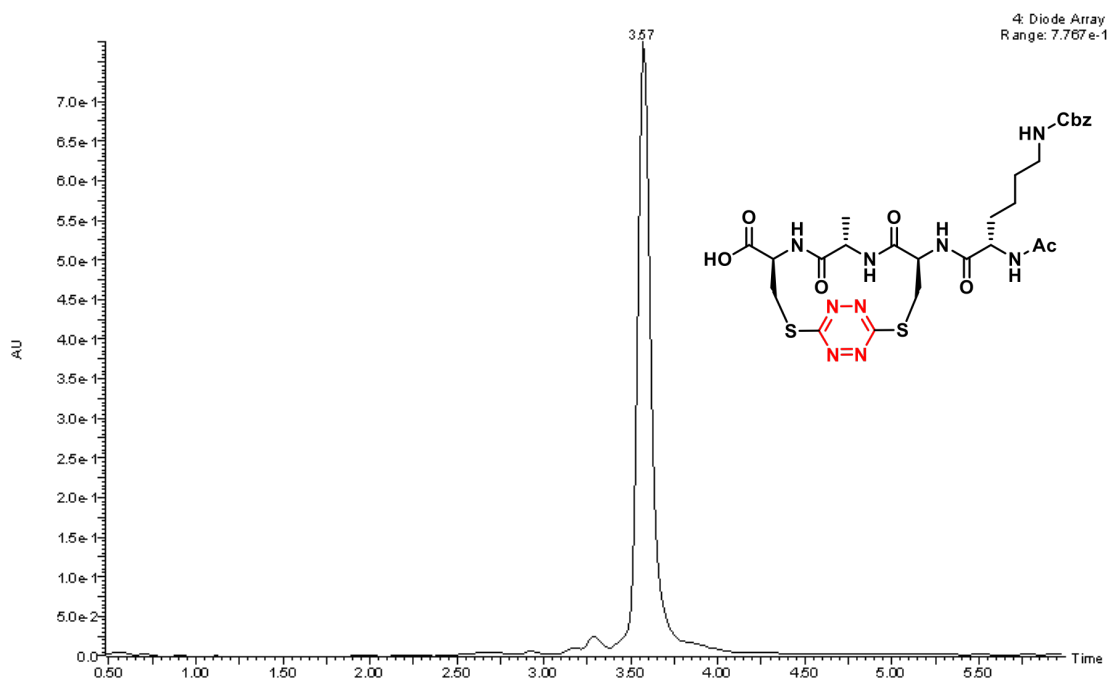



LC-MS mass spectrum of peptide 13:

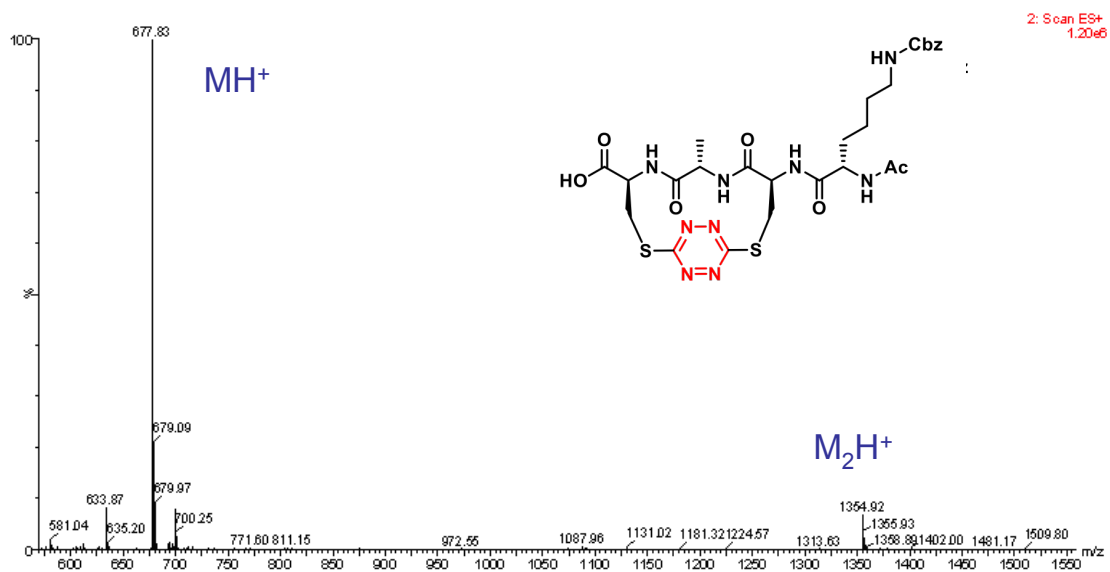

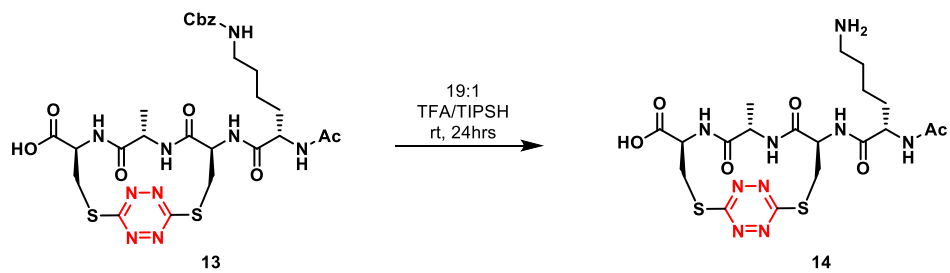

LC-MS chromatogram of peptide 14:

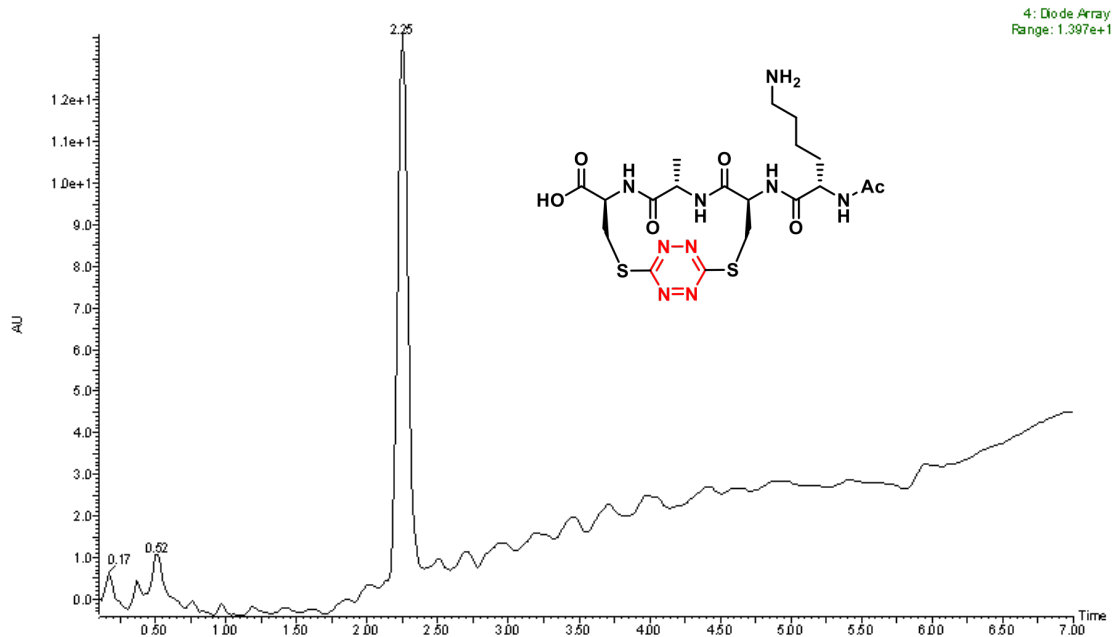

LC-MS mass spectrum of peptide **14**:

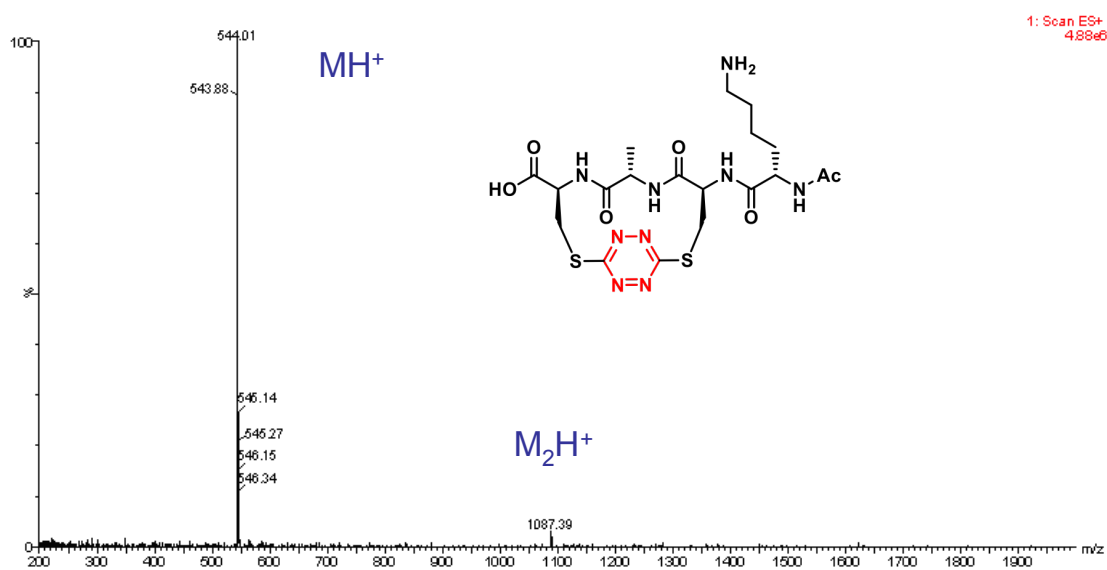

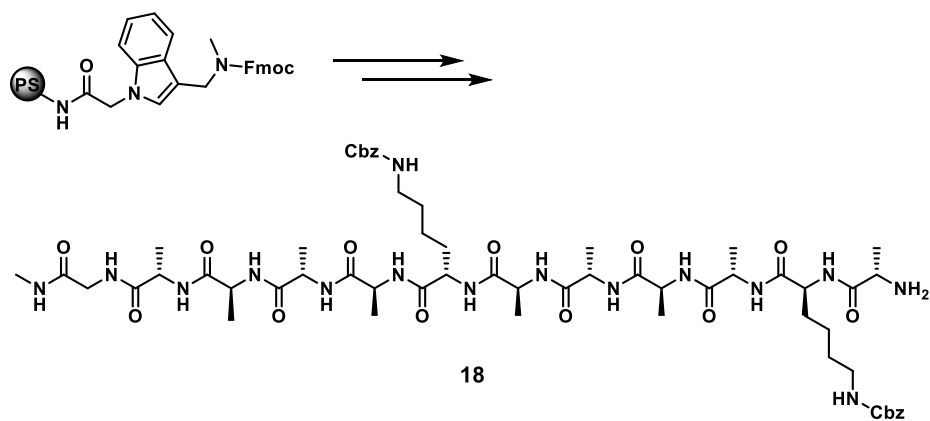

LC-MS chromatogram of peptide **18**:

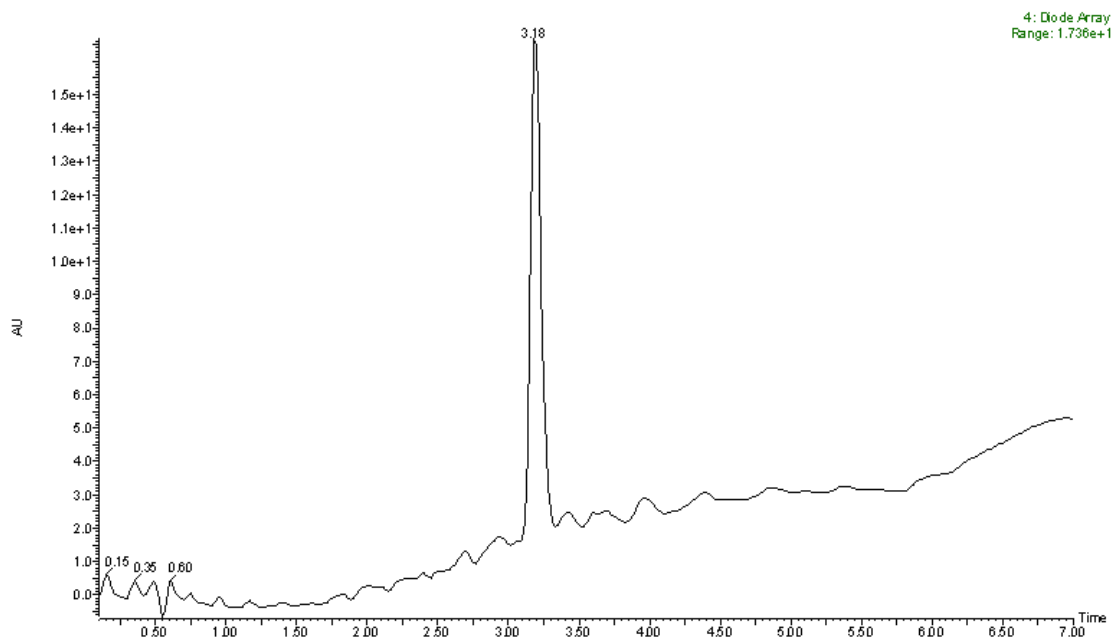

LC-MS mass spectrum of peptide 18:

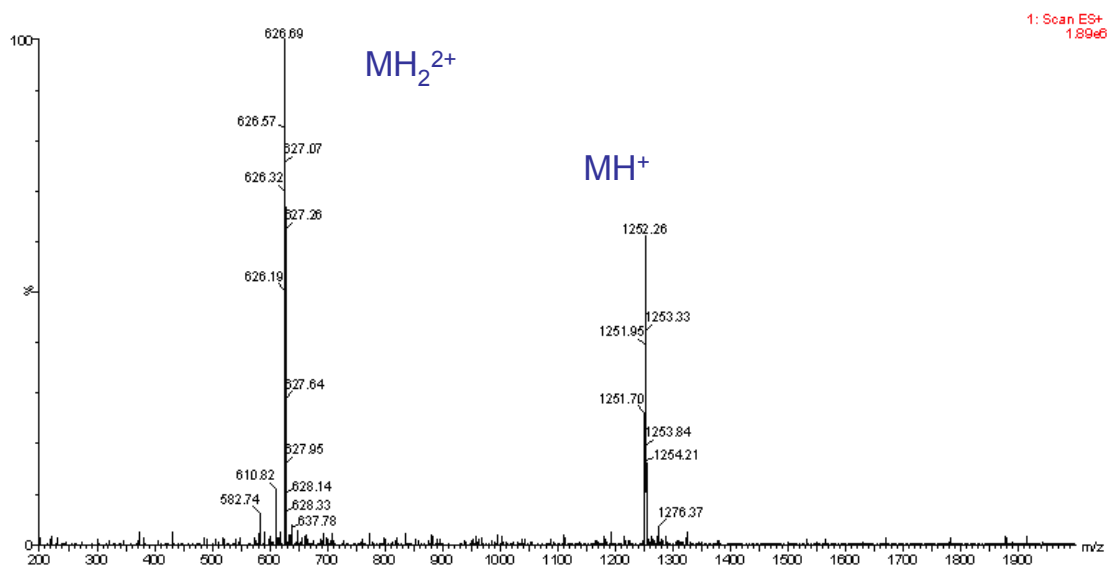

MALDI-TOF mass spectrum of peptide 18:

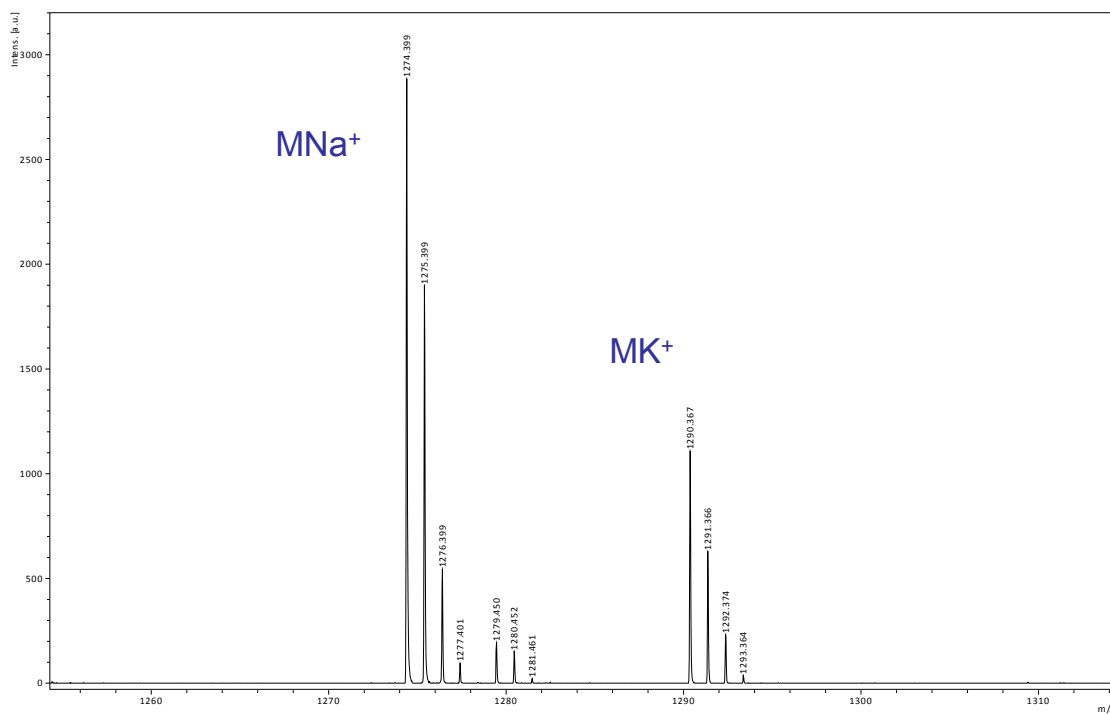

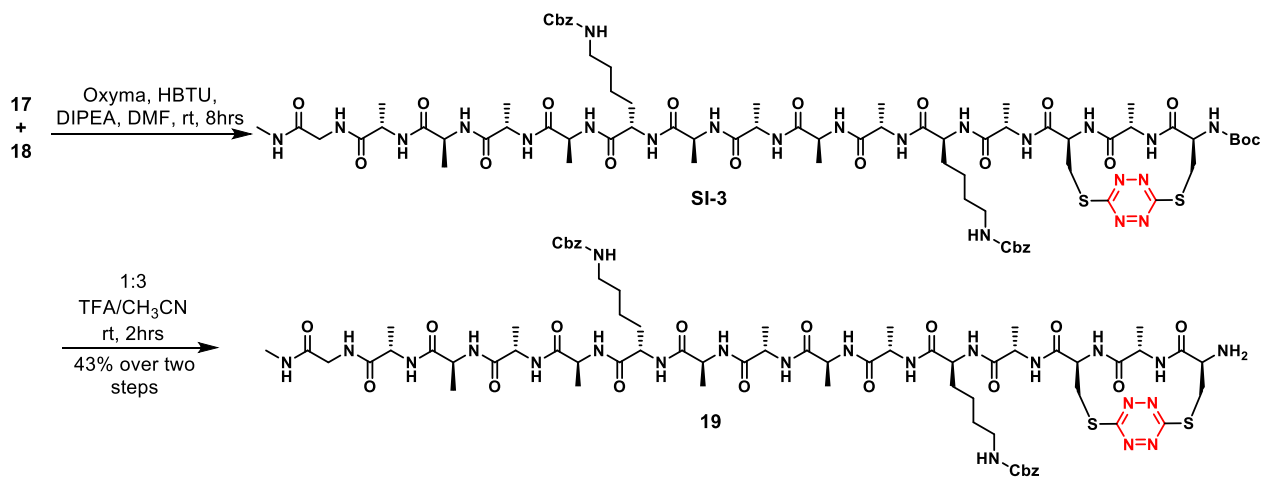

LC-MS chromatogram of peptide **19**:

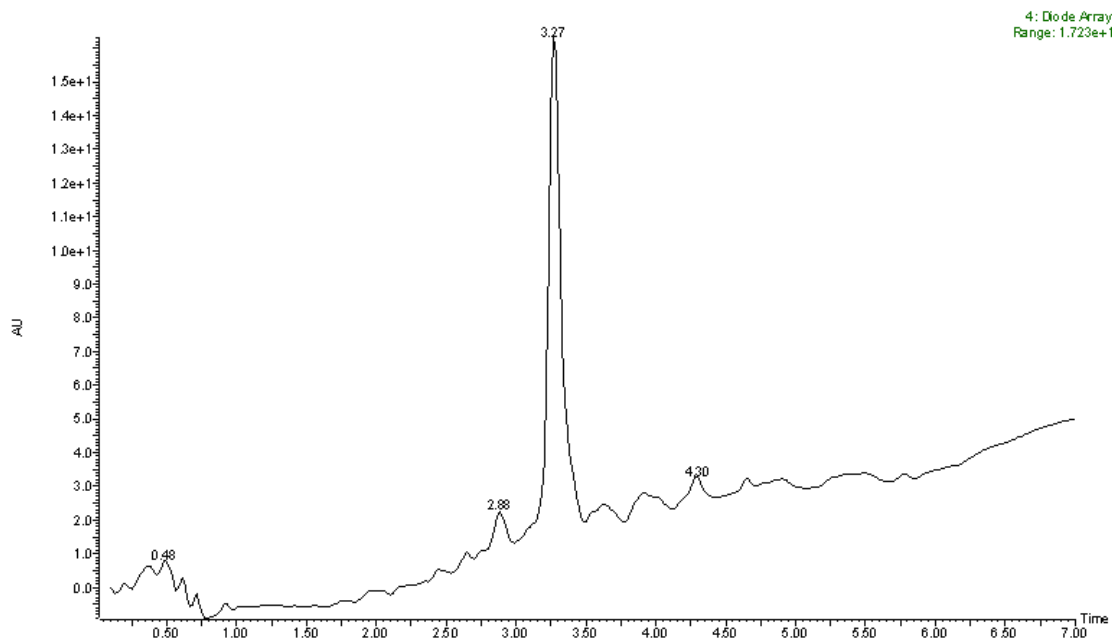

LC-MS mass spectrum of peptide 19:

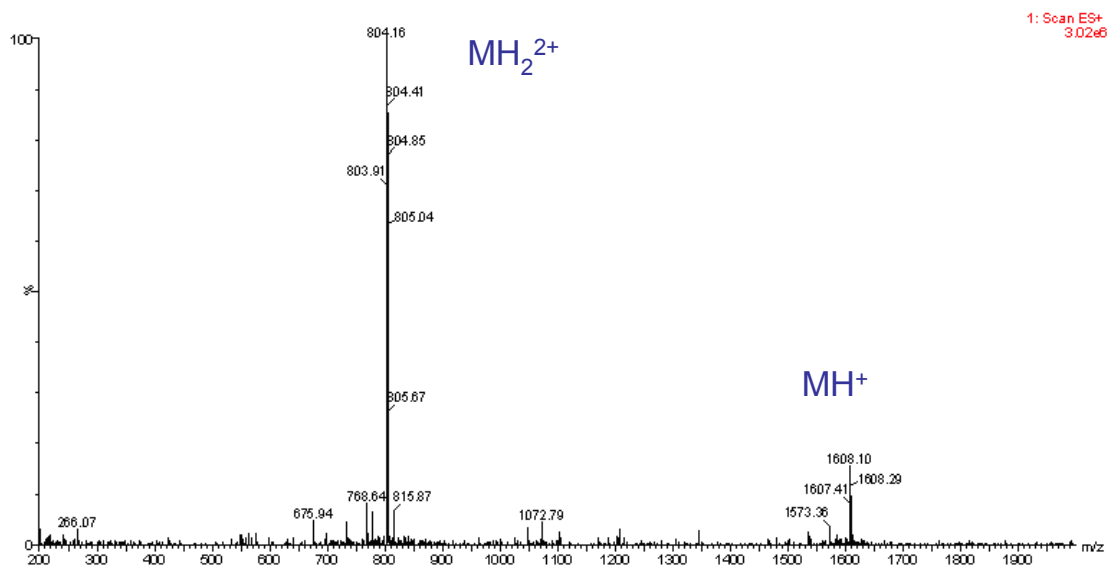

MALDI-TOF mass spectrum of peptide 19:

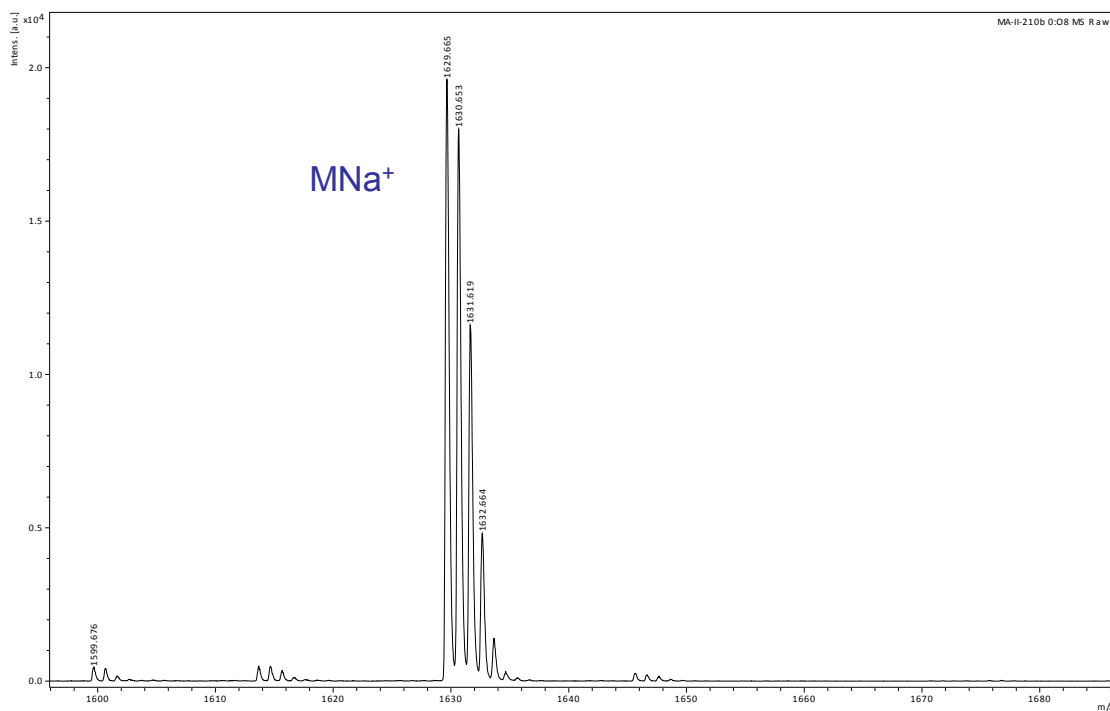

LC-MS chromatogram of peptide SI-3:

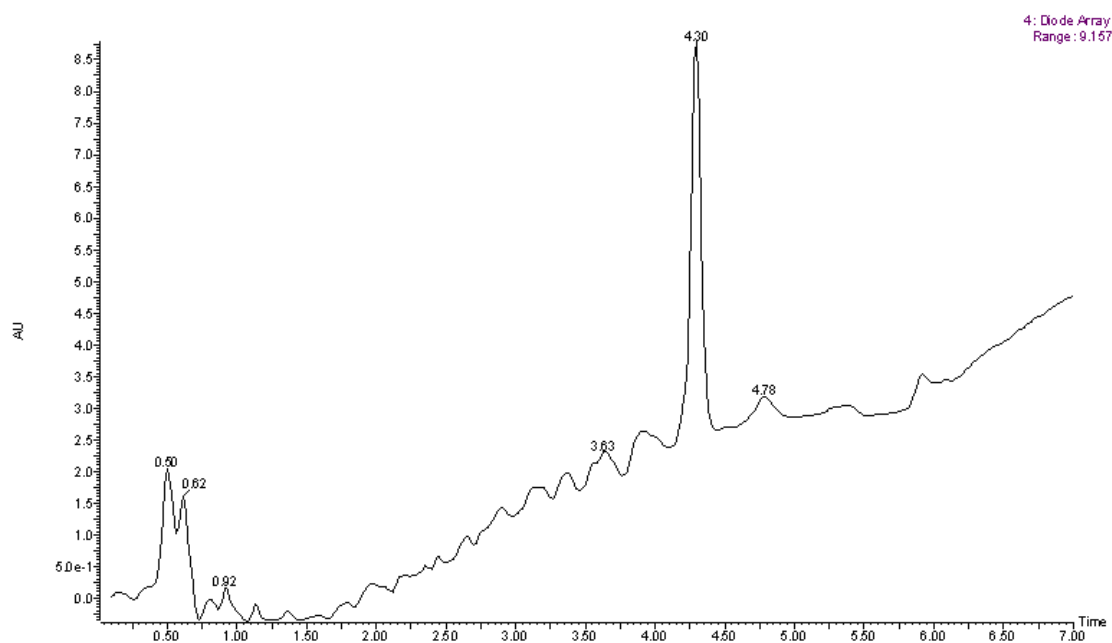



LC-MS mass spectrum of peptide SI-3:

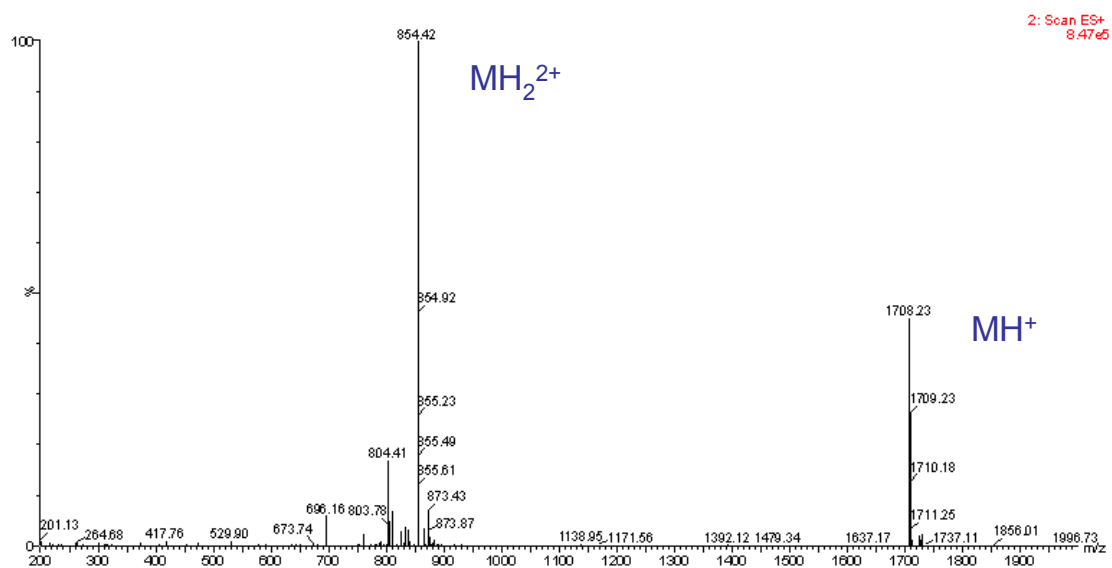

MALDI-TOF mass spectrum of peptide SI-3:

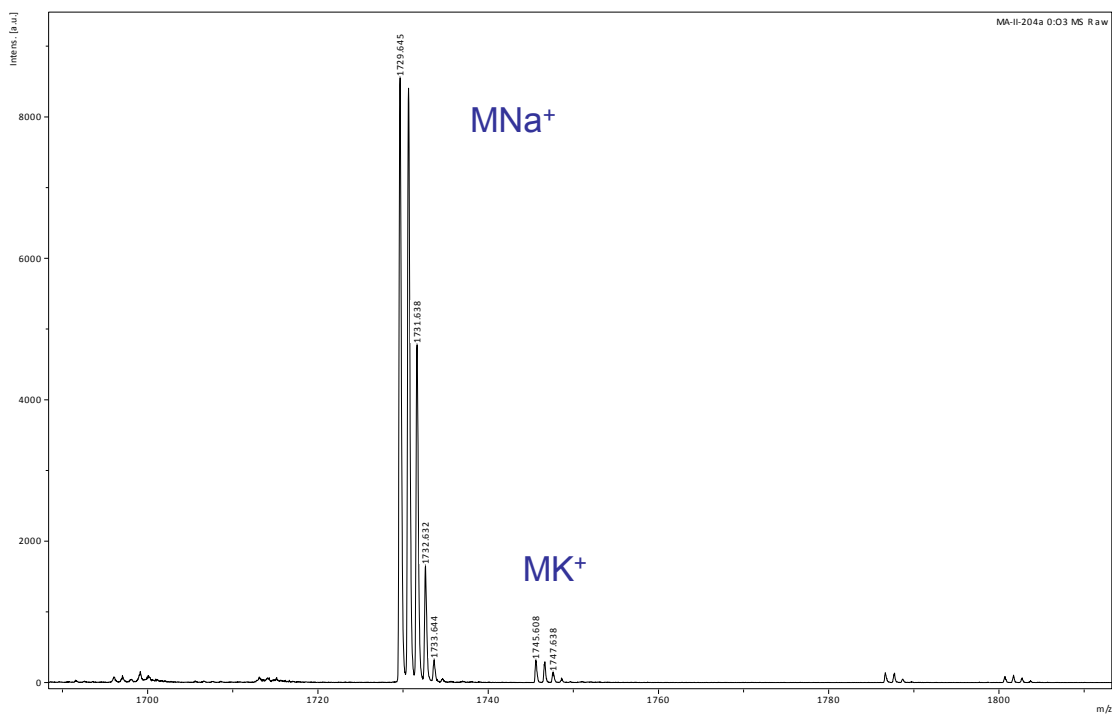

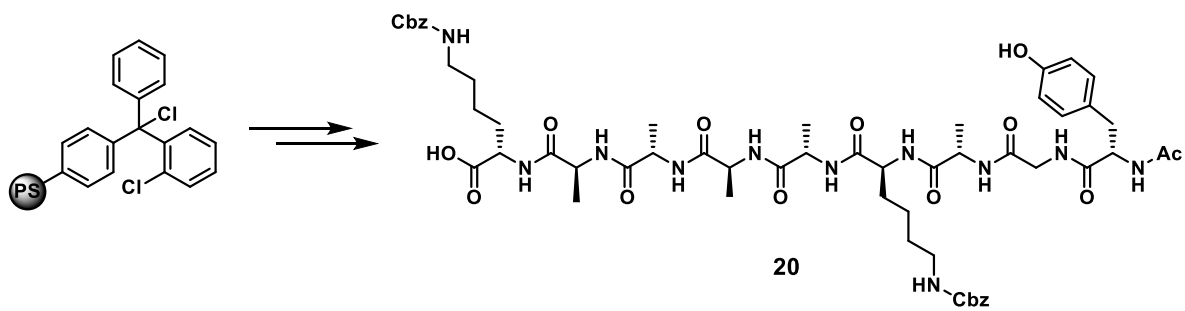

LC-MS chromatogram of peptide **20**:

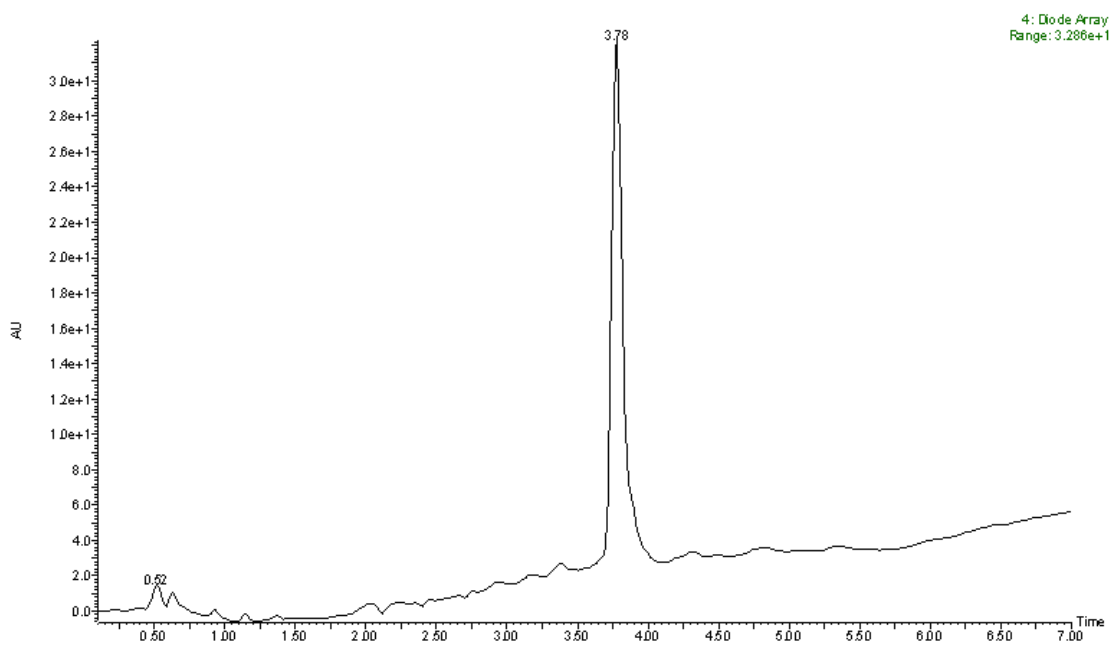

LC-MS mass spectrum of peptide 20:

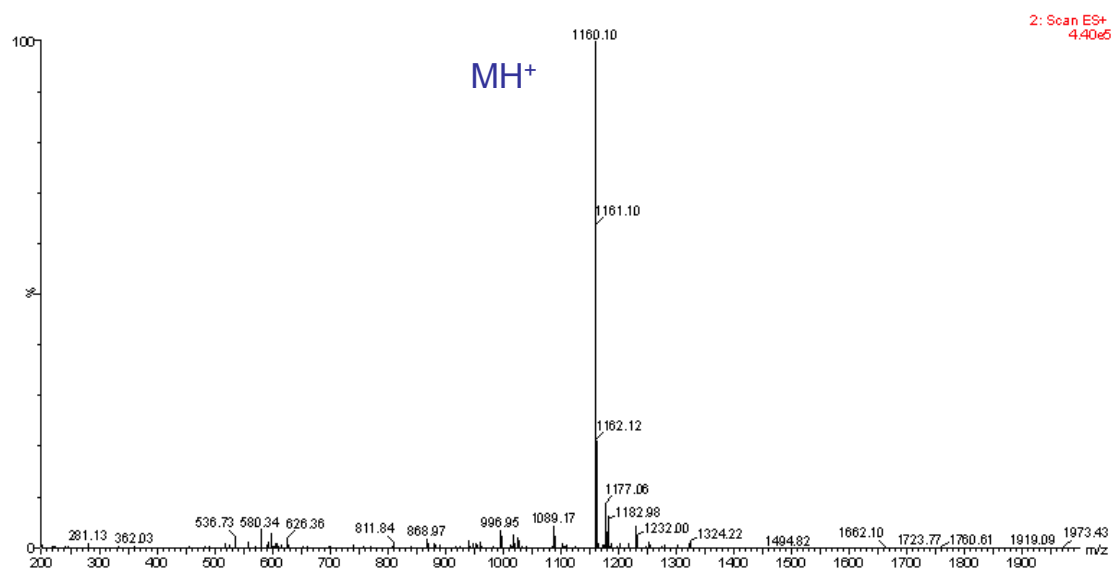

MALDI-TOF mass spectrum of peptide 20:

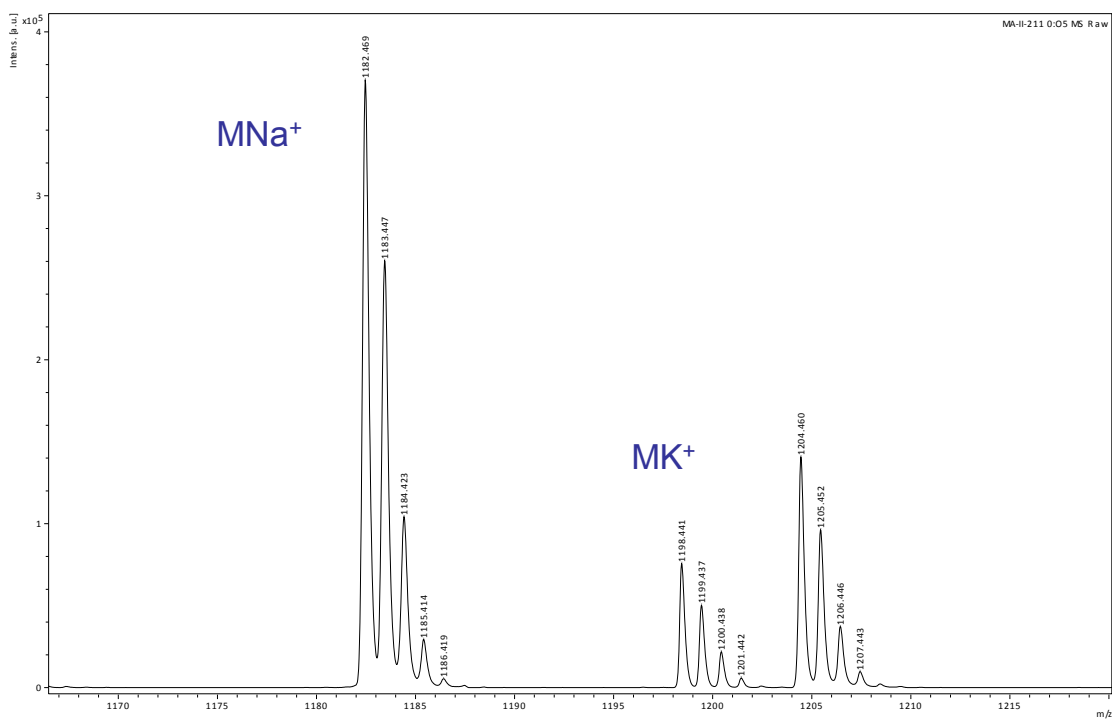

19 1) Oxyma, HBTU,  
+ DIPEA, DMF, rt, 8hrs  
20 2) TFA, rt, 24 hrs

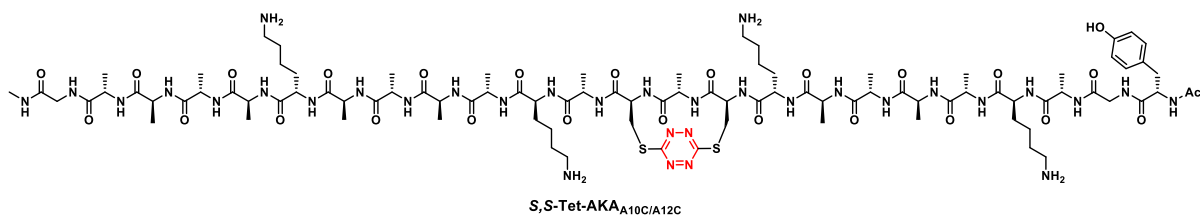

LC-MS chromatogram of peptide *S,S*-Tet-AKA<sub>A10C/A12C</sub>:

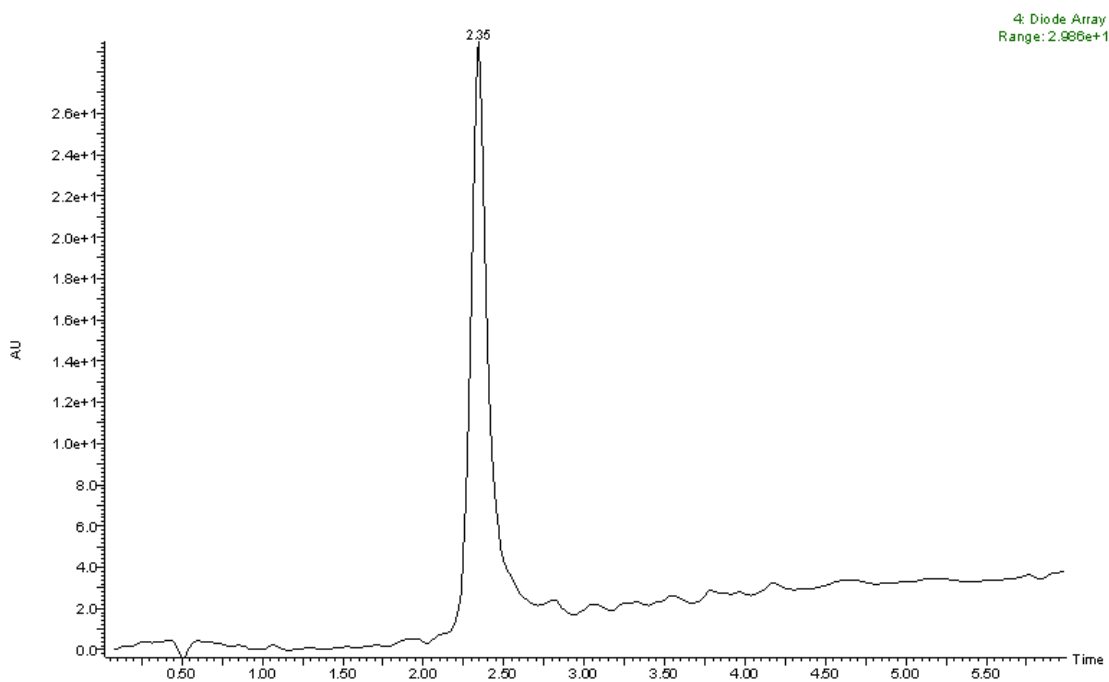

LC-MS mass spectrum of peptide *S,S*-Tet-AKA<sub>A10C/A12C</sub>:

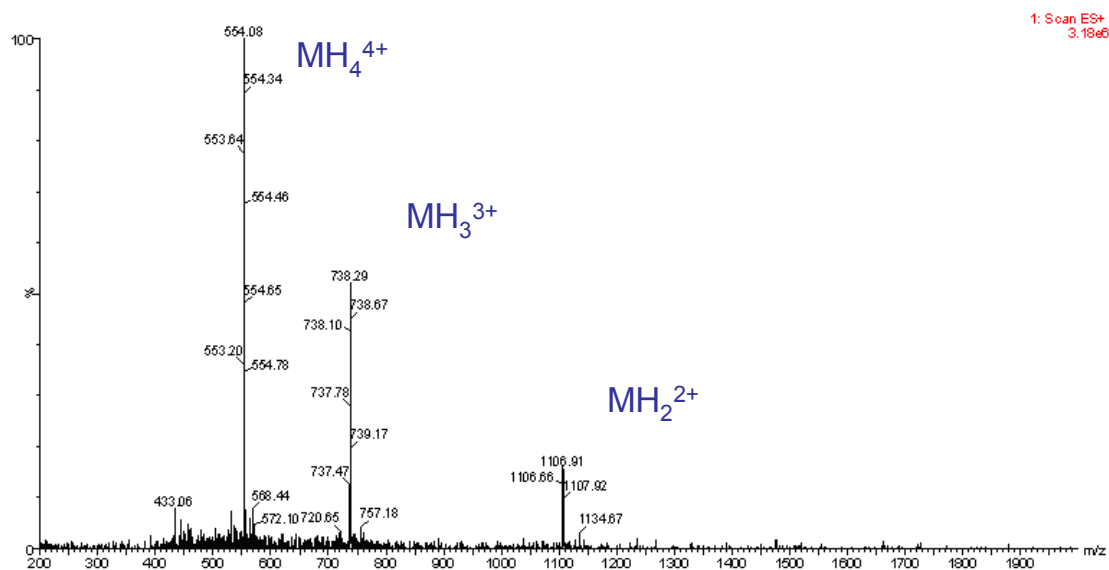

MALDI-TOF mass spectrum of peptide *S,S*-Tet-AKA<sub>A10C/A12C</sub>:

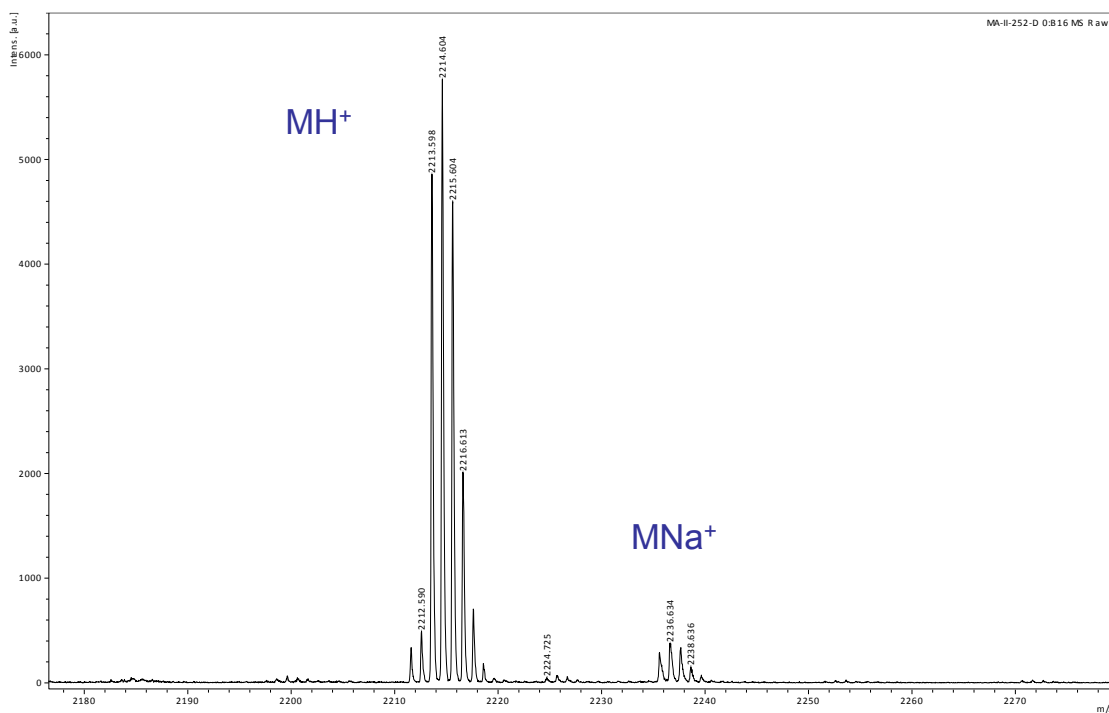

## Enriched $^{13}\text{C}/^{18}\text{O}$ Amide Containing Peptides

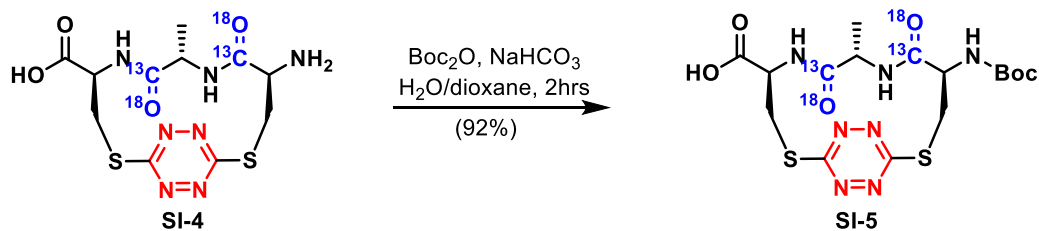

**Peptide SI-5.** A 25 mL round bottom flask was charged with **SI-4** (19.0 mg, 0.050 mmol) and  $\text{NaHCO}_3$  (10.5 mg, 0.125 mmol, 2.5 equiv) then dissolved in water (2.0 mL). A pre-mixed solution of  $\text{Boc}_2\text{O}$  (16.4 mg, 0.075 mmol, 1.5 equiv) dissolved in 1,4-dioxane (2.0 mL) was added dropwise over 15 min with stirring. After 2 h, completion of the reaction was observed by LC-MS and the reaction solution was directly purified by reverse-phase chromatography (gradient 10 – 80% organic over 10 min) to give 22.1 mg (92%) of **SI-5** as a red/orange amorphous powder after lyophilization: HRMS (ES)  $m/z$  478.1216 [(M-H) $^-$ ]; calcd for  $^{12}\text{C}_{14}^{13}\text{C}_2\text{H}_{22}\text{N}_7^{16}\text{O}_4^{18}\text{O}_2\text{S}_2$ : 478.1225].

LC-MS chromatogram of peptide **SI-5**:

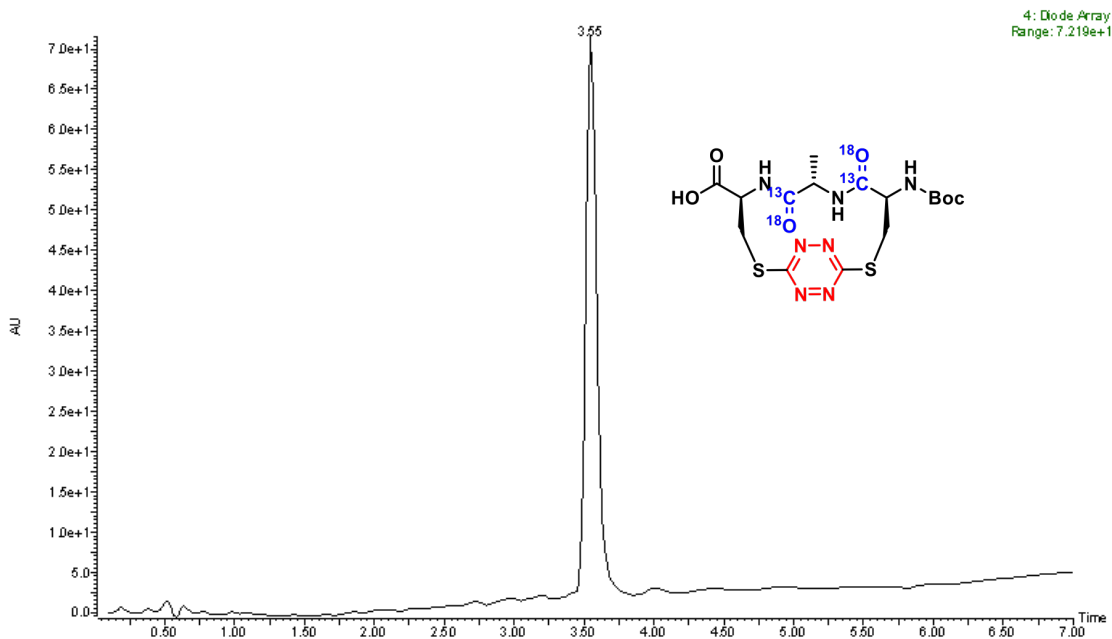

LC-MS mass spectrum of peptide **SI-5**:

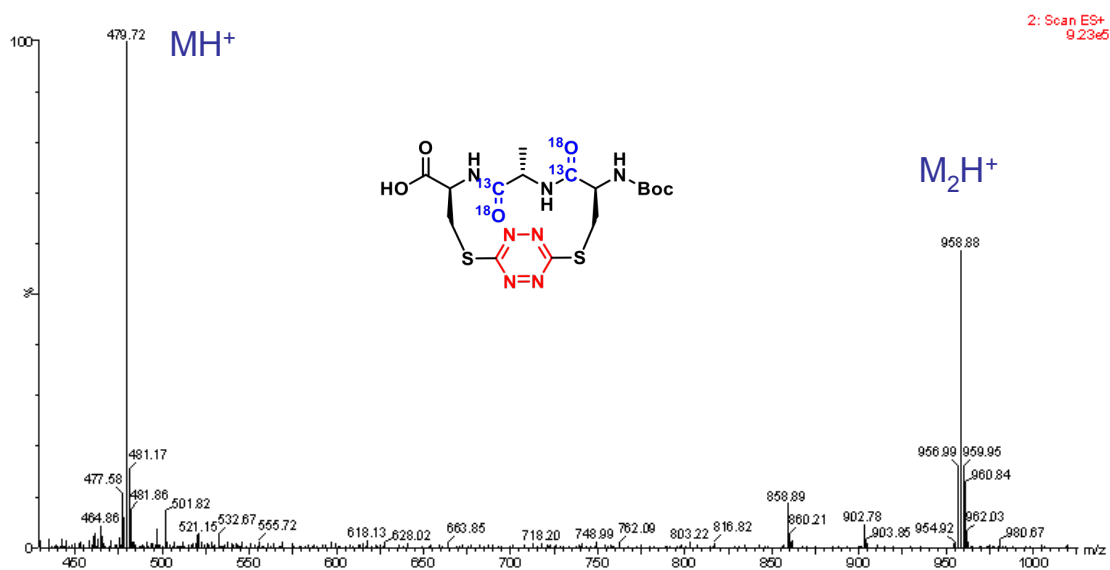

LC-MS chromatograms comparing peptide **17** to enriched peptide **SI-5**:

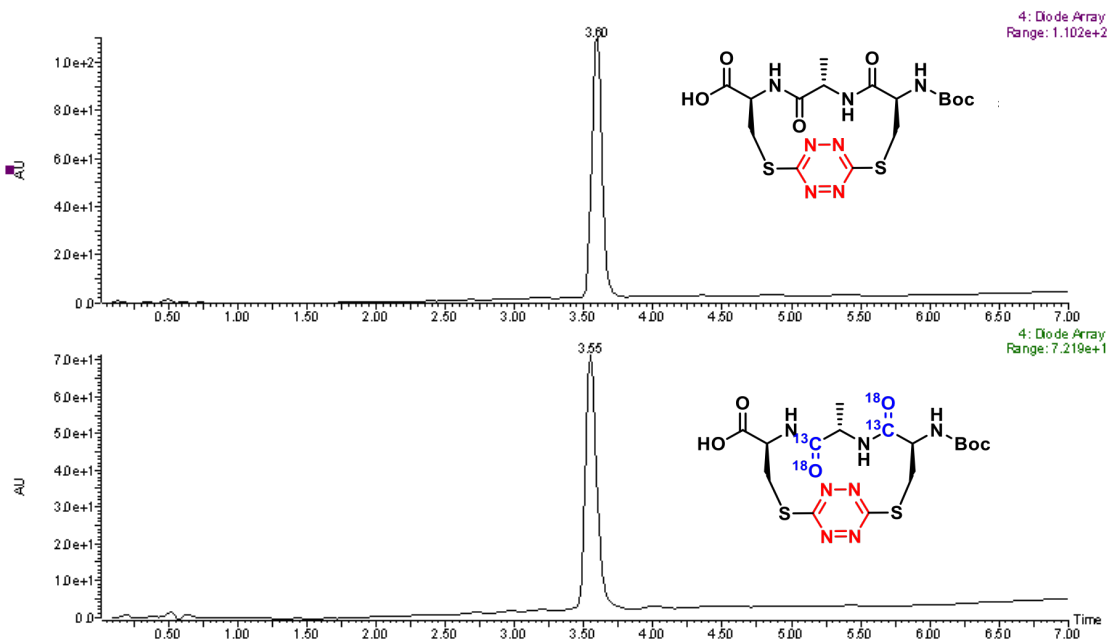

LC-MS mass spectra comparing peptide **17** to enriched peptide **SI-5**:

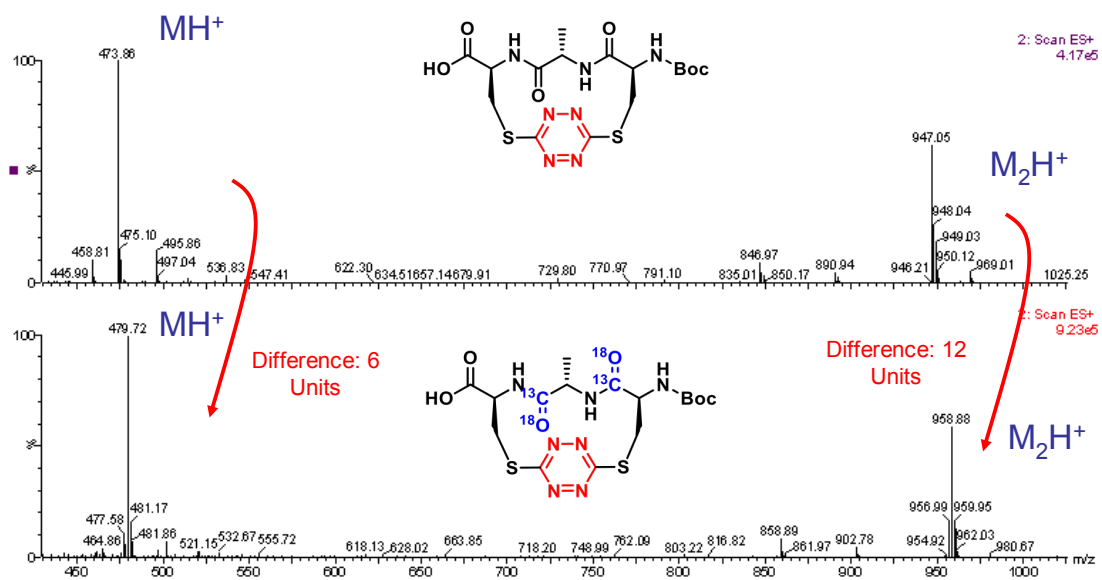



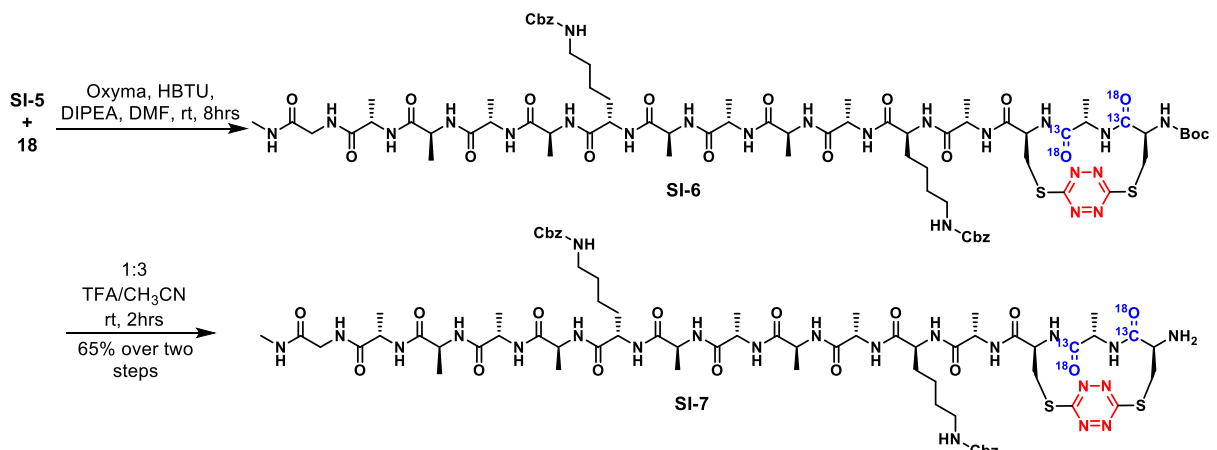

**Peptide SI-7.** HRMS (ES)  $m/z$  1613.7458  $[(M+H)^+]$ ; calcd for  $^{12}\text{C}_{67}^{13}\text{C}_2\text{H}_{103}\text{N}_{22}^{16}\text{O}_{17}^{18}\text{O}_2\text{S}_2$ : 1613.7363]; MALDI-TOF  $m/z$  1636.069  $[(M+\text{Na})^+]$ ; calcd for  $^{12}\text{C}_{67}^{13}\text{C}_2\text{H}_{102}\text{N}_{22}^{16}\text{O}_{17}^{18}\text{O}_2\text{NaS}_2$ : 1635.7183].

LC-MS chromatogram of peptide SI-7:

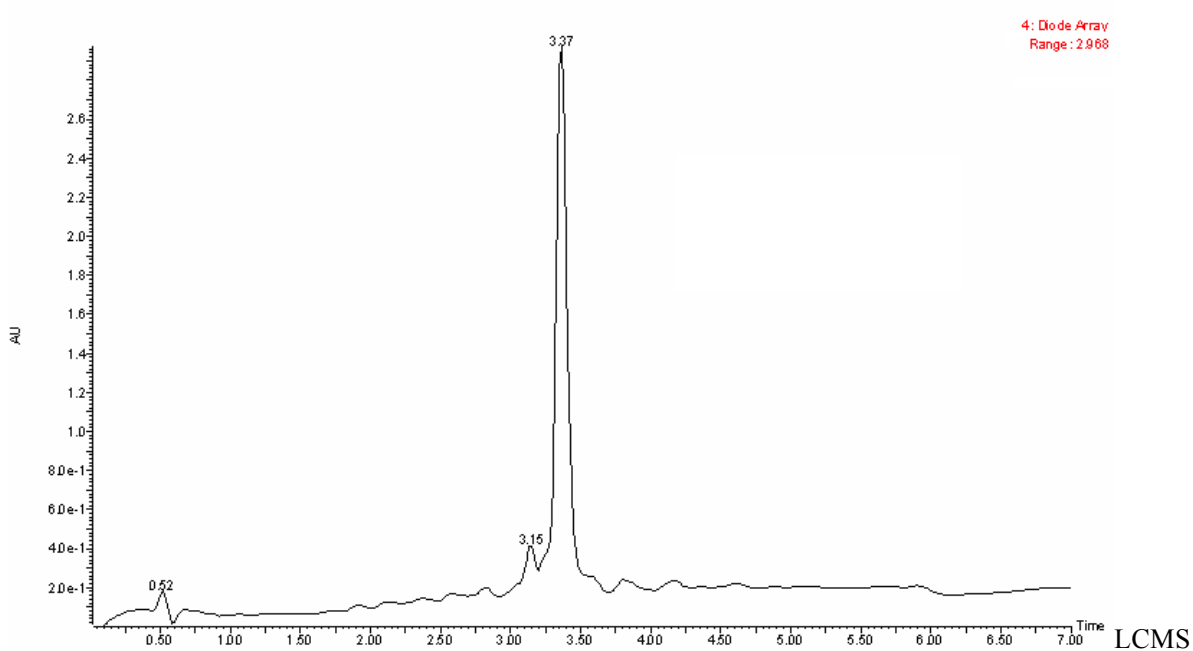

LC-MS mass spectrum of peptide SI-7:

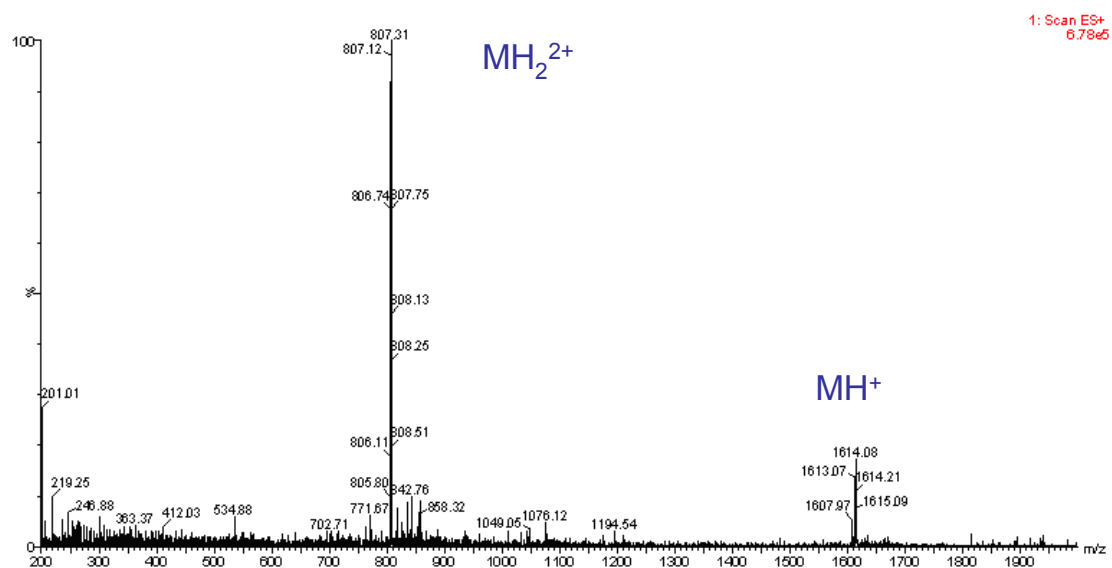

MALDI-TOF mass spectrum of peptide SI-7:

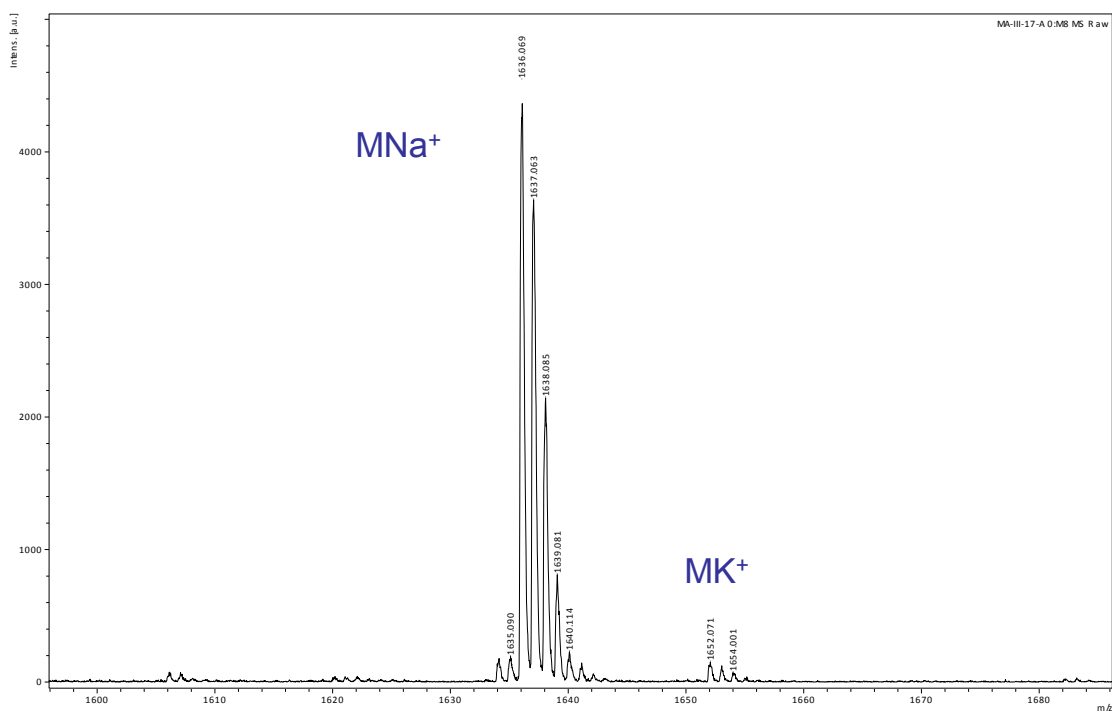

LC-MS chromatograms comparing peptide 19 to enriched peptide SI-7:

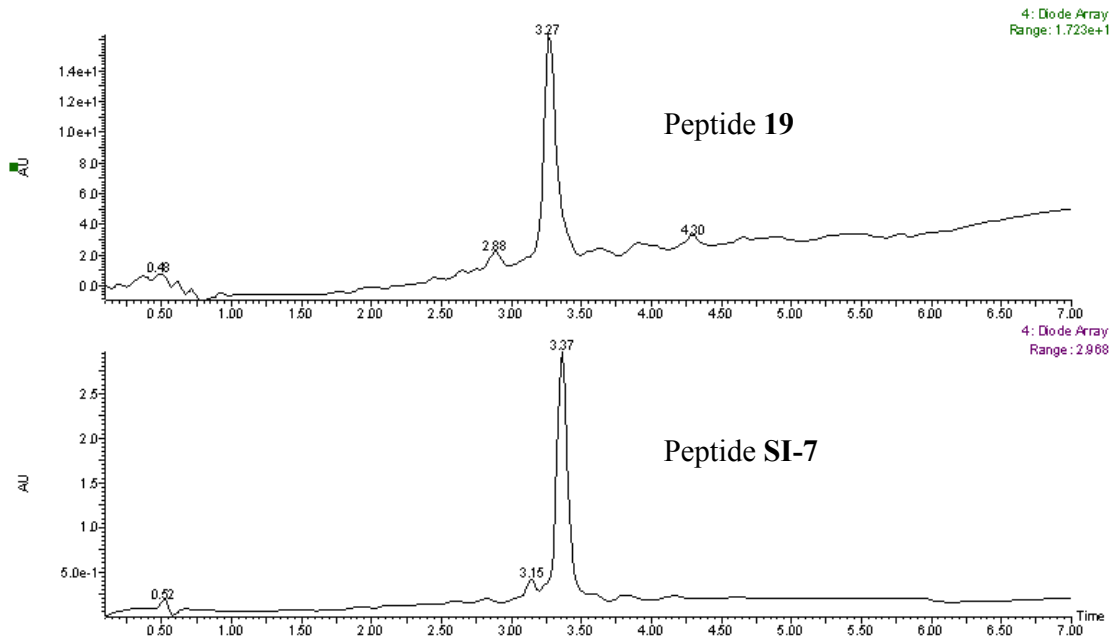

LC-MS mass spectra comparing peptide 19 to enriched peptide SI-7:

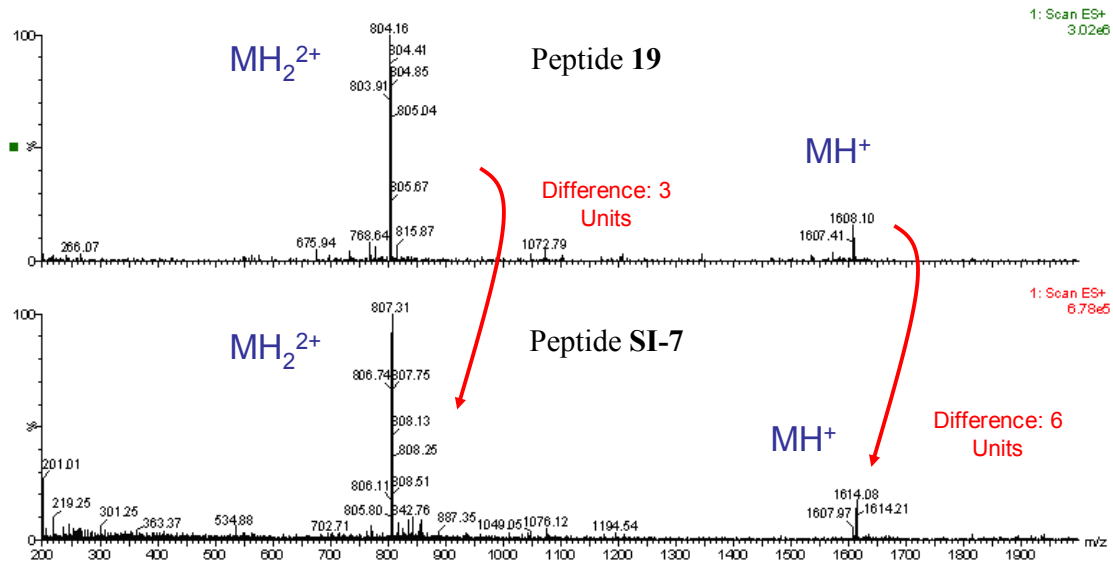

MALDI-TOF mass spectra comparing peptide **19** to enriched peptide **SI-7**:

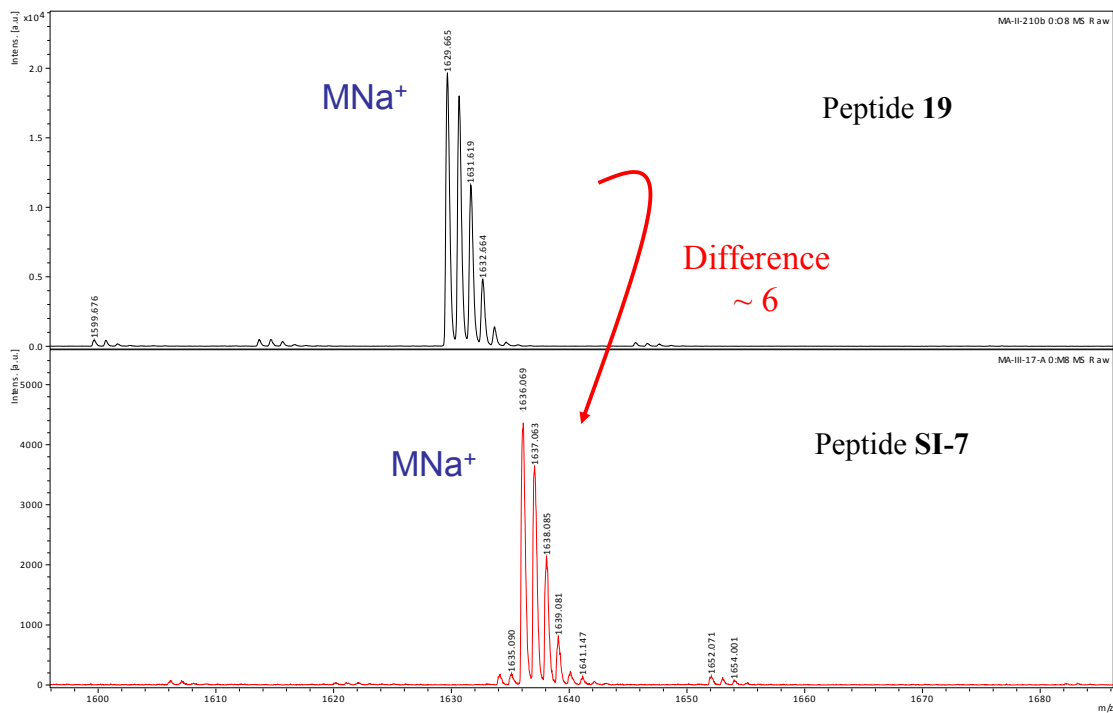

SI-7 + 20  
 1) Oxyma, HBTU, DIPEA, DMF, rt, 8hrs  
 2) TFA, rt, 24 hrs  
 22% over two steps

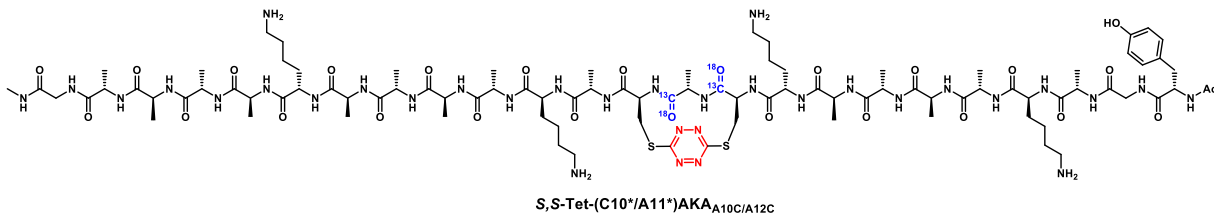

LC-MS chromatogram of peptide *S,S*-Tet-(C10\*/A11\*)AKA<sub>A10C/A12C</sub>:

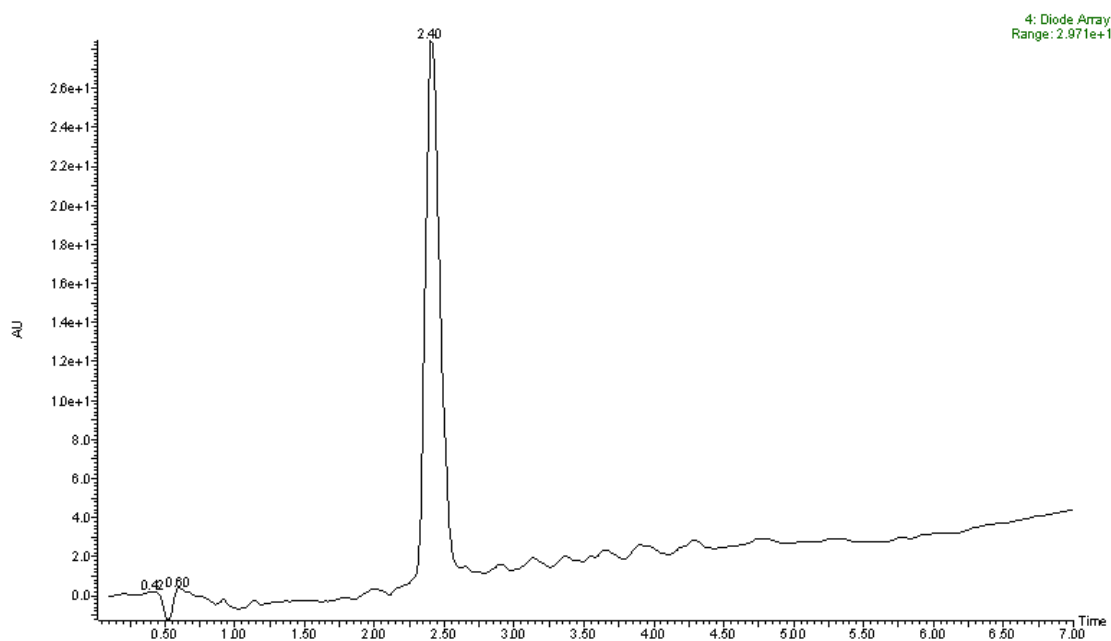

LC-MS mass spectrum of peptide *S,S*-Tet-(C10\*/A11\*)AKA<sub>A10C/A12C</sub>:

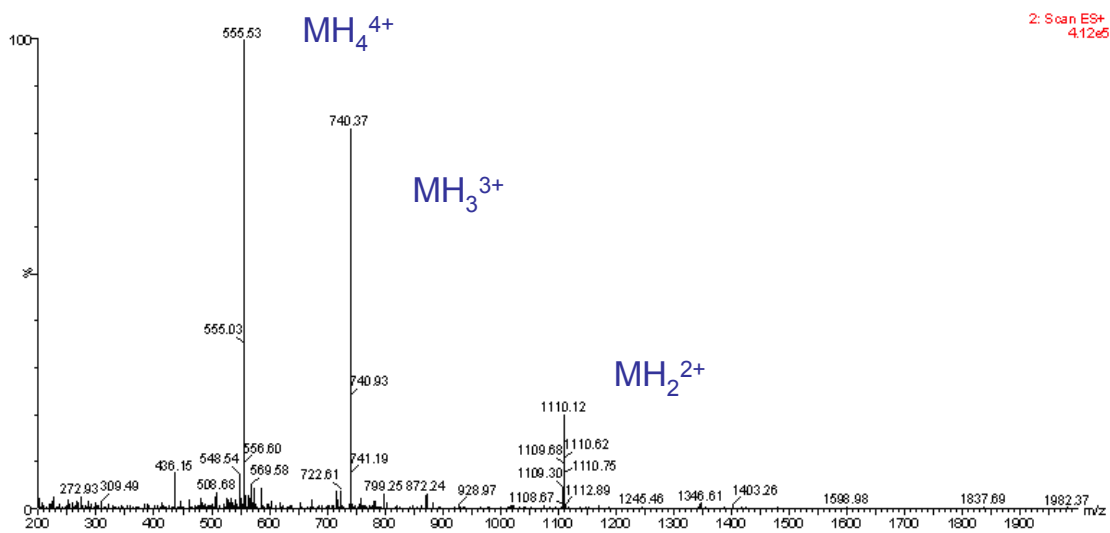

MALDI-TOF mass spectrum of peptide *S,S*-Tet-(C10\*/A11\*)AKA<sub>A10C/A12C</sub>:

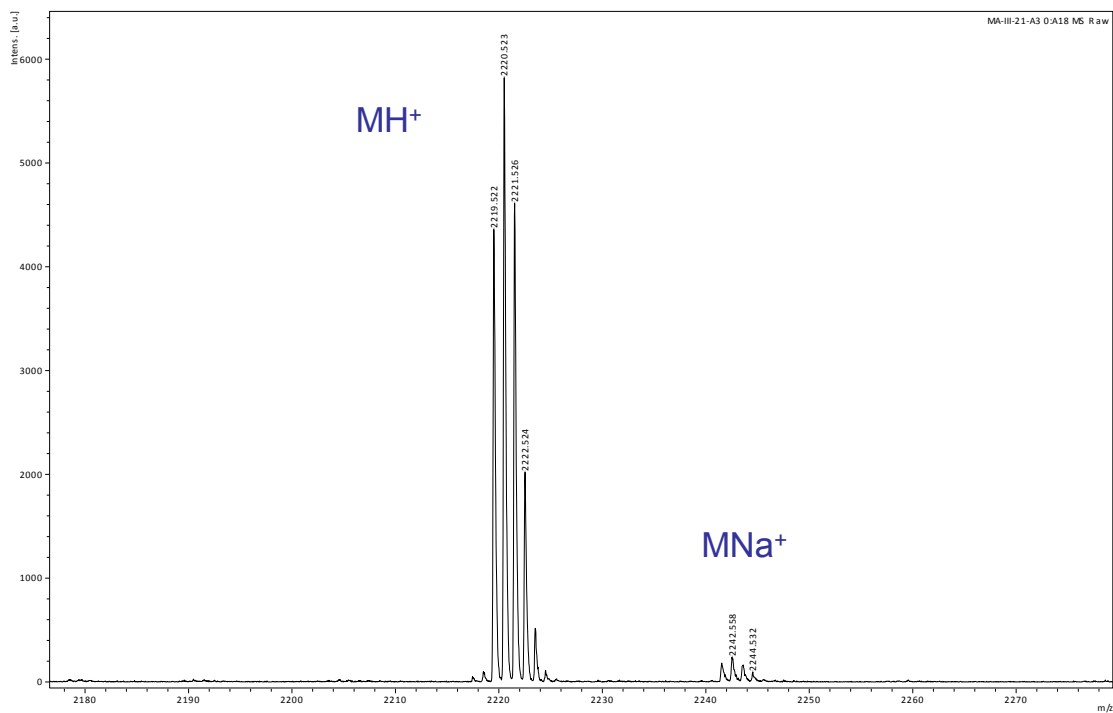

LC-MS chromatograms comparing peptide *S,S*-Tet-AKA<sub>A10C/A12C</sub> to enriched peptide *S,S*-Tet-(C10\*/A11\*)AKA<sub>A10C/A12C</sub>:

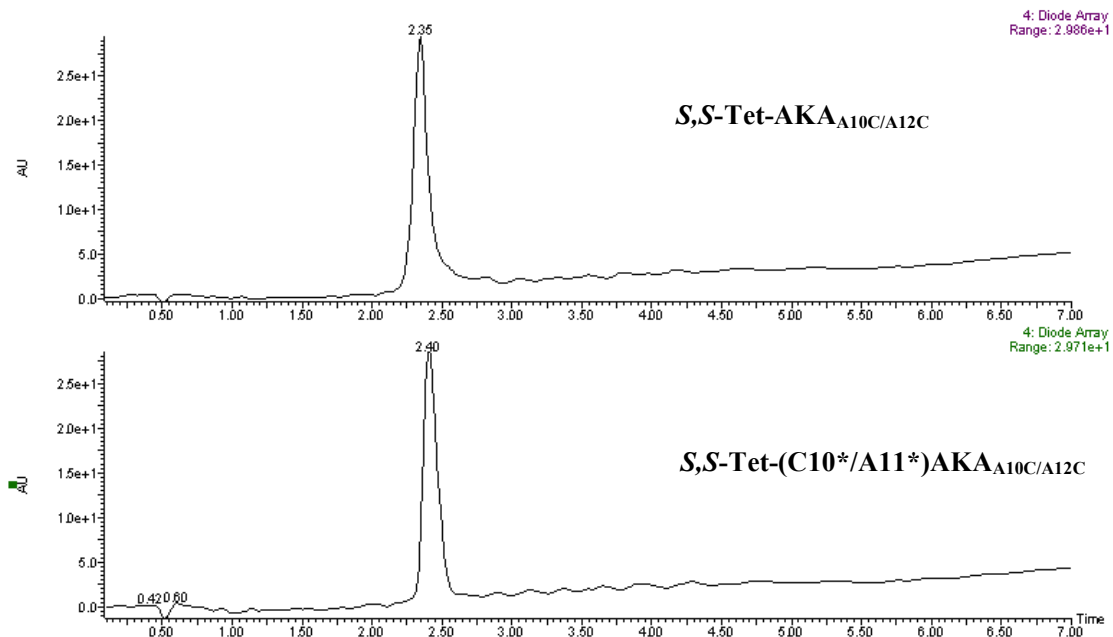

LC-MS mass spectra comparing peptide *S,S*-Tet- $\text{AKA}_{\text{A10C/A12C}}$  to enriched peptide *S,S*-Tet-( $\text{C10}^*/\text{A11}^*$ ) $\text{AKA}_{\text{A10C/A12C}}$ :

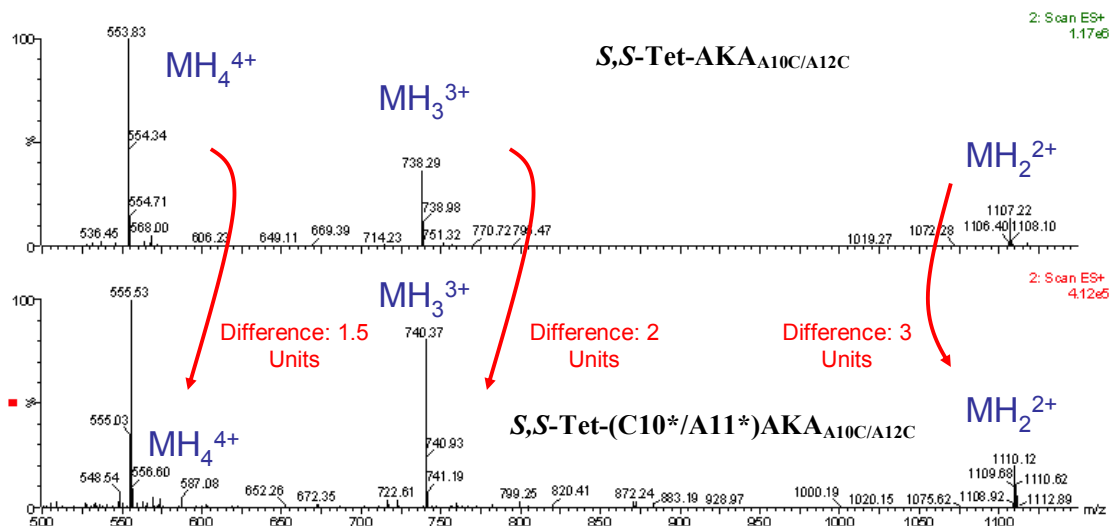

MALDI-TOF comparing peptide *S,S*-Tet- $\text{AKA}_{\text{A10C/A12C}}$  to enriched peptide *S,S*-Tet-( $\text{C10}^*/\text{A11}^*$ ) $\text{AKA}_{\text{A10C/A12C}}$ :

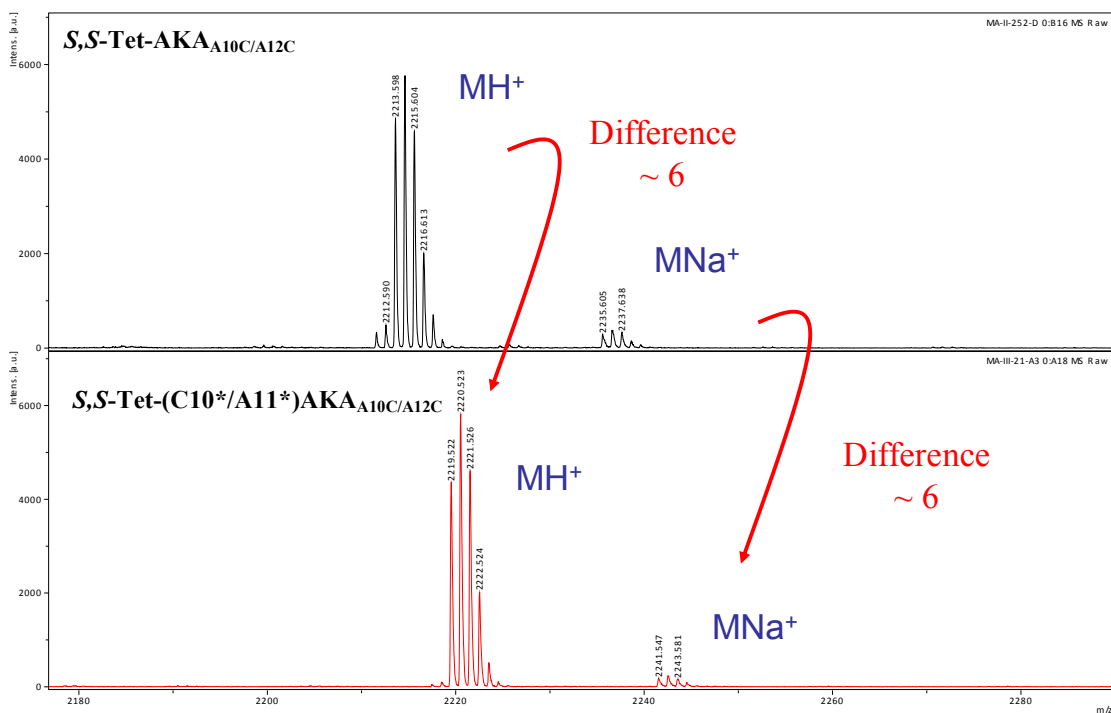

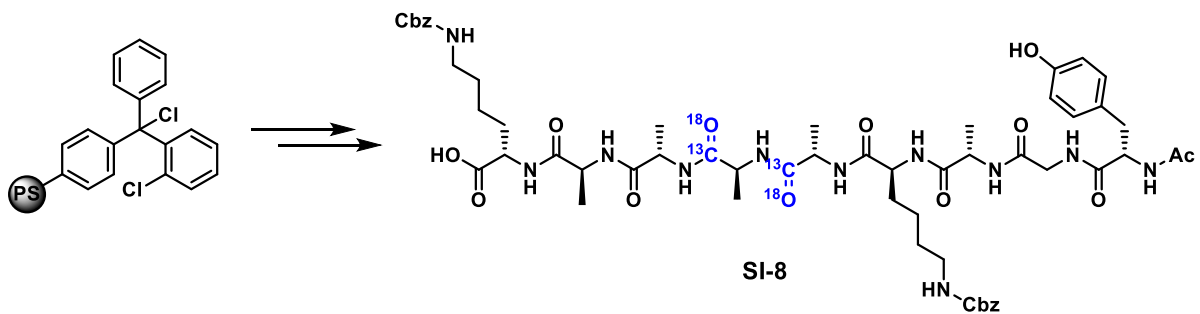

**Peptide SI-8.** HRMS (ES)  $m/z$  1166.5781 [(M+H)<sup>+</sup>; calcd for C<sub>54</sub><sup>13</sup>C<sub>2</sub>H<sub>78</sub>N<sub>11</sub>O<sub>14</sub><sup>18</sup>O<sub>2</sub>: 1166.5780];

MALDI-TOF  $m/z$  1188.919 [(M+Na)<sup>+</sup>; calcd for C<sub>54</sub><sup>13</sup>C<sub>2</sub>H<sub>77</sub>N<sub>11</sub>O<sub>14</sub><sup>18</sup>O<sub>2</sub>Na: 1188.5560].

LC-MS chromatogram of peptide **SI-8**:

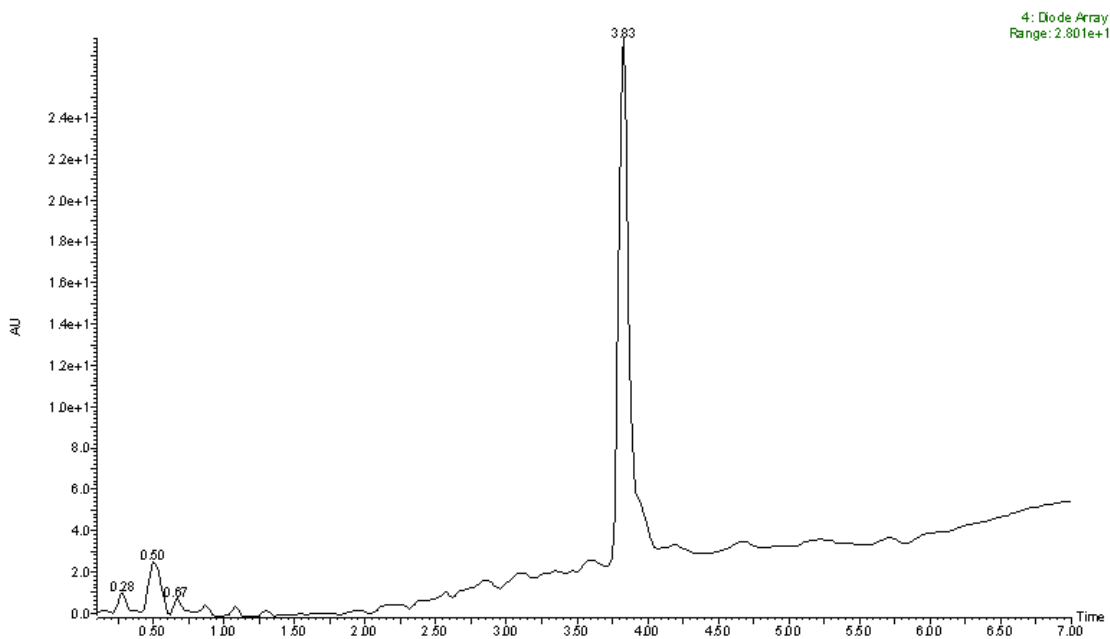



LC-MS mass spectrum of peptide **SI-8**:

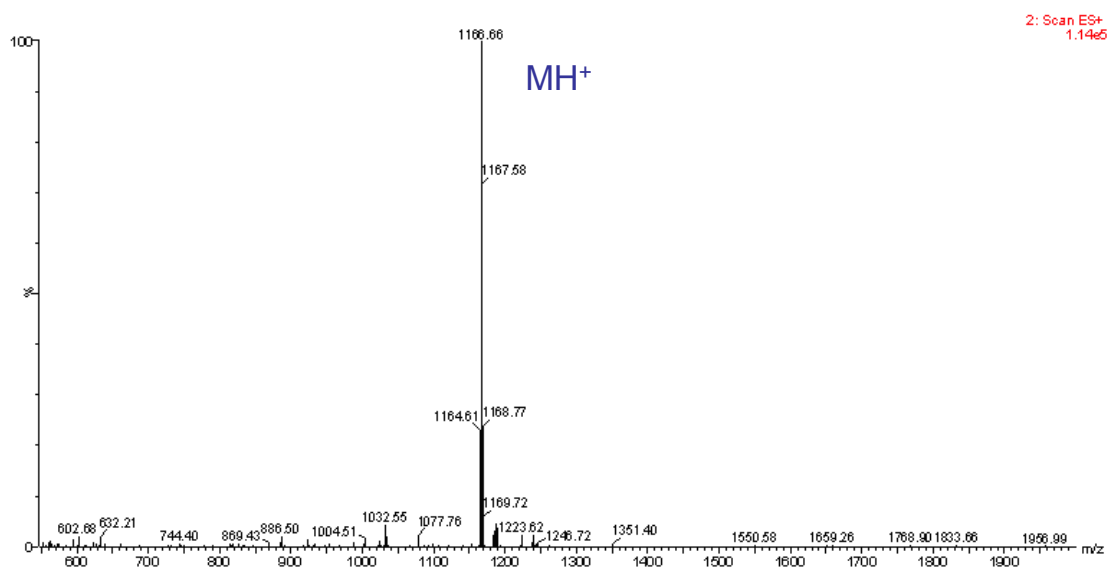

MALDI-TOF mass spectrum of peptide **SI-8**:

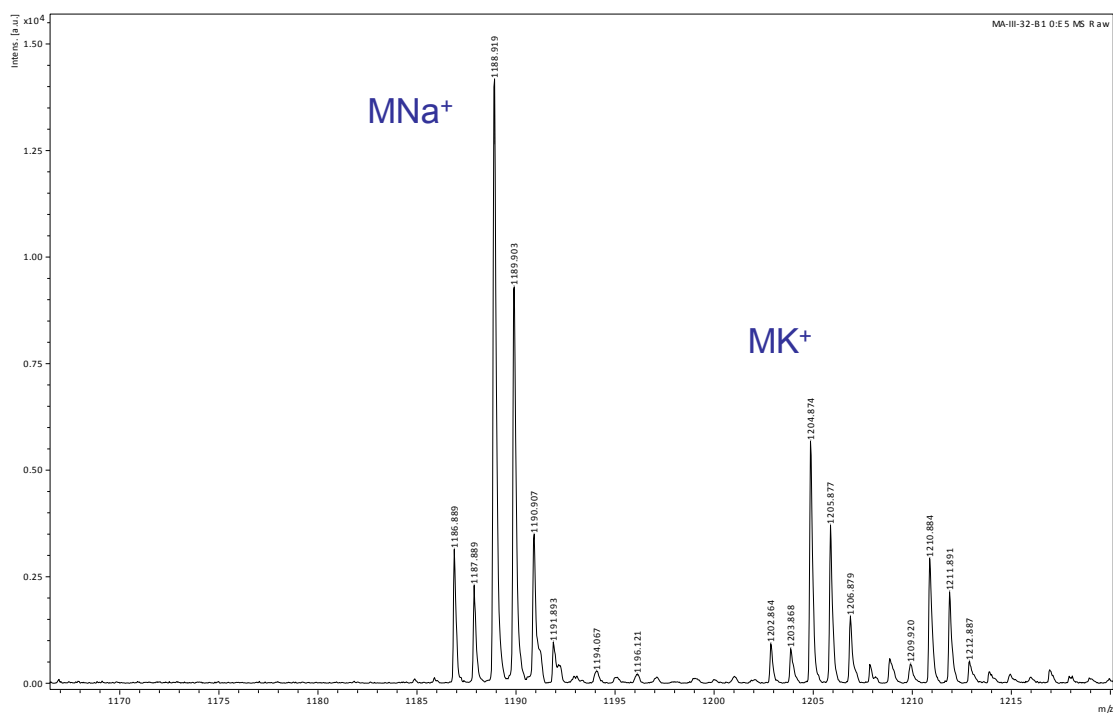

LC-MS chromatograms comparing peptide **20** to enriched peptide **SI-8**:

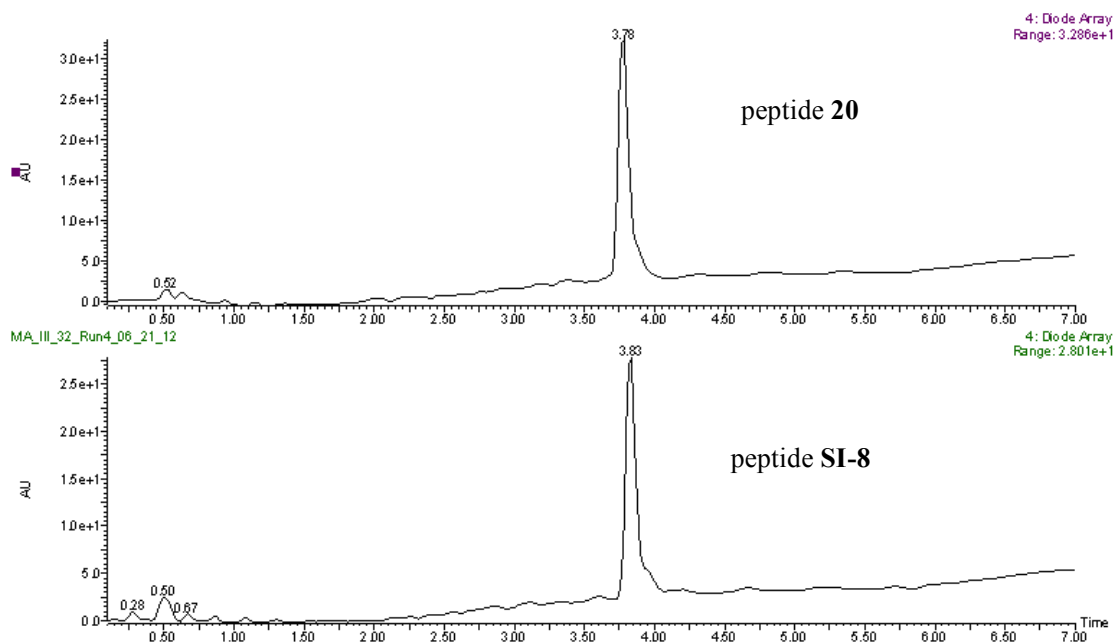

LC-MS mass spectra comparing peptide **20** to enriched peptide **SI-8**:

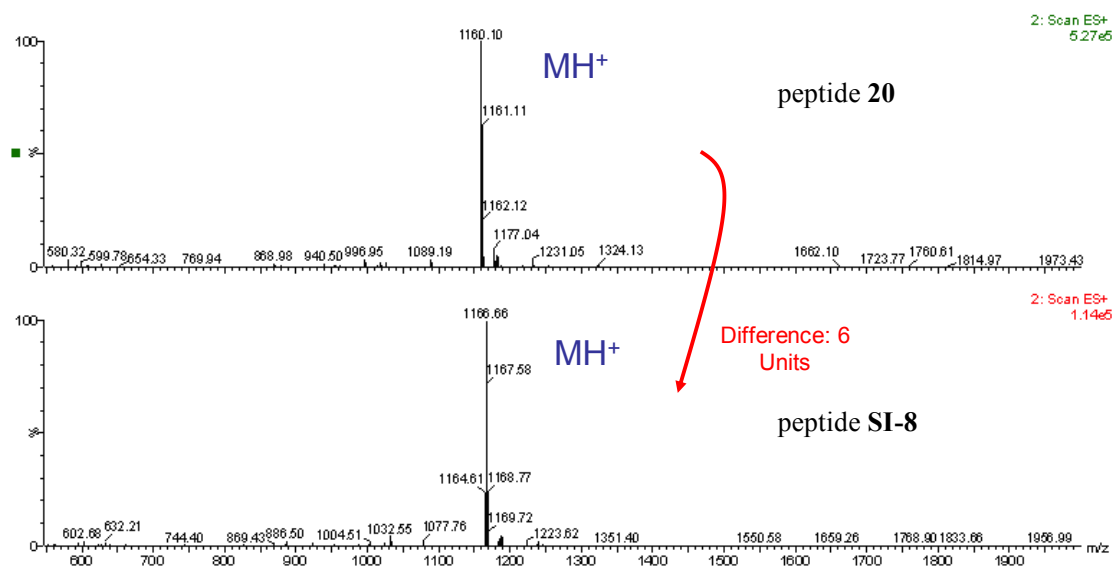

MALDI-TOF mass spectra comparing peptide **20** to enriched peptide **SI-8**:

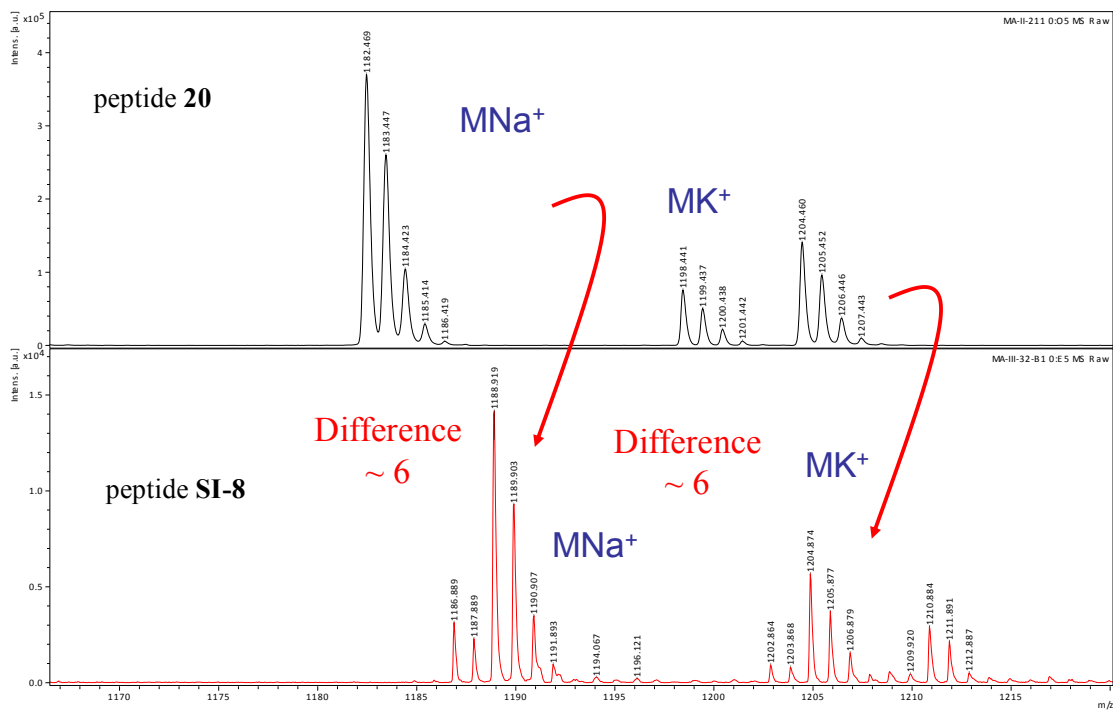

19 + SI-8  
 1) Oxyma, HBTU, DIPEA, DMF, rt, 8hrs  
 2) TFA, rt, 24 hrs  
 25% over two steps

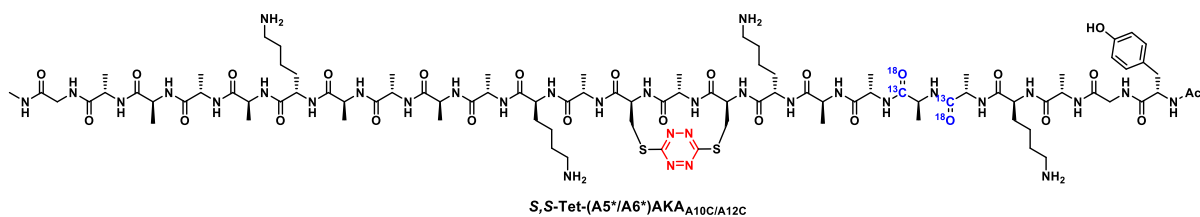

LC-MS chromatogram of peptide *S,S*-Tet-(A5\*/A6\*)AKA<sub>A10C/A12C</sub>:

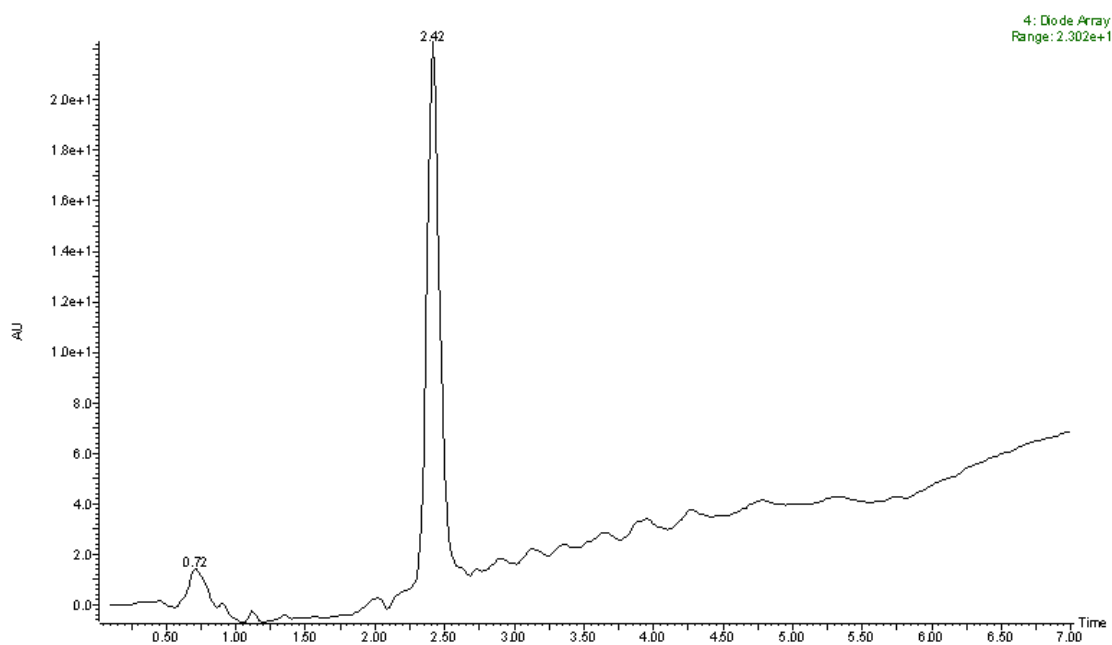

LC-MS mass spectrum of peptide *S,S*-Tet-(A5\*/A6\*)AKA<sub>A10C/A12C</sub>:

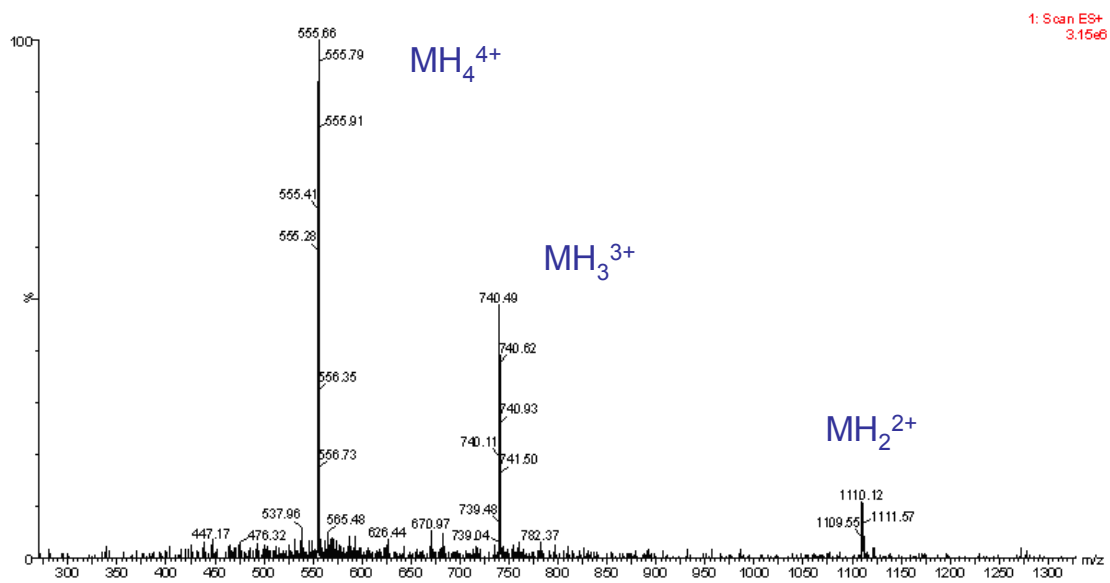

MALDI-TOF mass spectrum of peptide *S,S*-Tet-(A5\*/A6\*)AKA<sub>A10C/A12C</sub>:

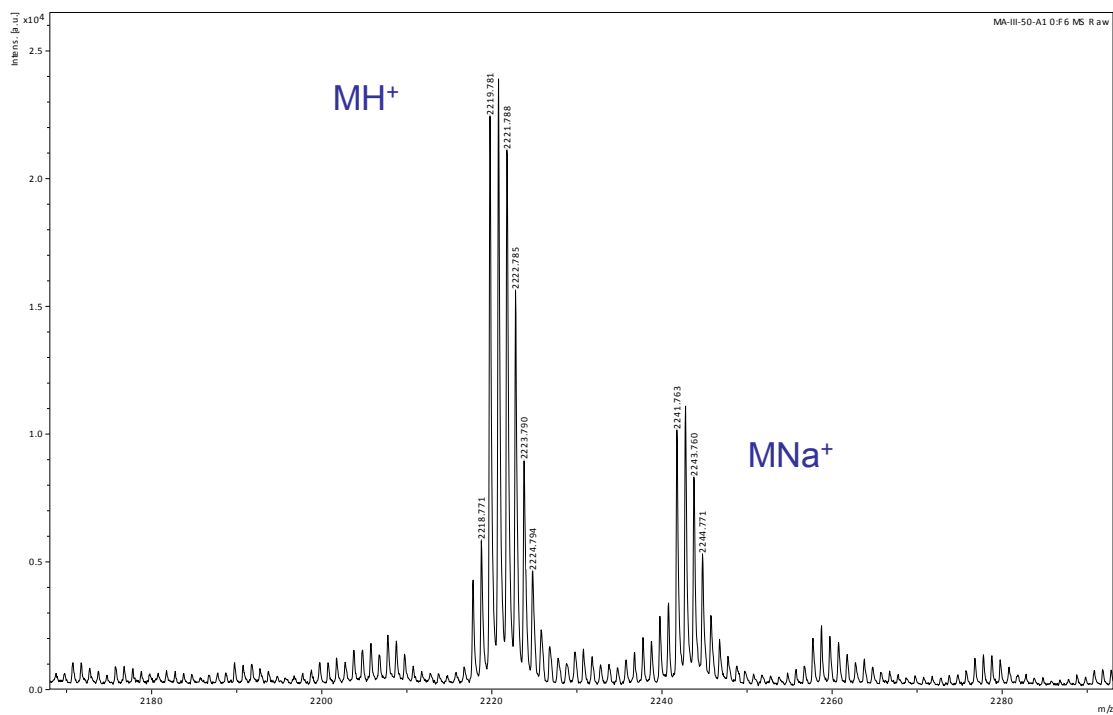

LC-MS chromatograms comparing peptide  $S,S$ -Tet- $AKA_{A10C/A12C}$  to enriched peptide  $S,S$ -Tet- $(A5^*/A6^*)AKA_{A10C/A12C}$ :

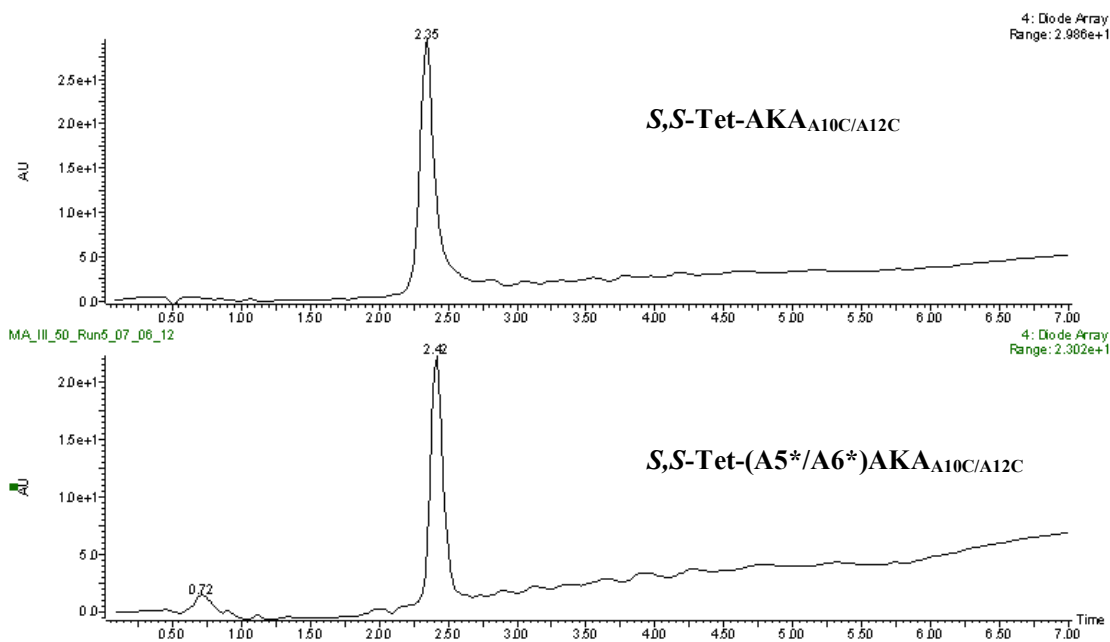

LC-MS mass spectra comparing peptide  $S,S$ -Tet- $AKA_{A10C/A12C}$  to enriched peptide  $S,S$ -Tet- $(A5^*/A6^*)AKA_{A10C/A12C}$ :

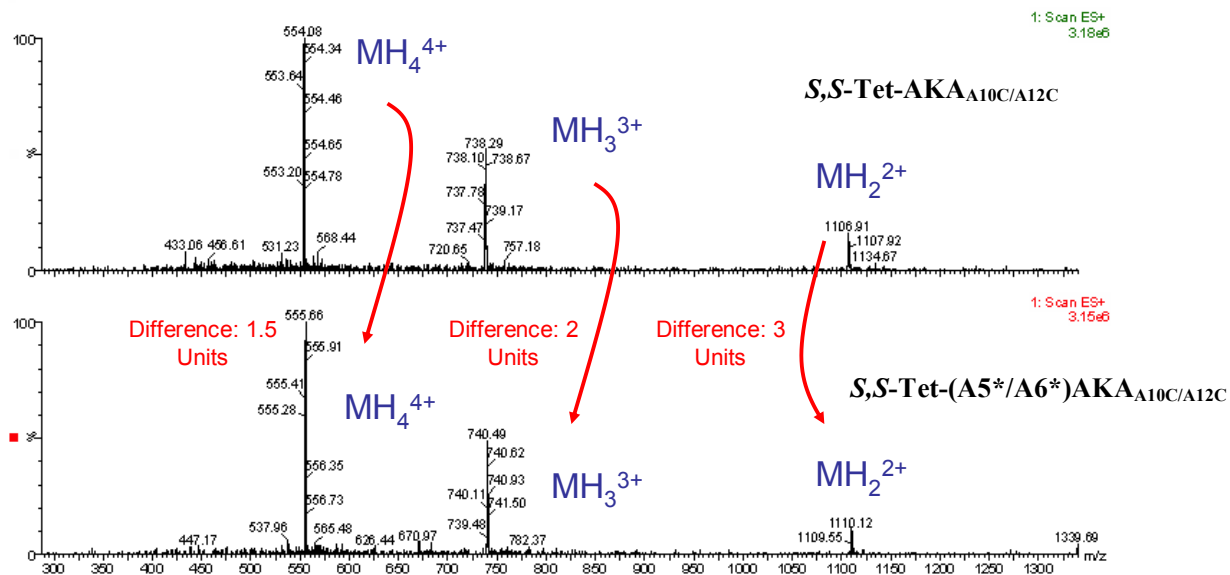



LC-MS chromatogram of peptide SI-9:

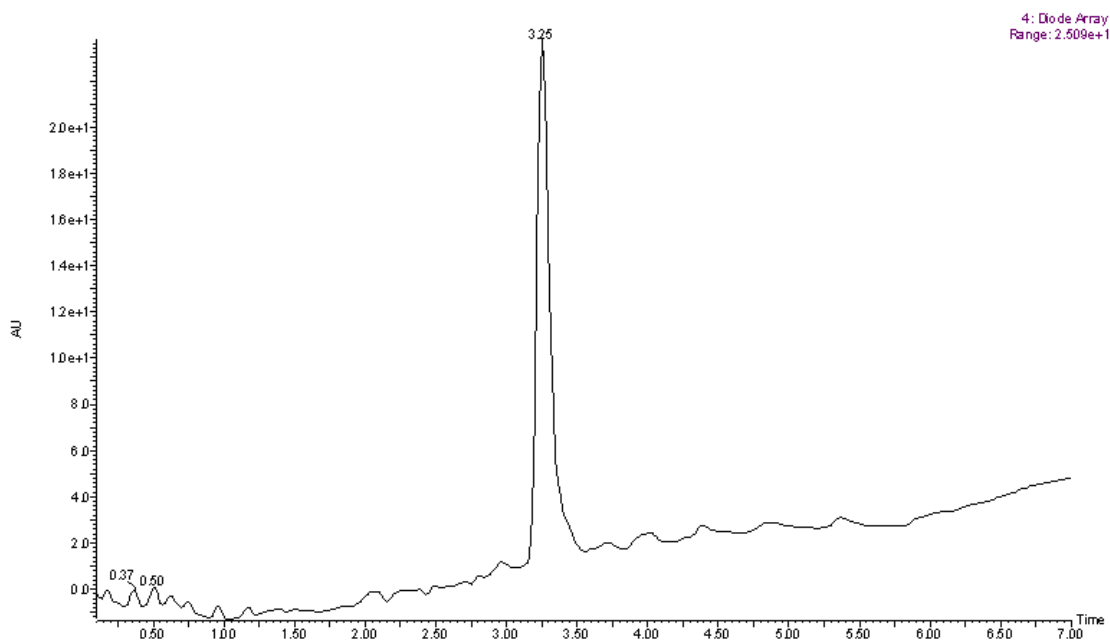

LC-MS mass spectrum of peptide SI-9:

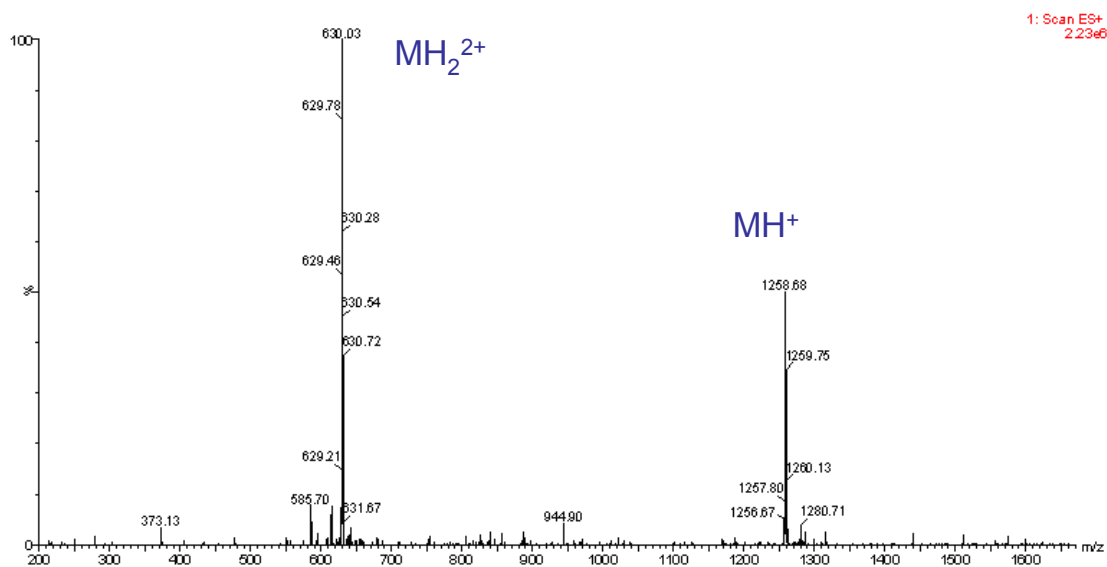



MALDI-TOF mass spectrum of peptide **SI-9**:

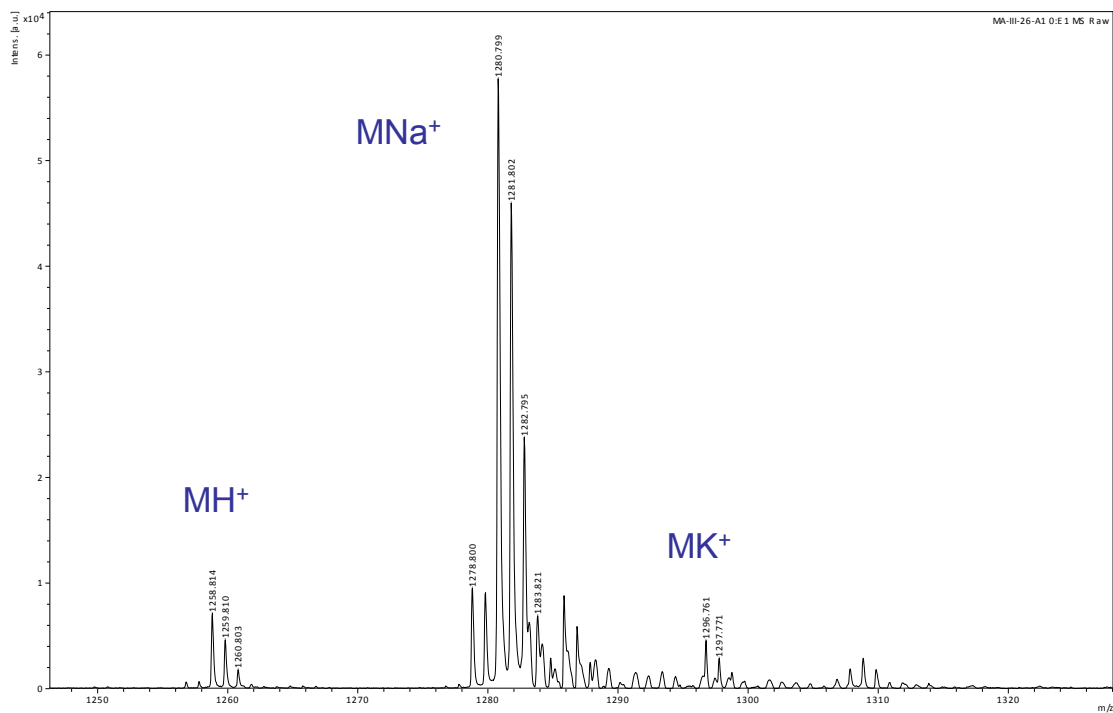

LC-MS chromatograms comparing peptide **18** to enriched peptide **SI-9**:

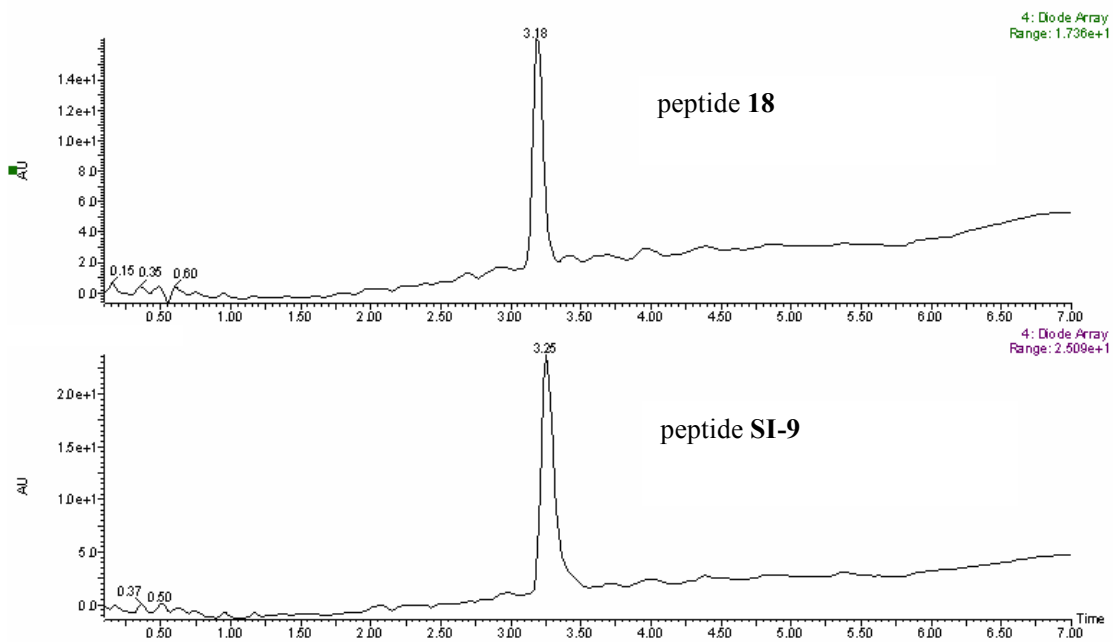

LC-MS mass spectra comparing peptide **18** to enriched peptide **SI-9**:

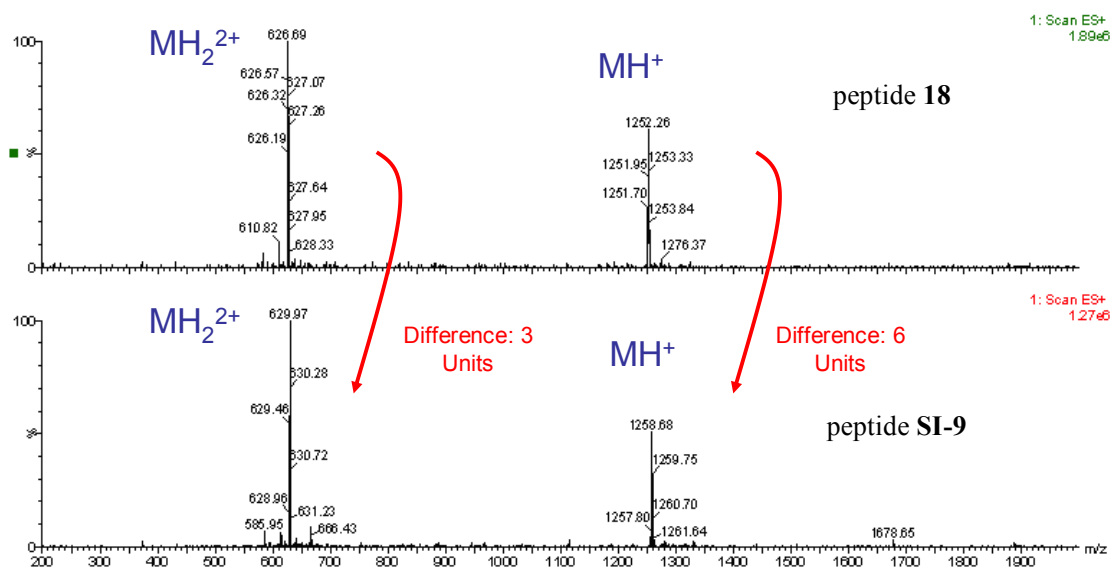

MALDI-TOF mass spectra comparing peptide **18** to enriched peptide **SI-9**:

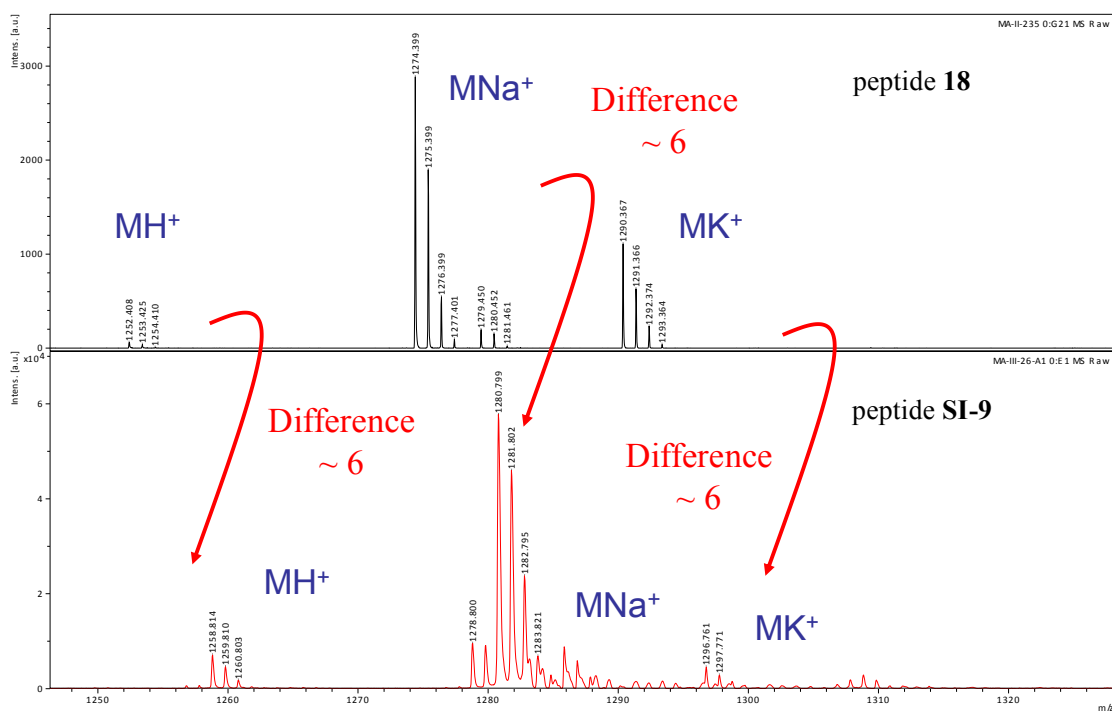

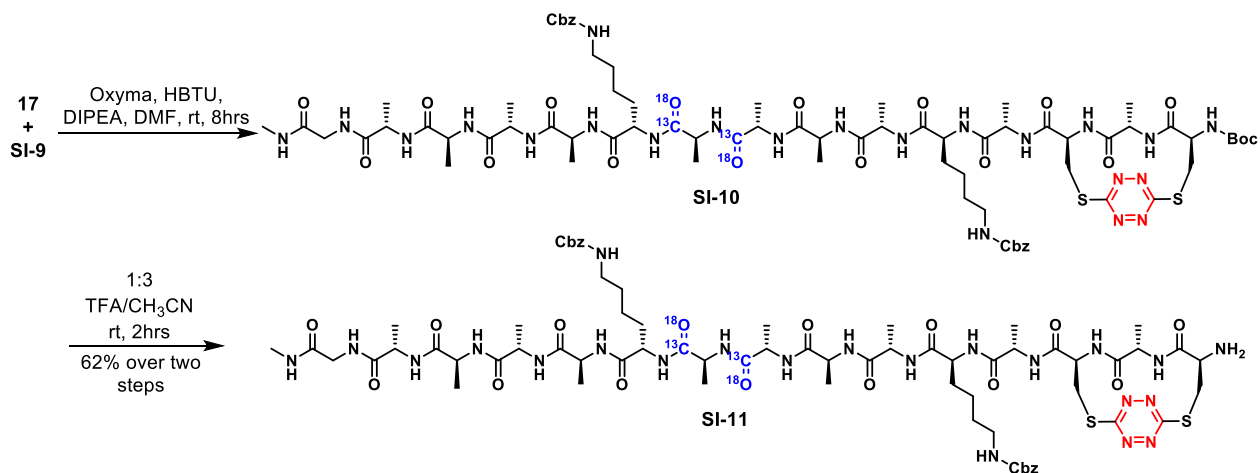

**Peptide SI-11.** HRMS (ES)  $m/z$  1635.7179 [(M+Na)<sup>+</sup>; calcd for <sup>12</sup>C<sub>67</sub><sup>13</sup>C<sub>2</sub>H<sub>102</sub>N<sub>22</sub><sup>16</sup>O<sub>17</sub><sup>18</sup>O<sub>2</sub>NaS<sub>2</sub>: 1635.7183]; MALDI-TOF  $m/z$  1636.208 [(M+Na)<sup>+</sup>; calcd for <sup>12</sup>C<sub>67</sub><sup>13</sup>C<sub>2</sub>H<sub>102</sub>N<sub>22</sub><sup>16</sup>O<sub>17</sub><sup>18</sup>O<sub>2</sub>NaS<sub>2</sub>: 1635.7183].

LC-MS chromatogram of peptide **SI-11**:

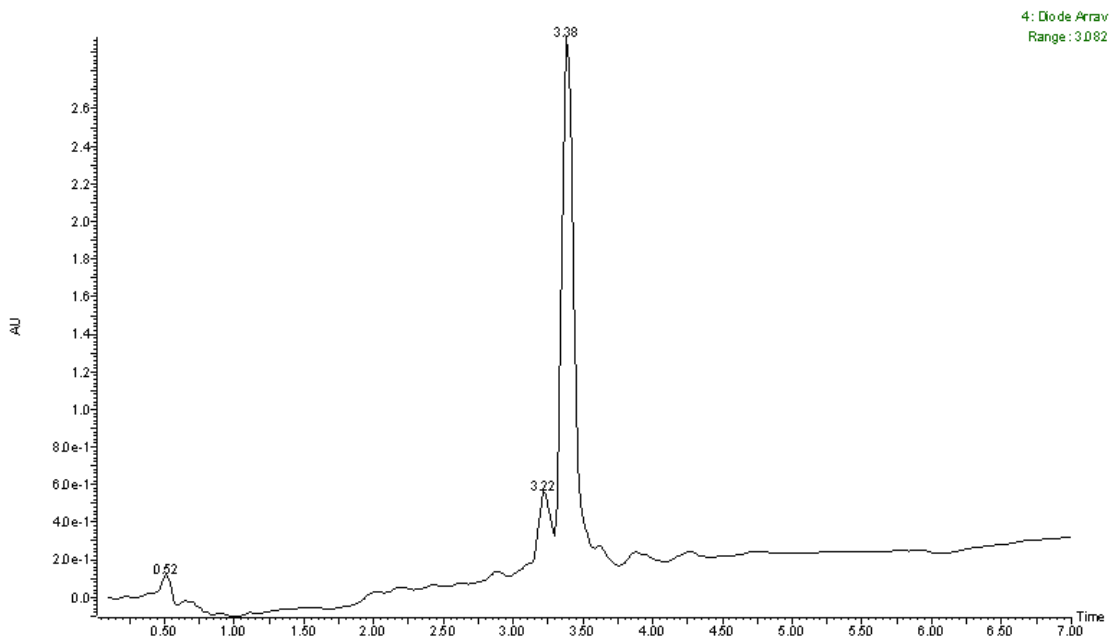

LC-MS mass spectrum of peptide SI-11:

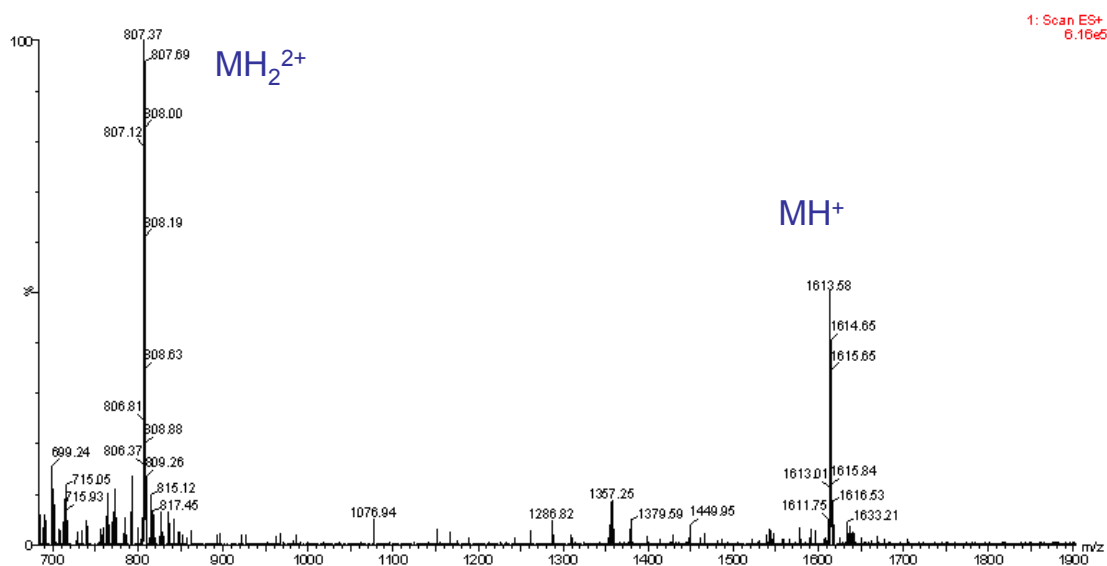

MALDI-TOF mass spectrum of peptide SI-11:

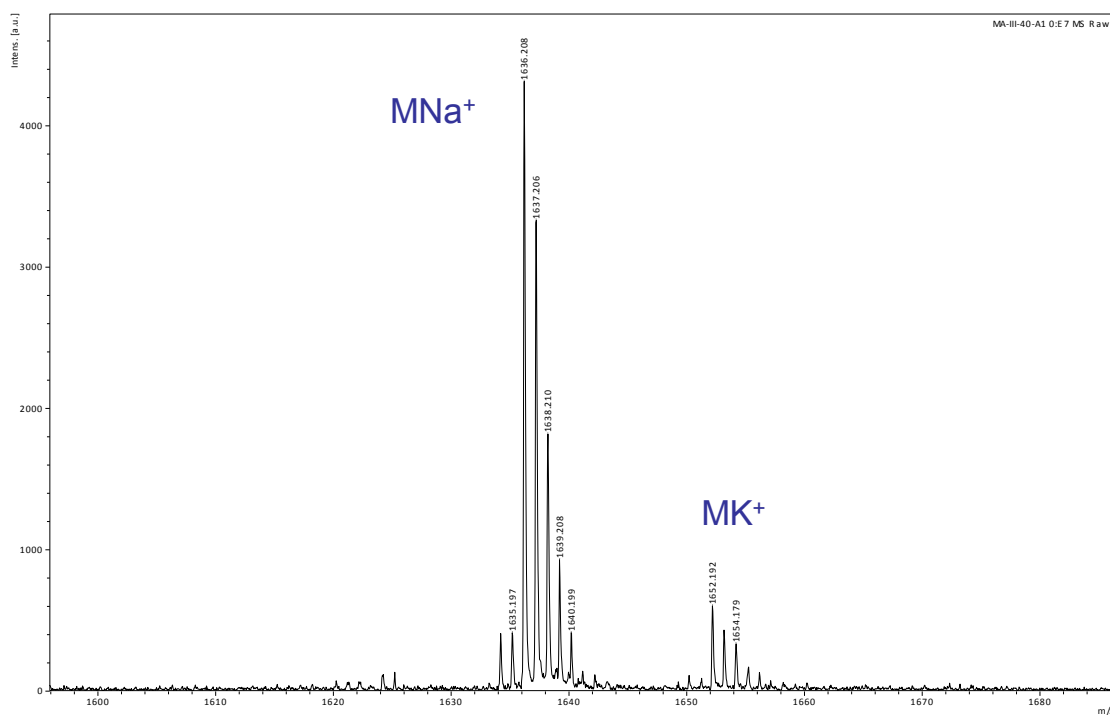

LC-MS chromatograms comparing peptide **19** to enriched peptide **SI-11**:

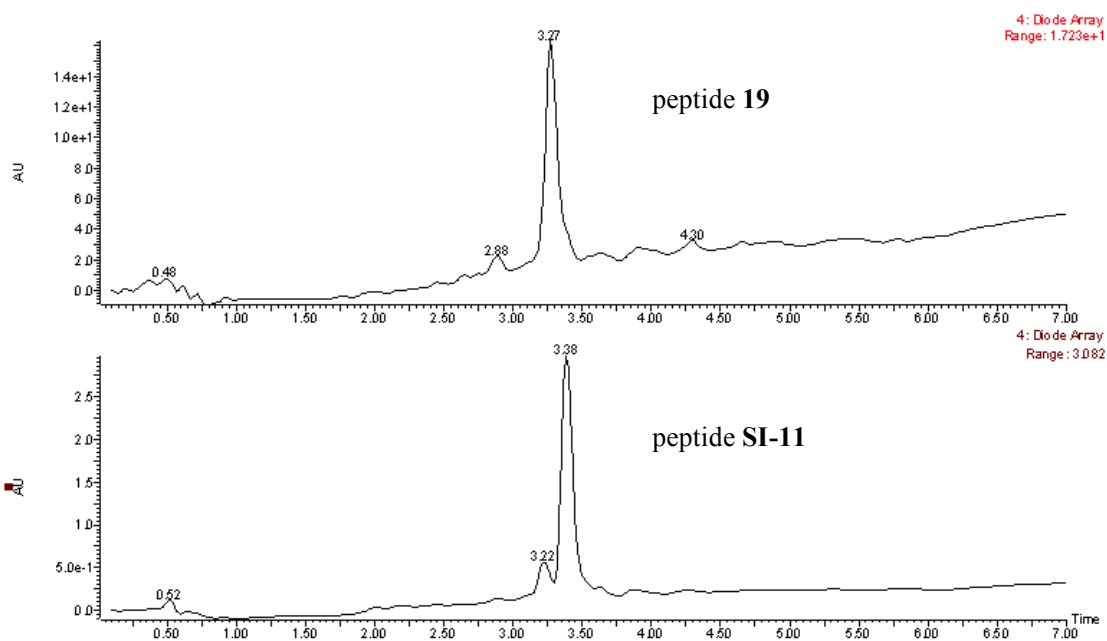

LC-MS mass spectra comparing peptide **19** to enriched peptide **SI-11**:

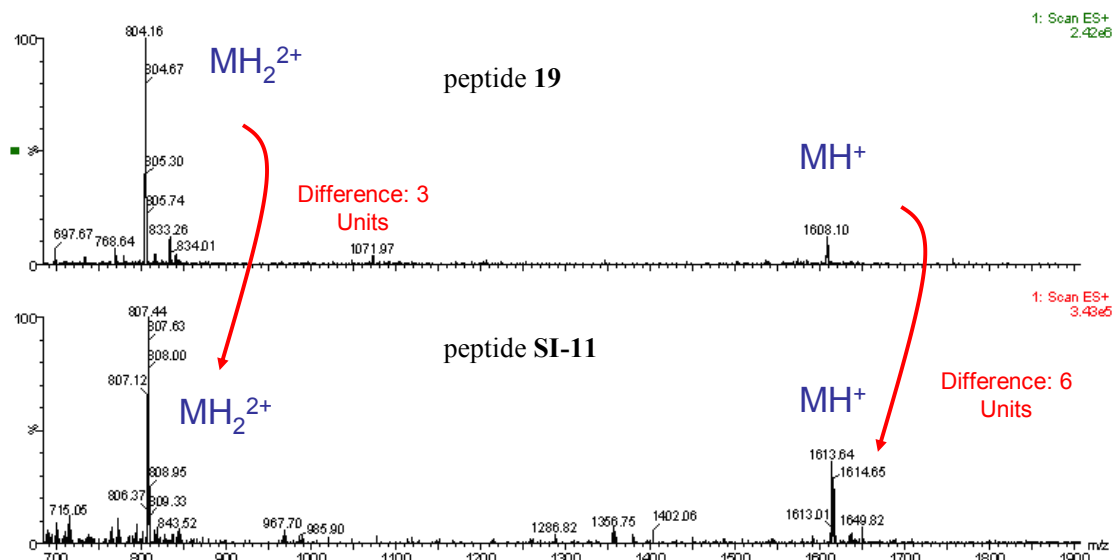

MALDI-TOF mass spectra comparing peptide **19** to enriched peptide **SI-11**:

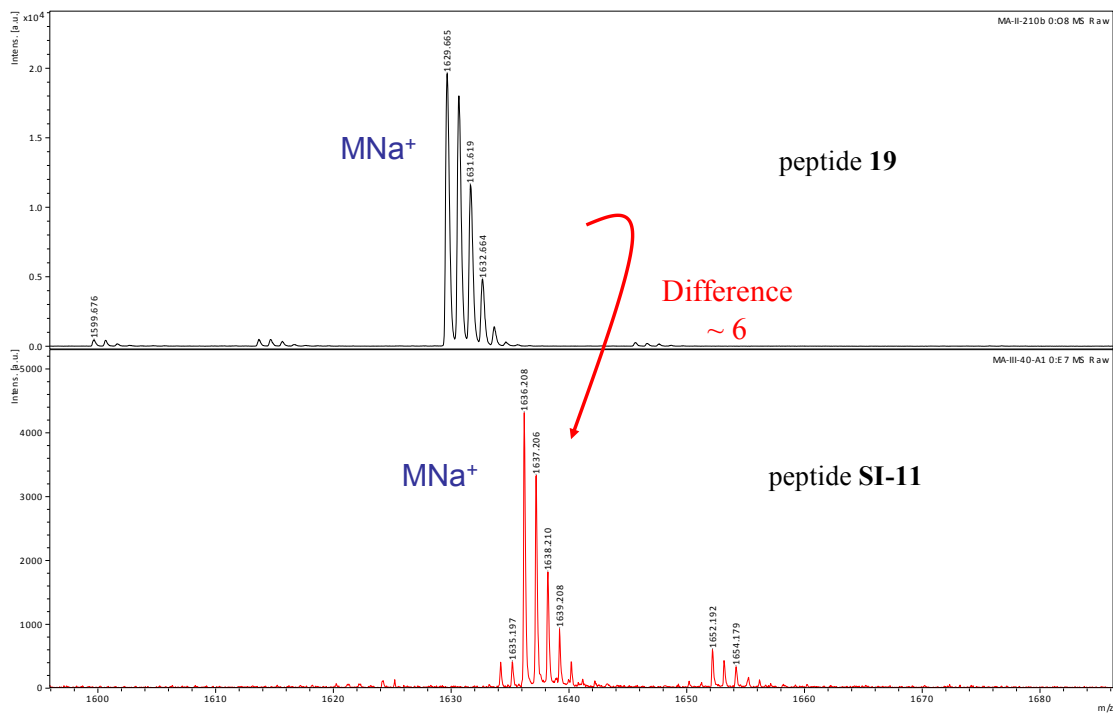

SI-11  
+  
20  
1) Oxyma, HBTU,  
DIPEA, DMF, rt, 8hrs  
2) TFA, rt, 24 hrs  
→  
26% over two steps

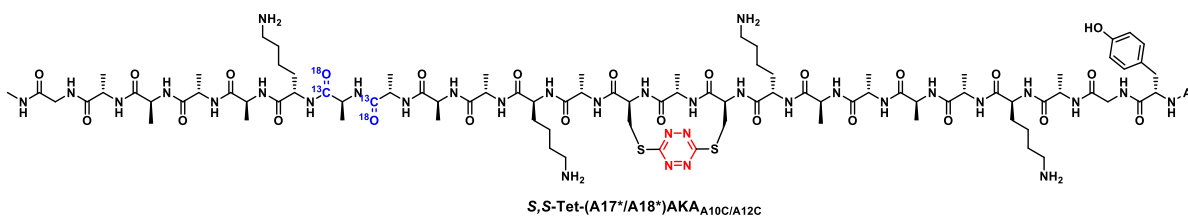

LC-MS chromatogram of peptide *S,S*-Tet-(A17\*/A18\*)AKA<sub>A10C/A12C</sub>:

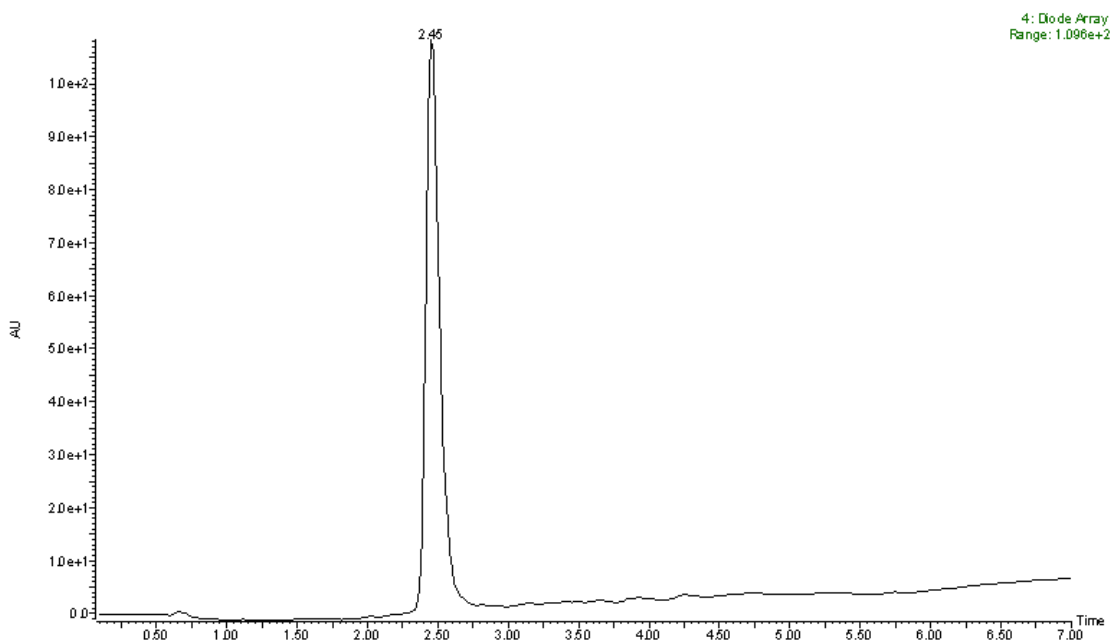

LC-MS mass spectrum of peptide *S,S*-Tet-(A17\*/A18\*)AKA<sub>A10C/A12C</sub>:

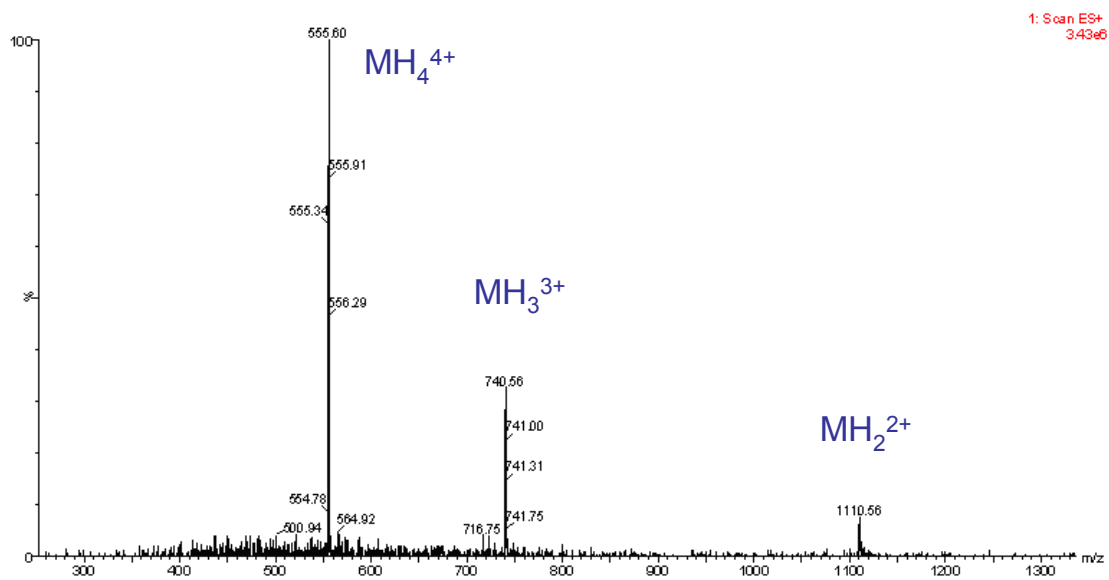

MALDI-TOF mass spectrum of peptide *S,S*-Tet-(A17\*/A18\*)AKA<sub>A10C/A12C</sub>:

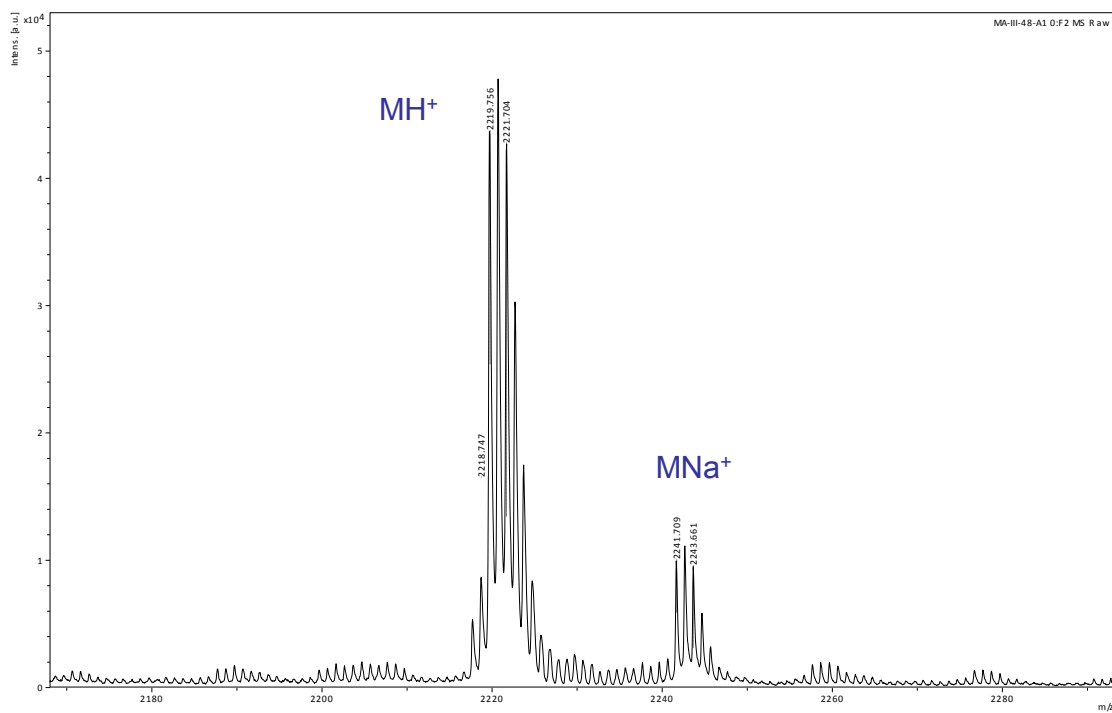



LC-MS chromatograms comparing peptide  $S,S$ -Tet- $AKA_{A10C/A12C}$  to enriched peptide  $S,S$ -Tet- $(A17^*/A18^*)AKA_{A10C/A12C}$ :

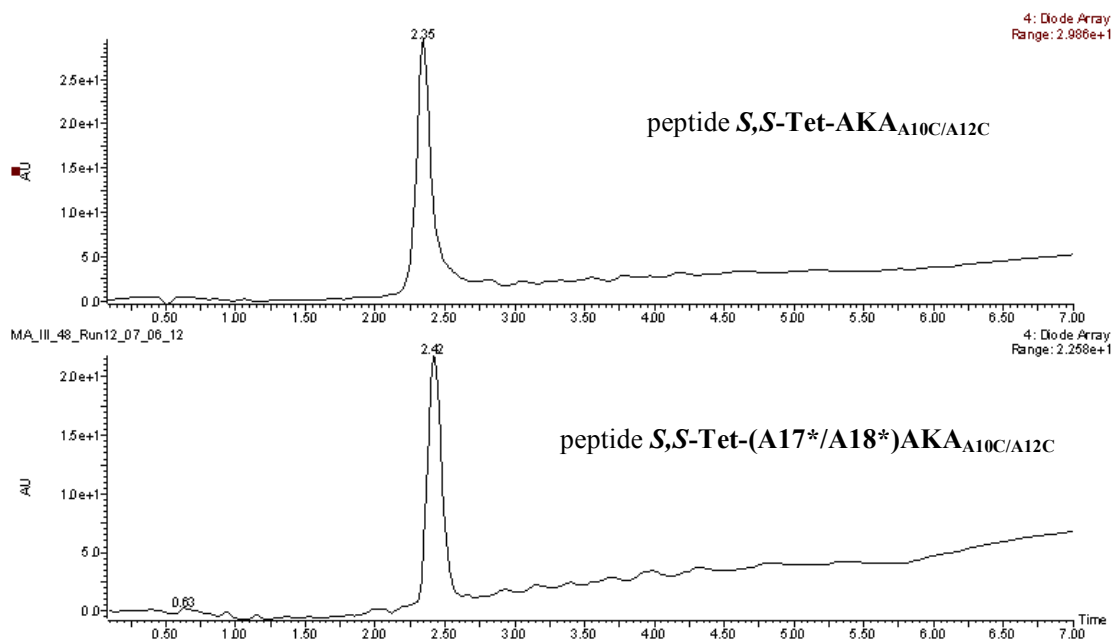

LC-MS mass spectra comparing peptide  $S,S$ -Tet- $AKA_{A10C/A12C}$  to enriched peptide  $S,S$ -Tet- $(A17^*/A18^*)AKA_{A10C/A12C}$ :

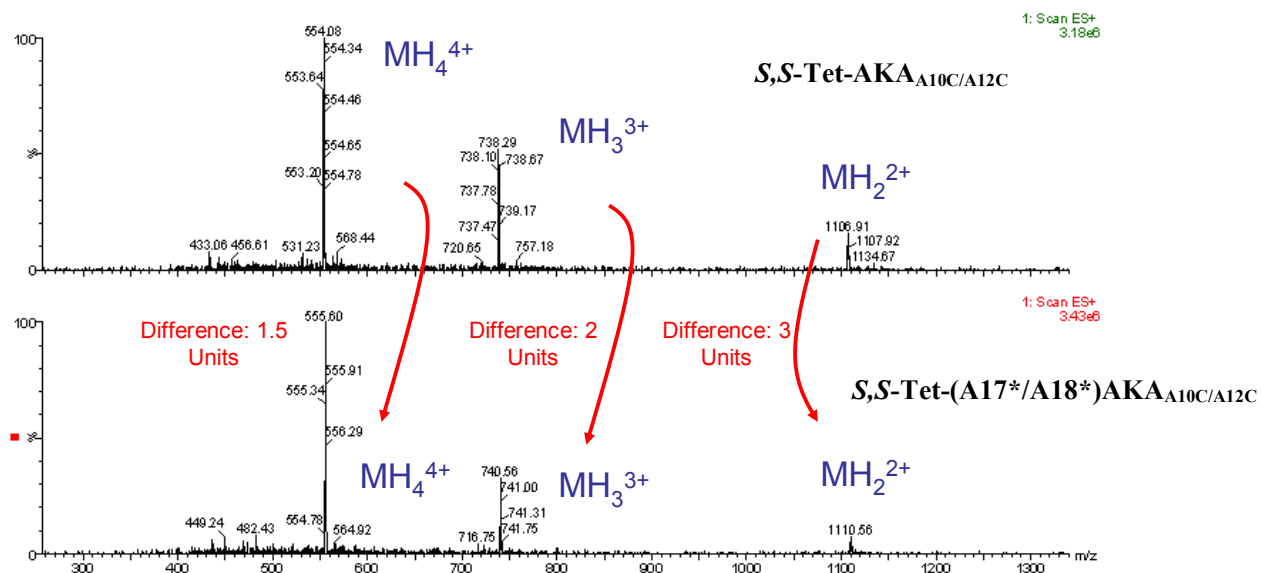

MALDI-TOF comparing peptide **S,S-Tet-AKA<sub>A10C/A12C</sub>** to enriched peptide **S,S-Tet-(A17\*/A18\*)AKA<sub>A10C/A12C</sub>**:

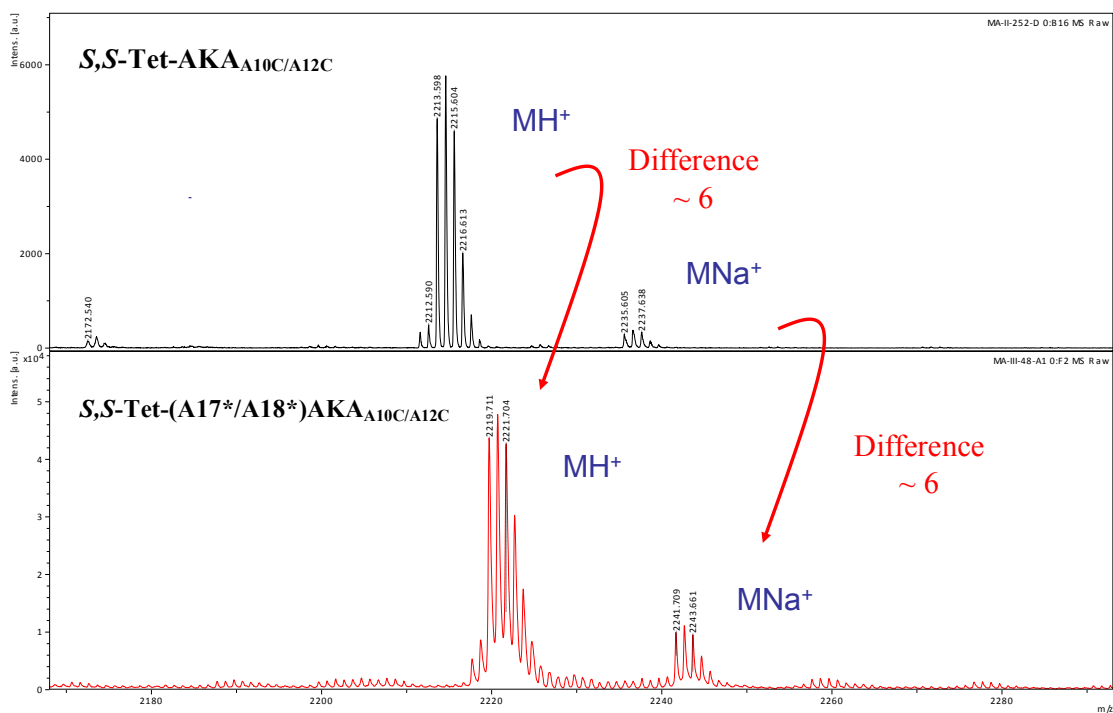

## S,S-Tetrazine Reduction and Re-Oxidation

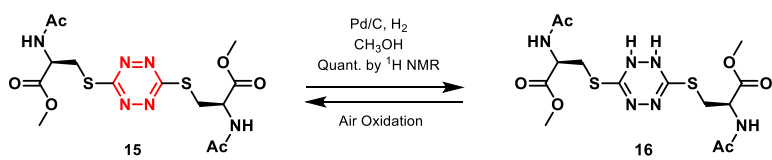

LC-MS chromatograms comparing compound **15** to compound **16**:

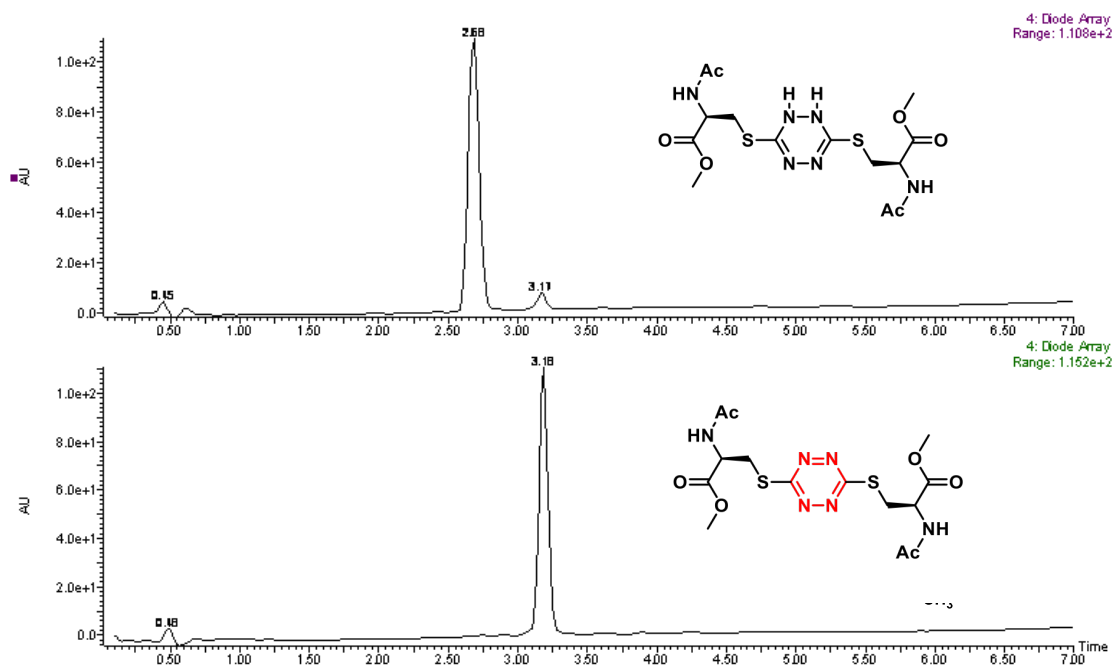

LC-MS mass spectra comparing compound **15** to compound **16**:

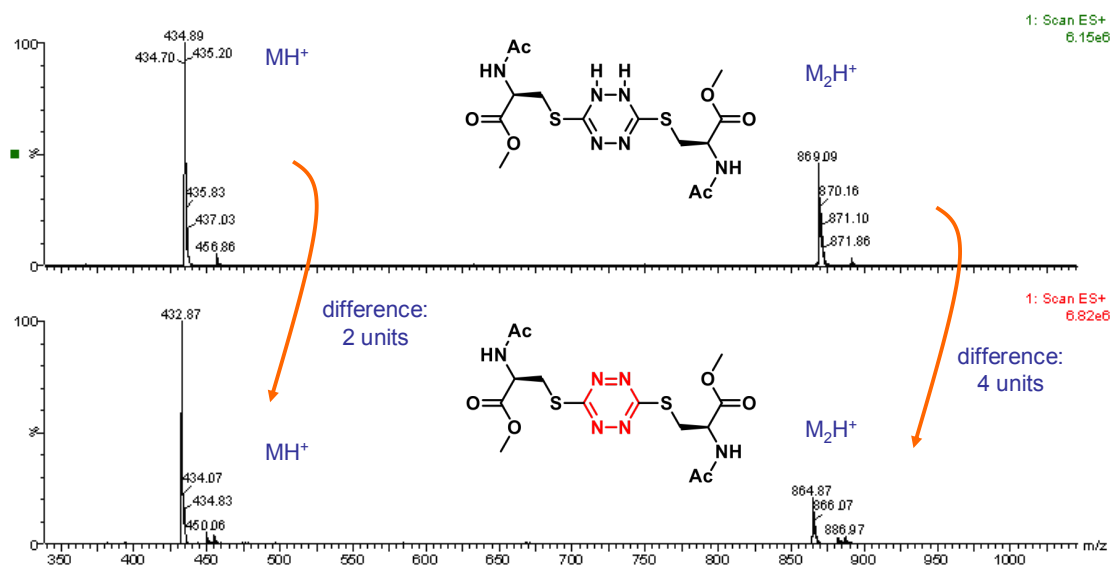

LC-MS chromatograms depicting air oxidation of compound **16** to compound **15**:

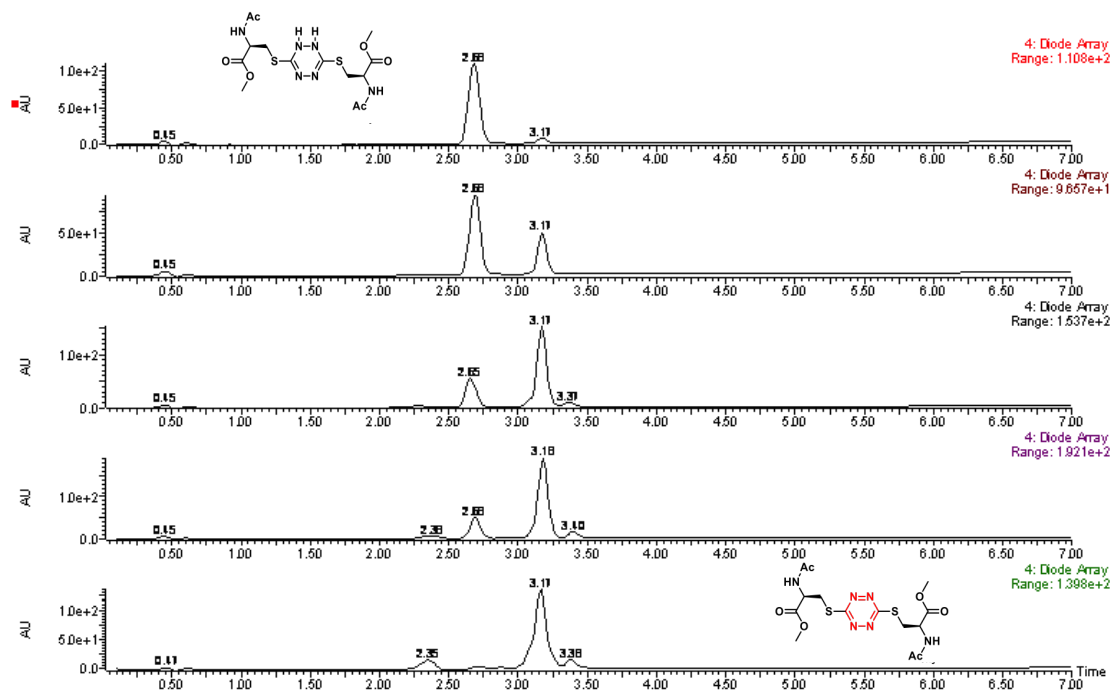

## Experimental Evidence for the 1,2-dihydro-*S,S*-tetrazine

Simulated structures of compound **16** as 1,2- vs 1,4-dihydropyridazine:

**Simulated Structure of  
1,2-dihydropyridazine**

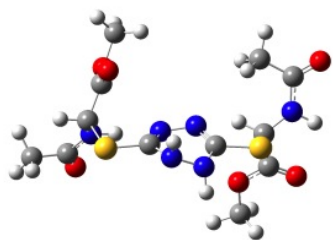

**Simulated Structure of  
1,4-dihydropyridazine**

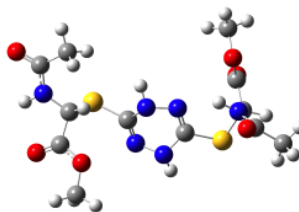

Based on the simulations performed, the ring mode frequencies for the 1,2- and 1,4-dihydropyridazine systems were calculated and their IR Spectrum generated. Although 1,4-dihydropyridazine is energetically more favorable by  $\sim 7$  kcal/mol, the ring mode frequencies from the experimental IR of **16** matched those of the 1,2-dihydropyridazine.

A diagram representing the ring modes for 1,2-dihydropyridazine:

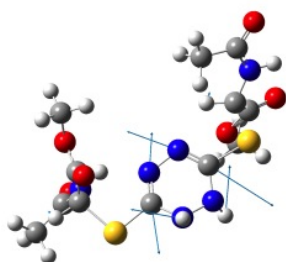

Ring mode 1: higher frequency

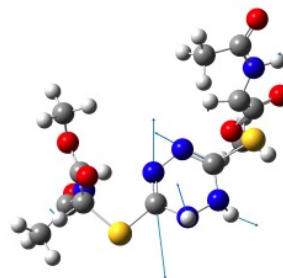

Ring mode 2: lower frequency

Calculated and experimental IR of compound 16:

Calculated IR Spectrum of  
1,2-dihydropyridazine

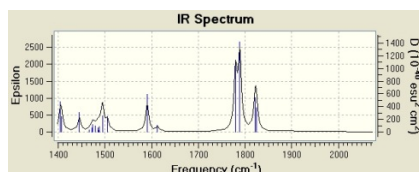

Calculated IR Spectrum of  
1,4-dihydropyridazine

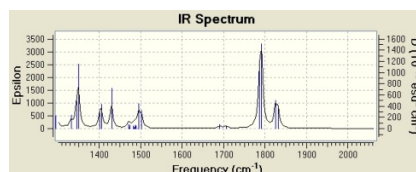

Collected IR Spectrum of 16

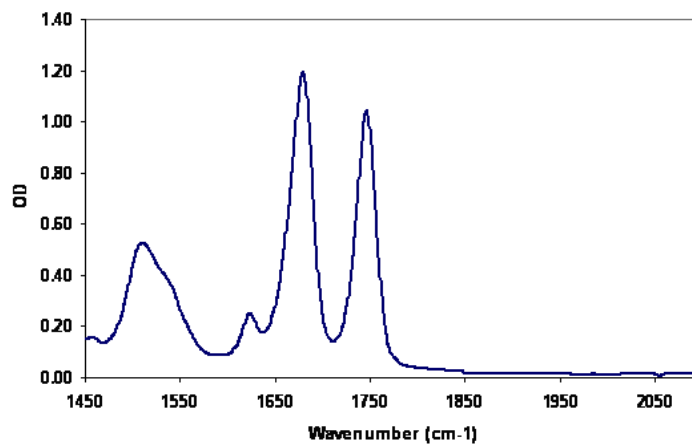

The ester and the acetate C=O frequency is used as a reference:

| Experiment                  | Calculated average          | RatioExperiment/Calculated |
|-----------------------------|-----------------------------|----------------------------|
| 1679 cm <sup>-1</sup> amide | 1789 cm <sup>-1</sup> amide | 0.938                      |
| 1745 cm <sup>-1</sup> ester | 1823 cm <sup>-1</sup> ester | 0.955                      |

Average of the ratio = 0.947

From 1,2 - dihydrotetrazine calculation :

$$1590 \text{ cm}^{-1} \times 0.947 = 1506 \text{ cm}^{-1}$$

$$1691 \text{ cm}^{-1} \times 0.947 = 1601 \text{ cm}^{-1}$$

$$1612 \text{ cm}^{-1} \times 0.947 = 1527 \text{ cm}^{-1}$$

$$1701 \text{ cm}^{-1} \times 0.947 = 1610 \text{ cm}^{-1}$$

From 1,4 - dihydrotetrazine calculation :

$$1691 \text{ cm}^{-1} \times 0.947 = 1601 \text{ cm}^{-1}$$

$$1701 \text{ cm}^{-1} \times 0.947 = 1610 \text{ cm}^{-1}$$

From Experiment:

$$1510 \text{ cm}^{-1}$$

$$1536 \text{ cm}^{-1}$$

The ring mode frequencies from the experimental IR match those of the calculated frequencies of the 1,2 – dihydrotetrazine. Furthermore, the correlation in the peak shape was the same; higher ring mode frequency was less intense.

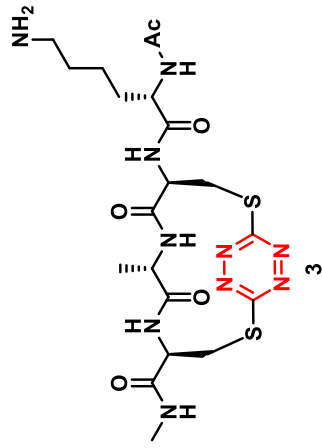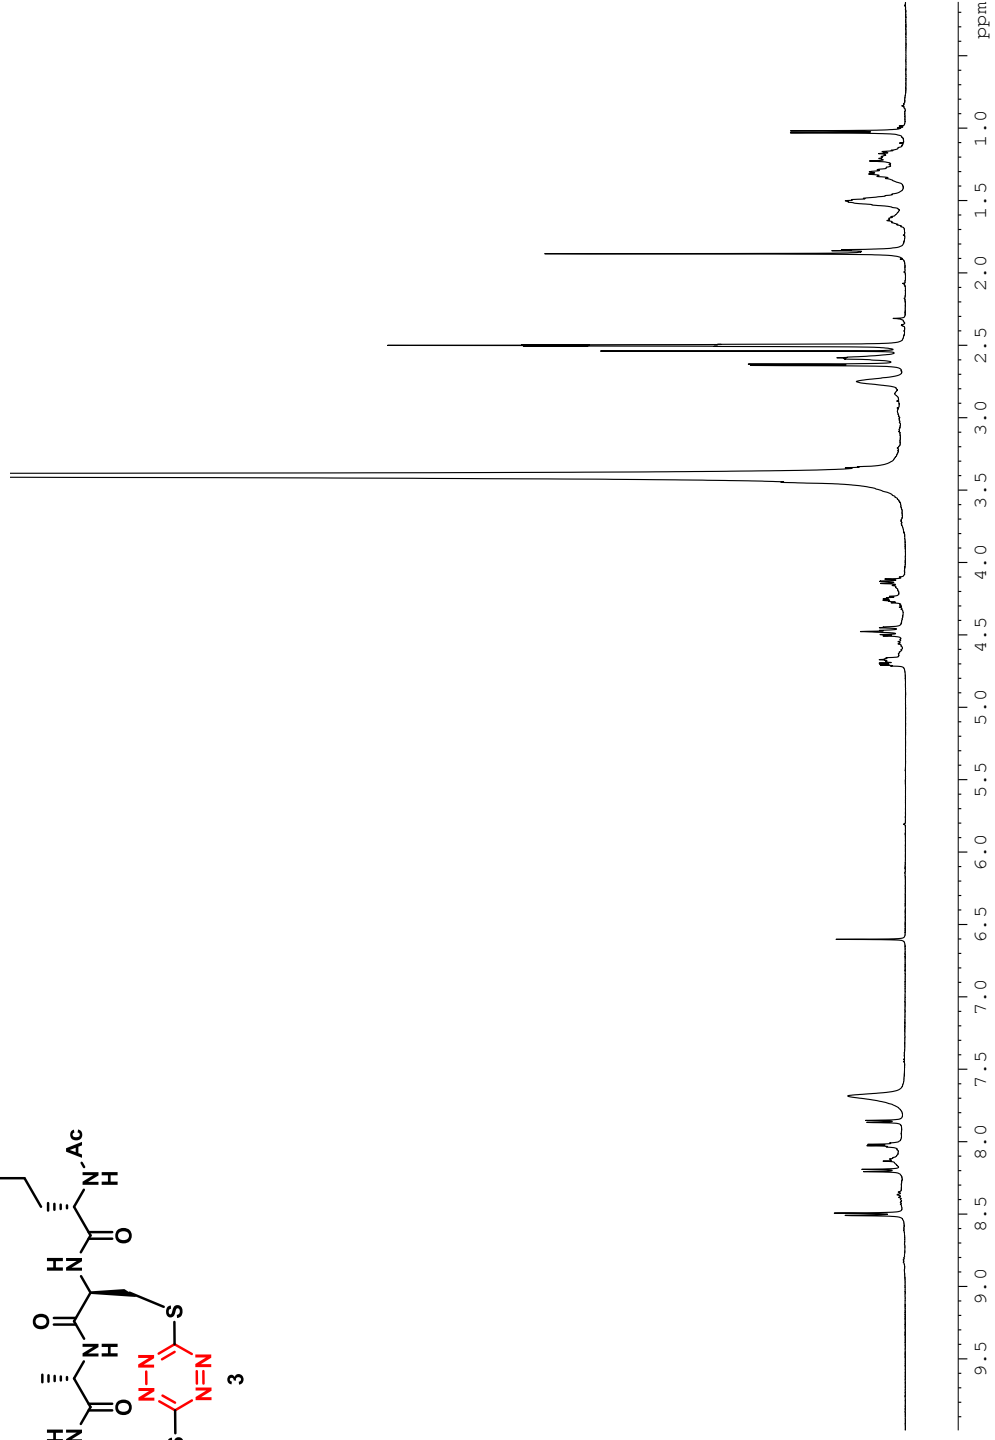

**3** (<sup>1</sup>H NMR, DMSO-*d*<sub>6</sub>, 500 MHz)



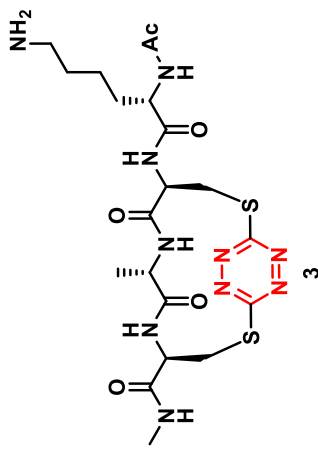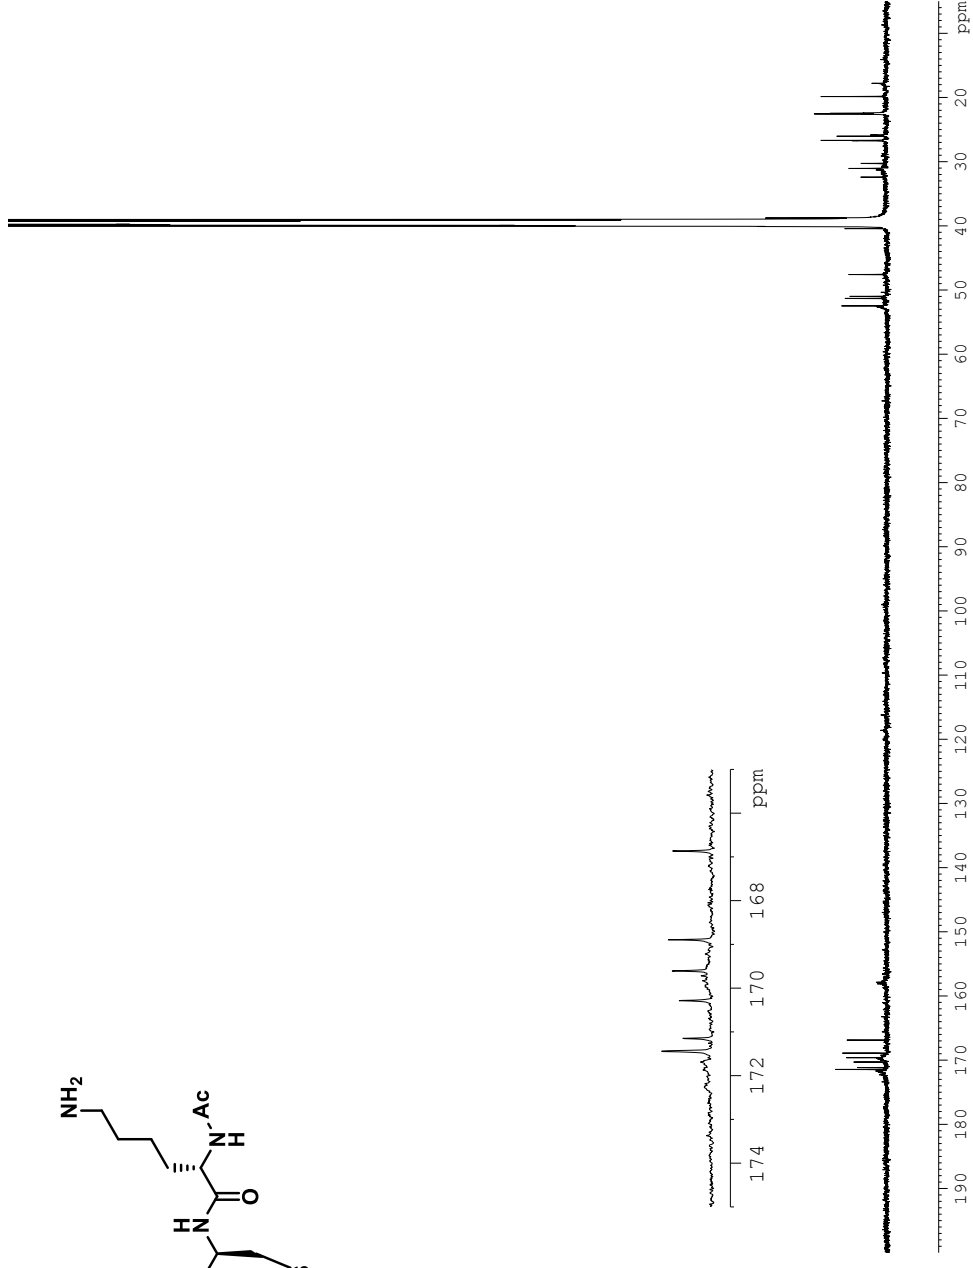

**3** (<sup>13</sup>C NMR, DMSO-*d*<sub>6</sub>, 125 MHz)

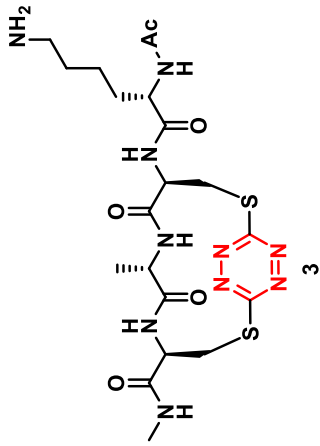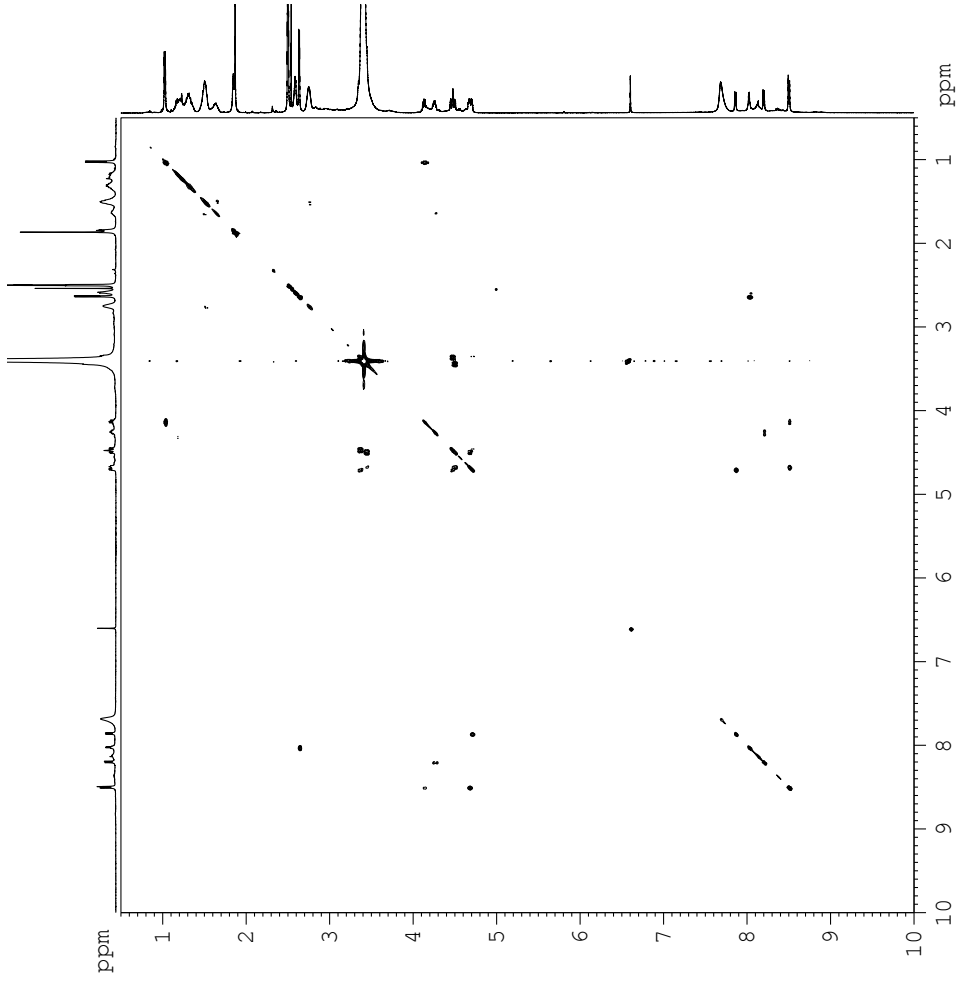

**3** (COSY, DMSO-*d*<sub>6</sub>)

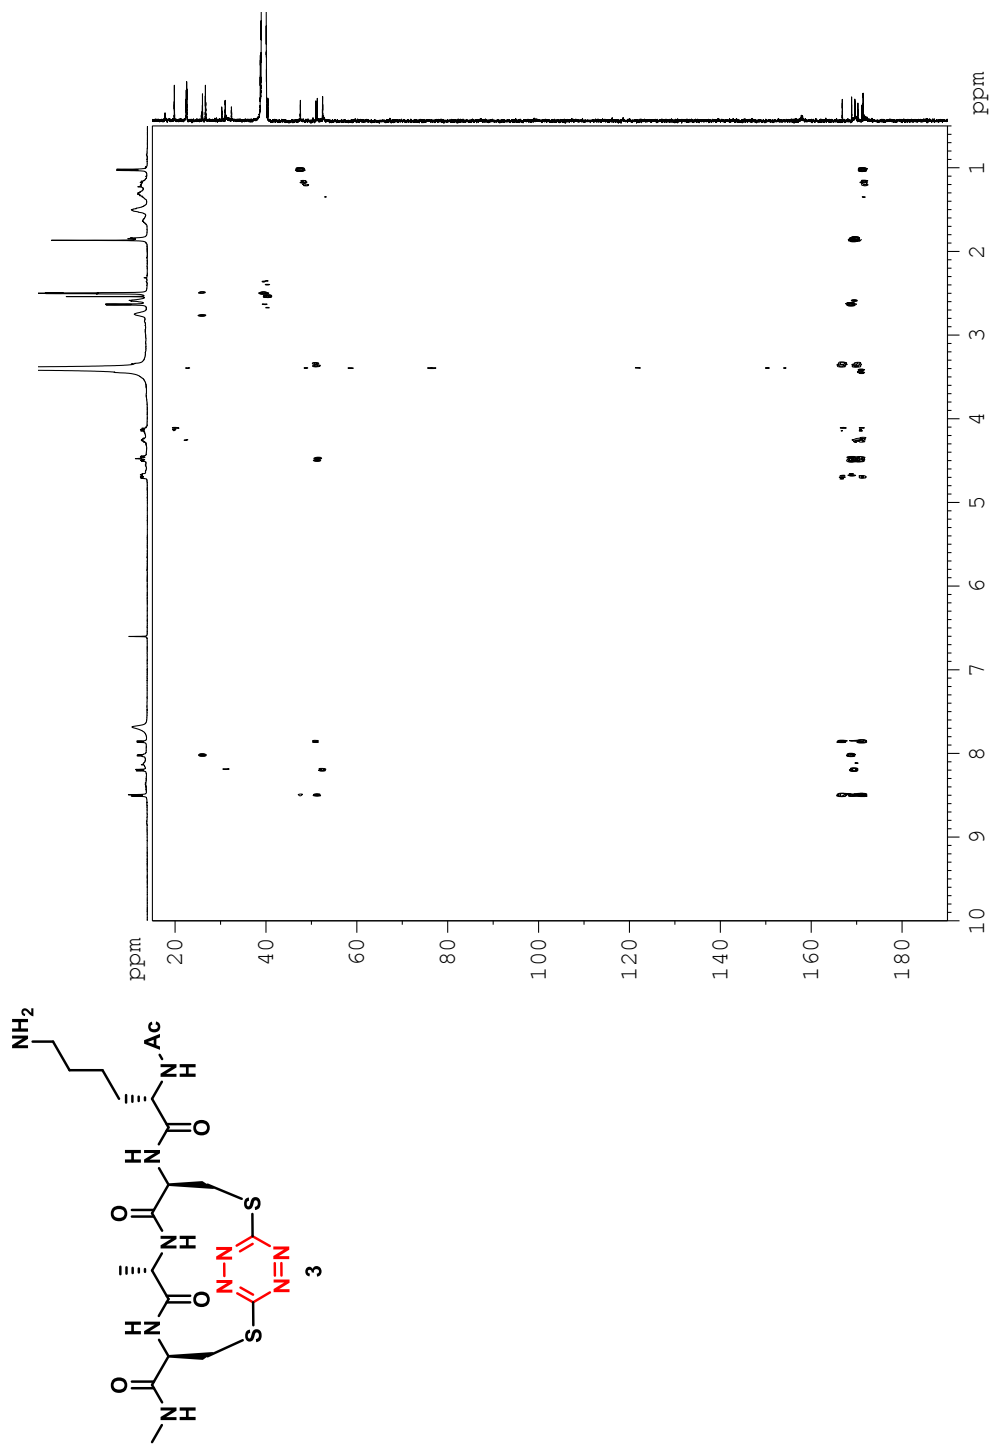

**3** (HMBC, DMSO-*d*<sub>6</sub>)

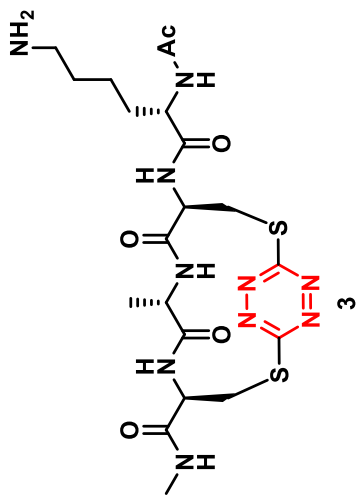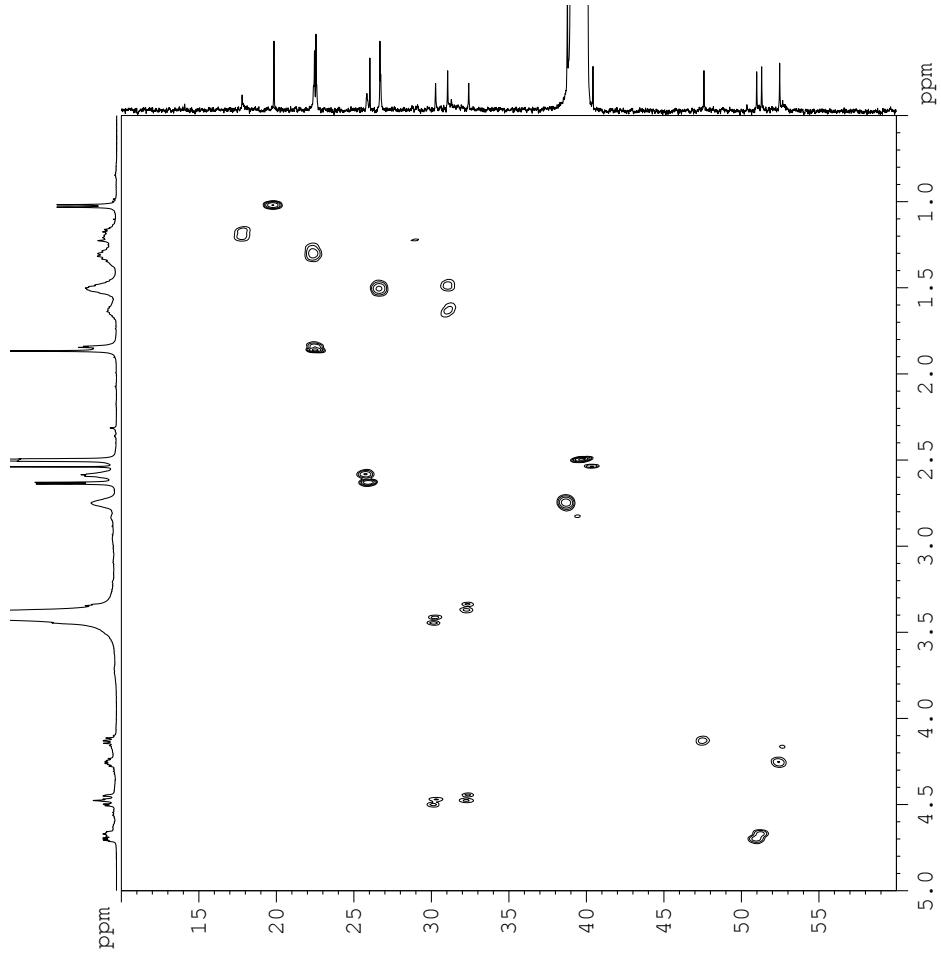

**3** (HSQC, DMSO- $d_6$ )

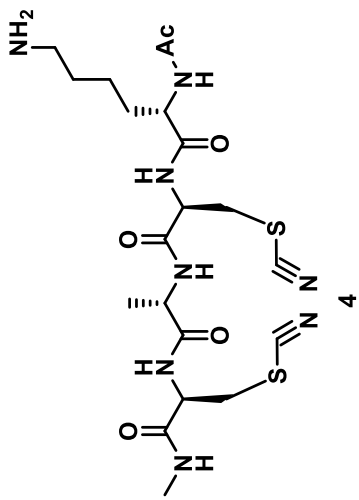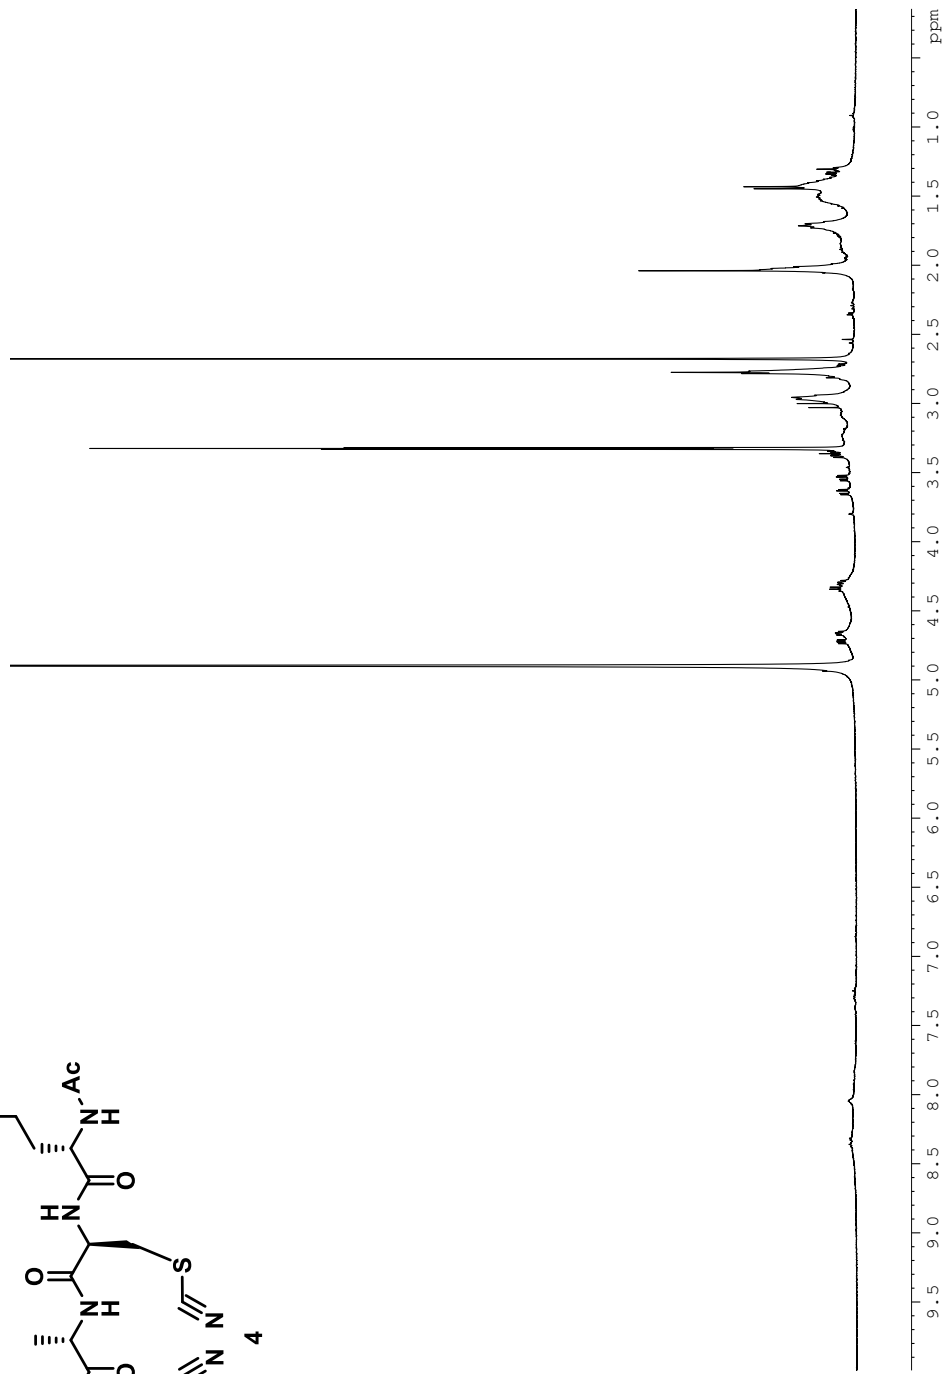

4 (<sup>1</sup>H NMR, CD<sub>3</sub>OD, 500 MHz)

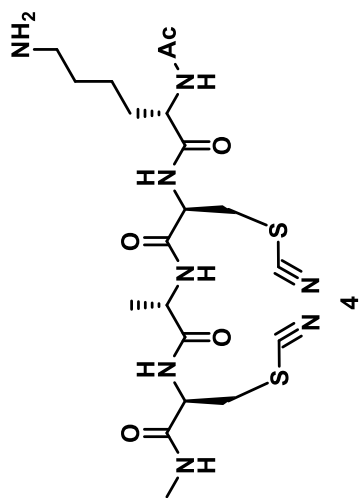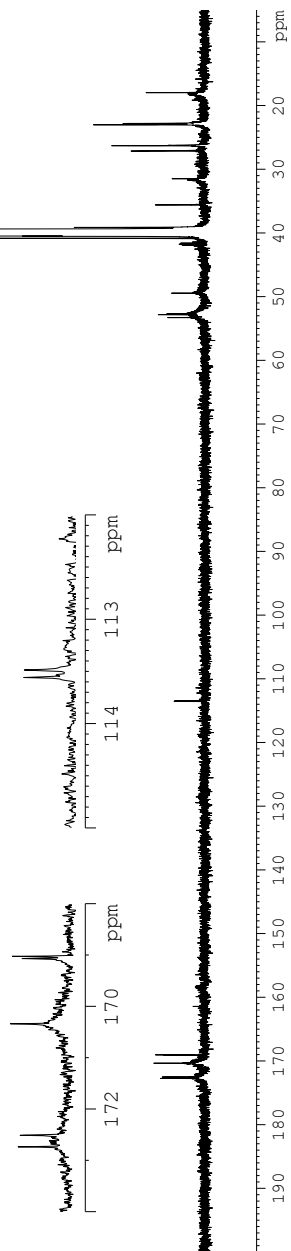

**4** (<sup>13</sup>C NMR, DMSO-*d*<sub>6</sub>, 125 MHz)

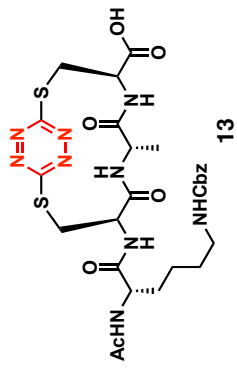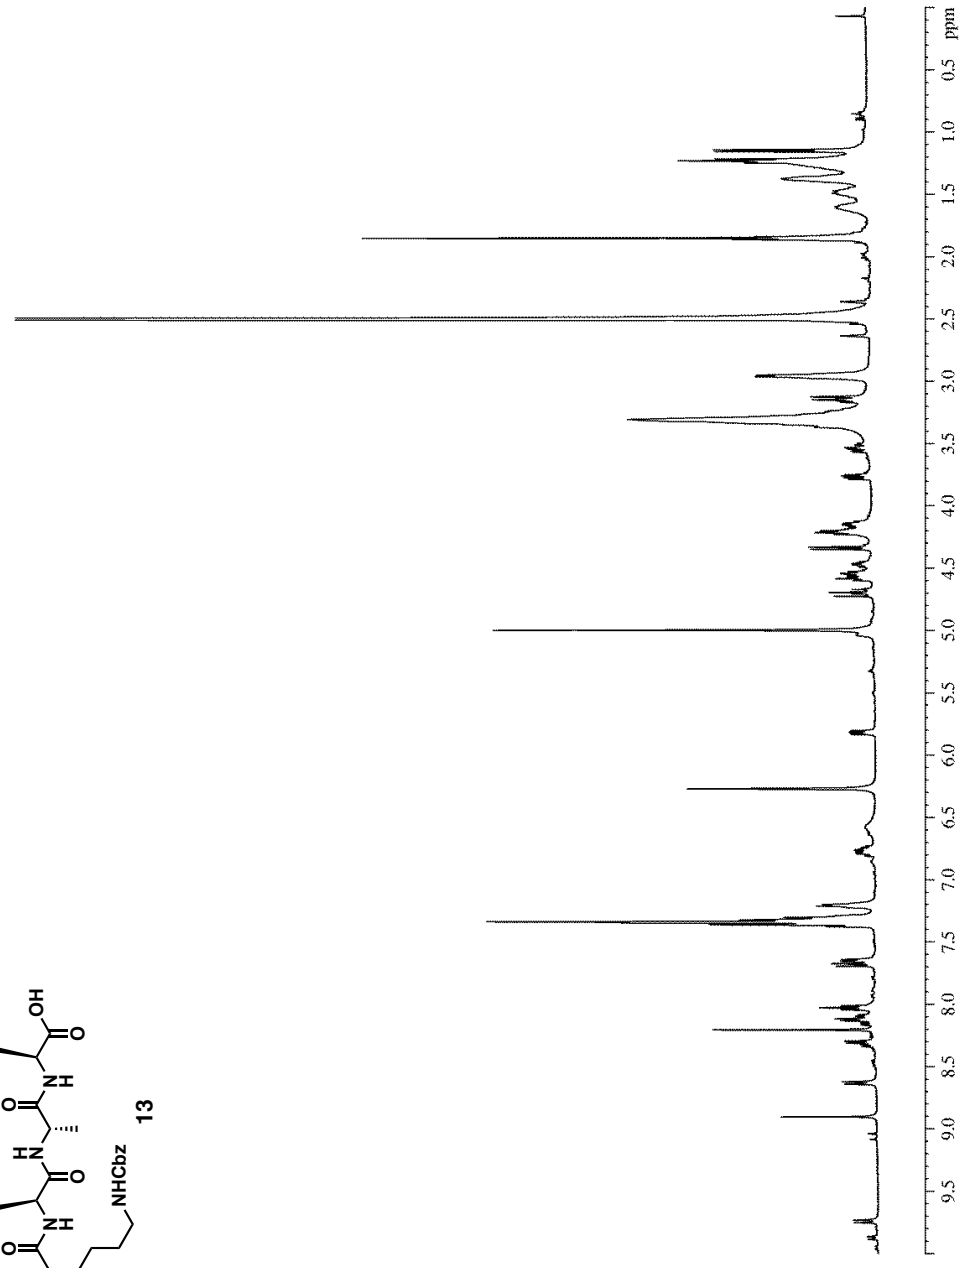

13 (<sup>1</sup>H NMR, DMSO-*d*<sub>6</sub>, 500 MHz)

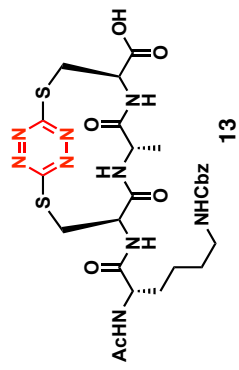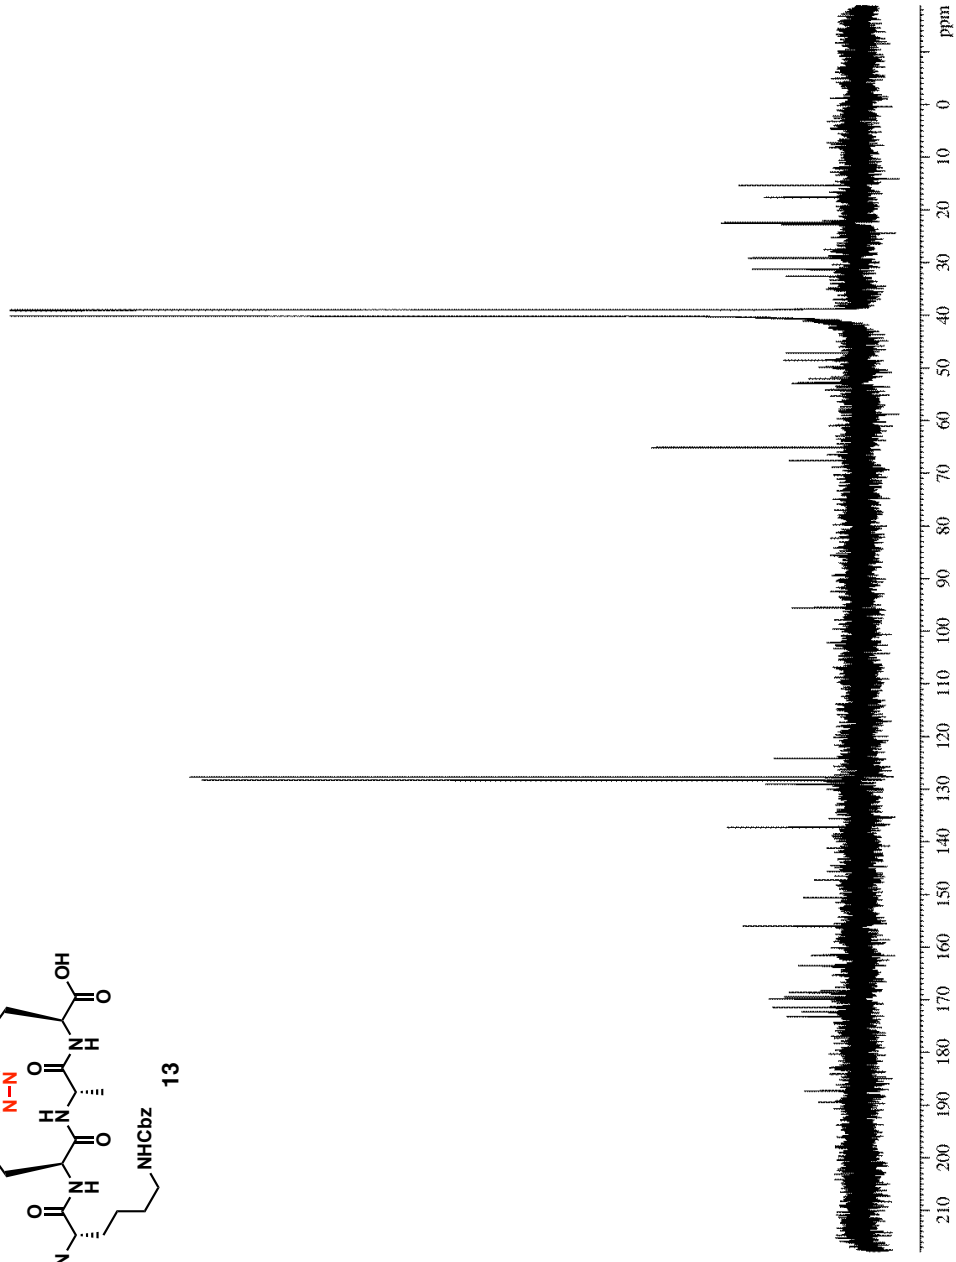

**13** ( $^{13}\text{C}$  NMR,  $\text{DMSO-}d_6$ , 125 MHz)



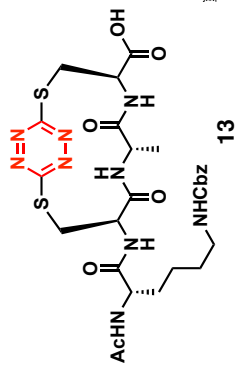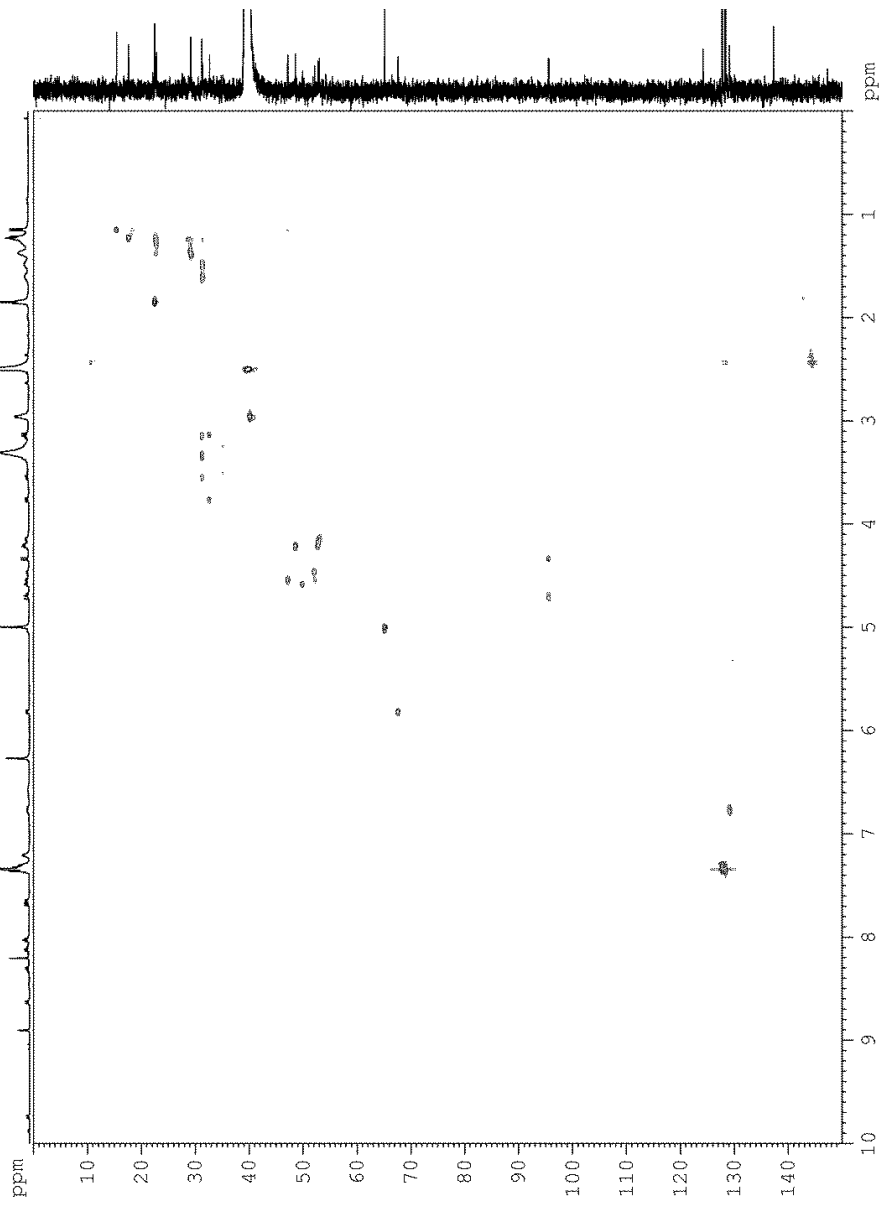

**13** (HSQC, DMSO-*d*<sub>6</sub>)

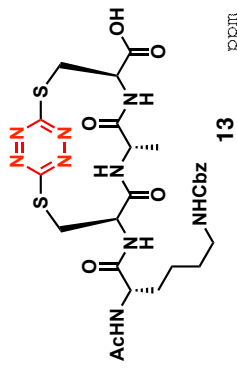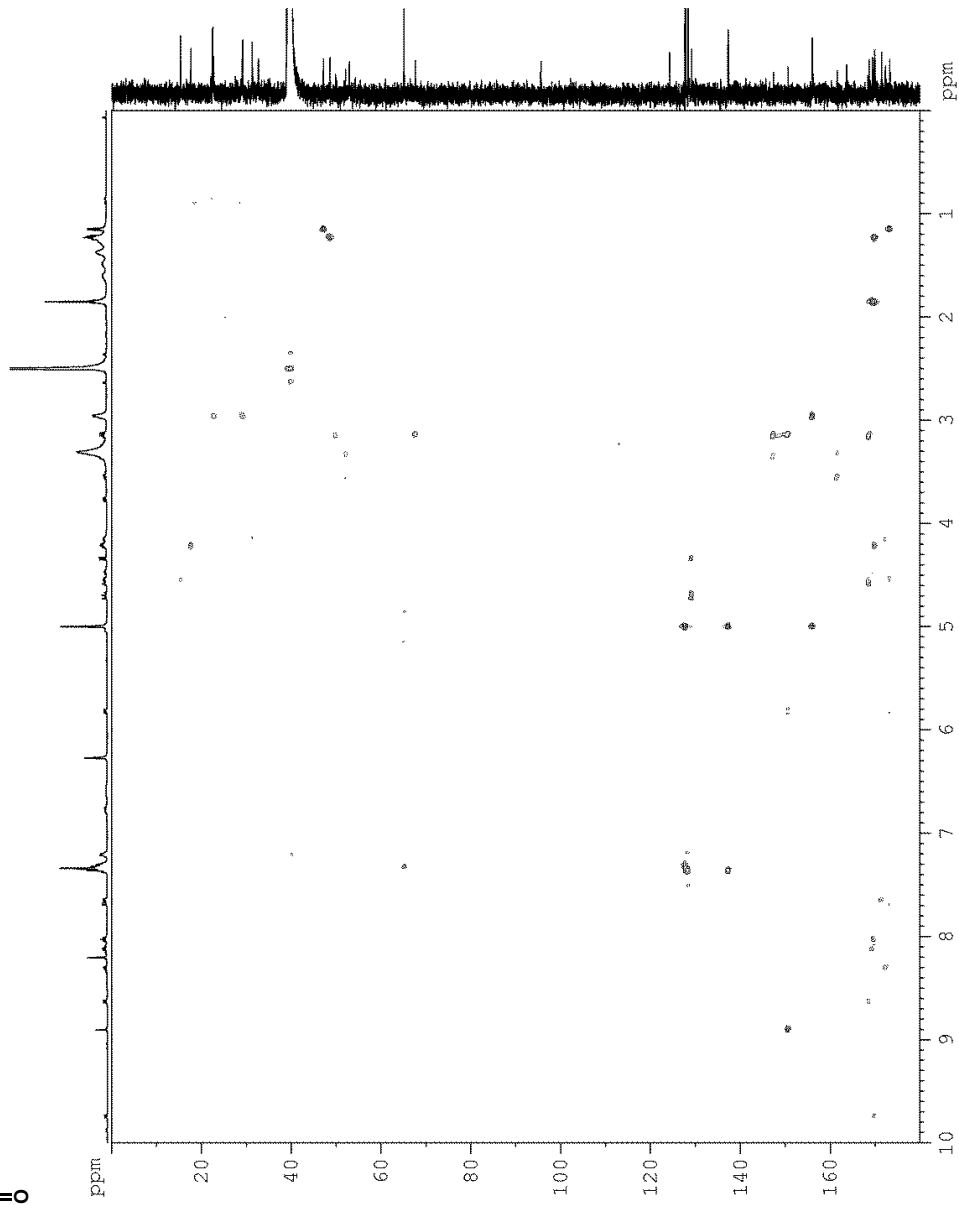

**13** (HMBC, DMSO- $d_6$ )

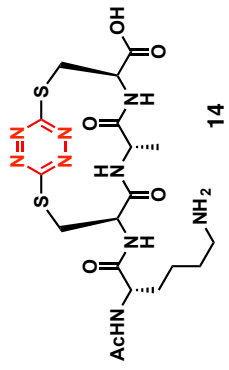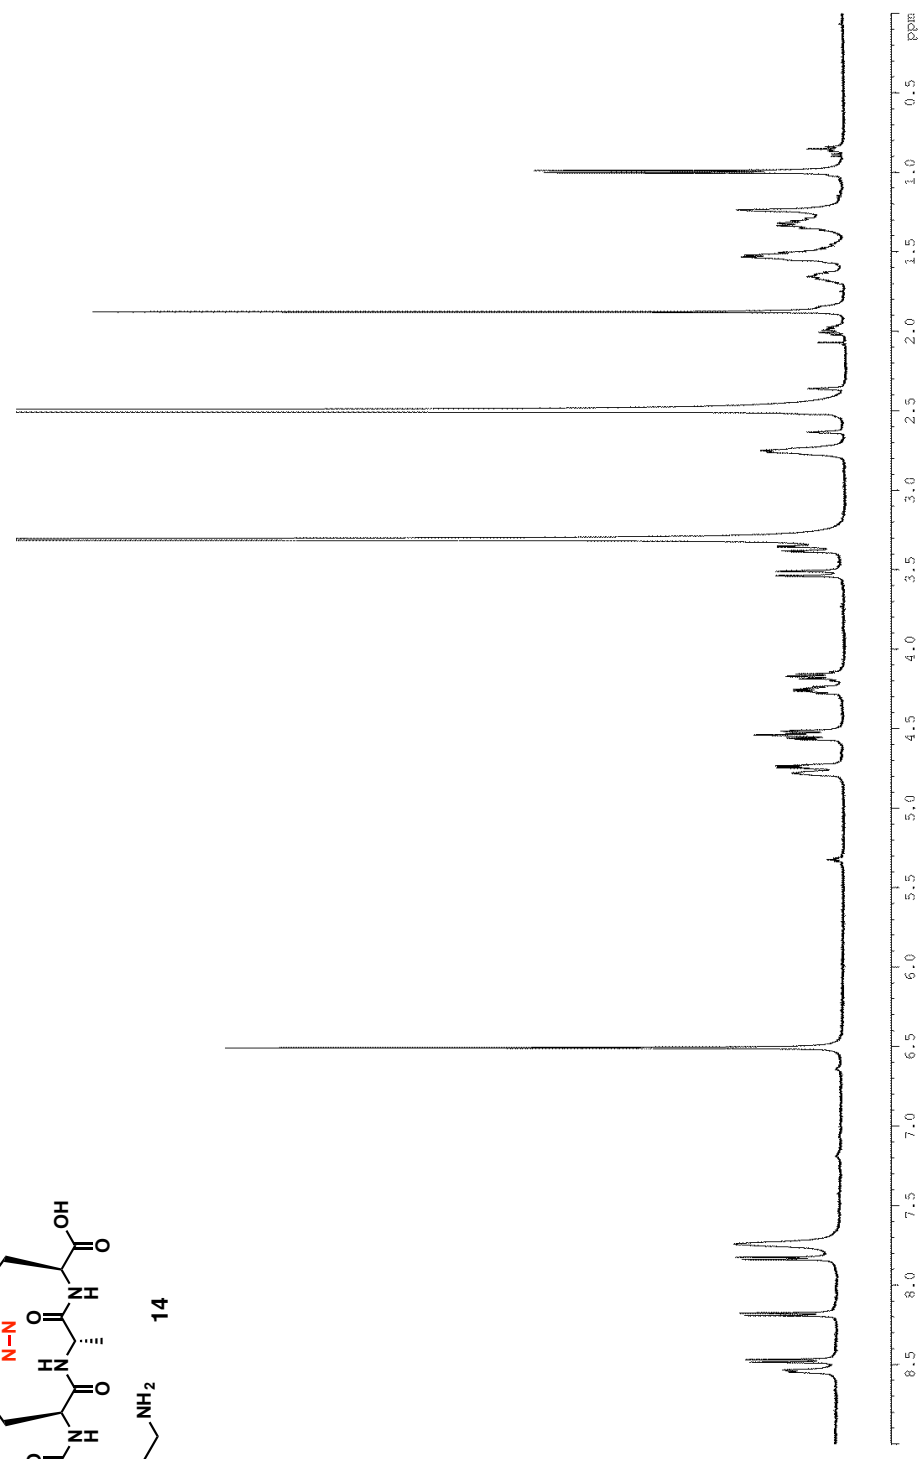

14 (<sup>1</sup>H NMR, DMSO-*d*<sub>6</sub>, 500 MHz)

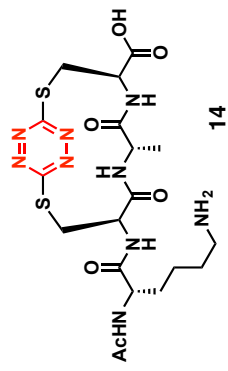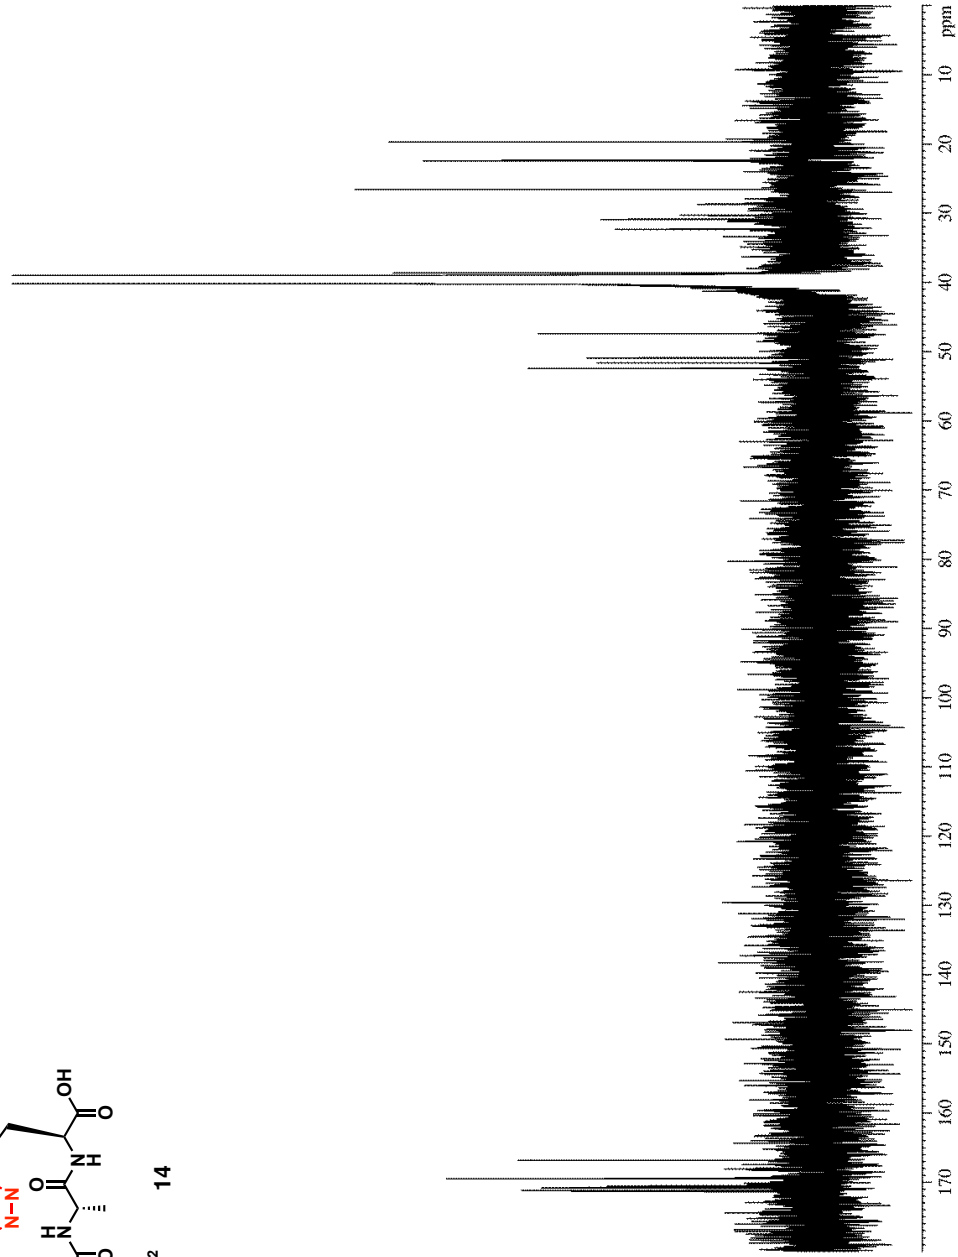

14 ( $^{13}\text{C}$  NMR,  $\text{DMSO-}d_6$ , 125 MHz)

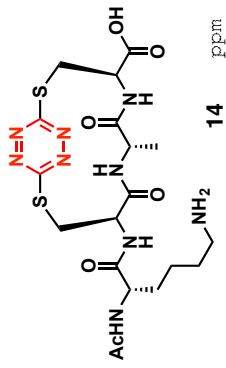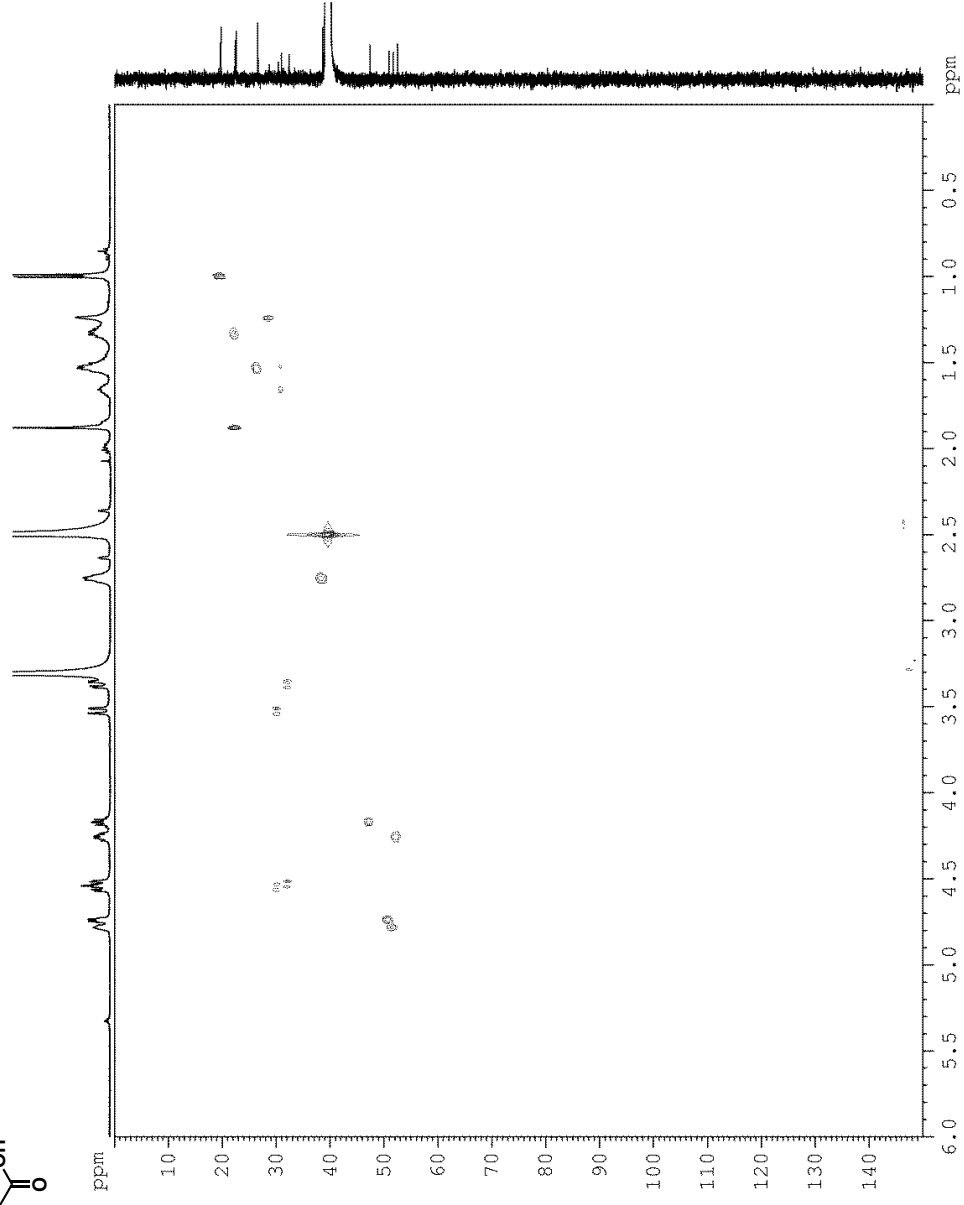

14 (HSQC, DMSO- $d_6$ )

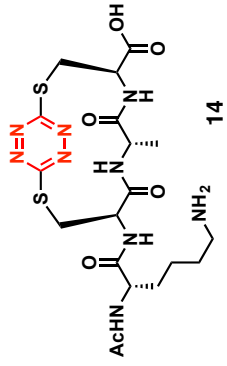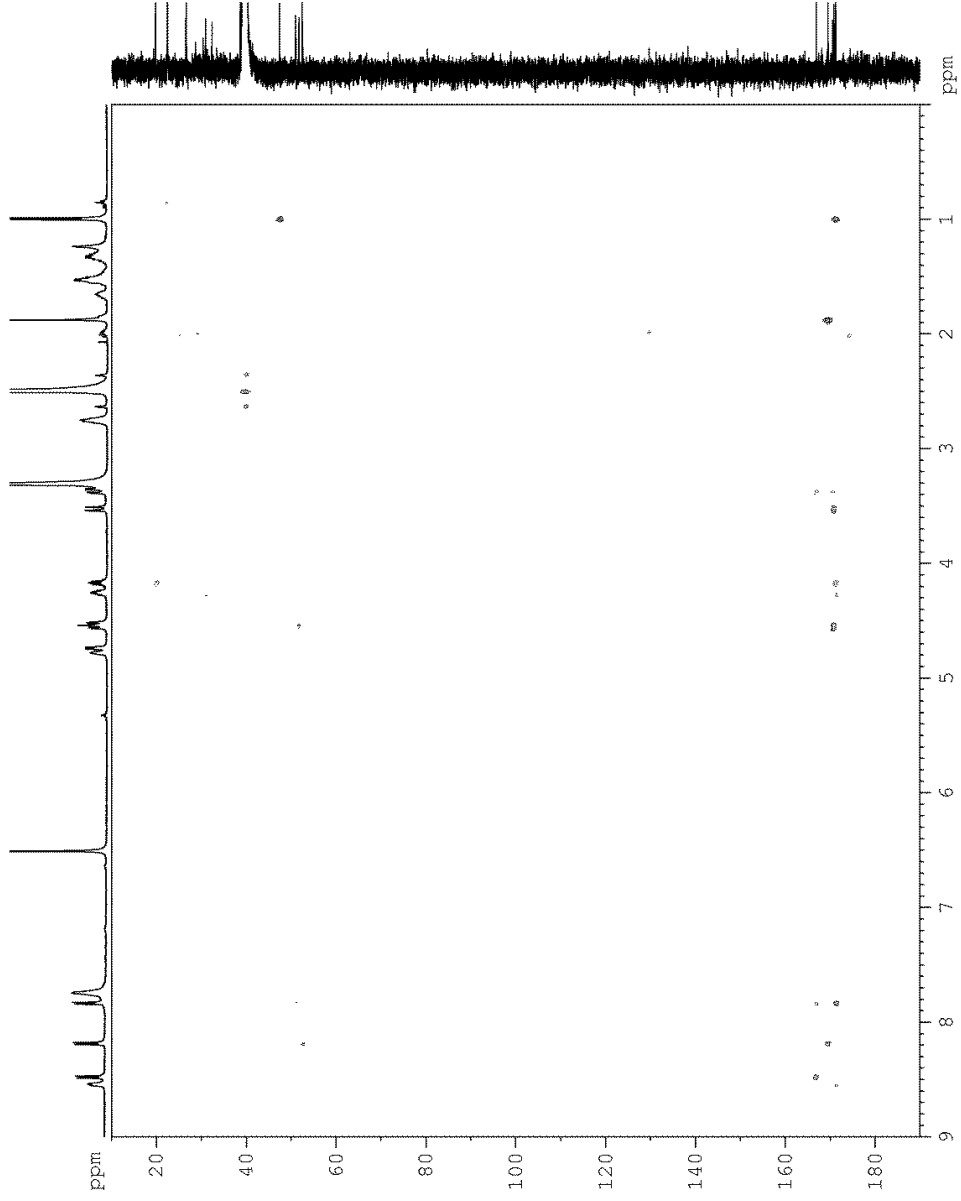

**14** (HMBC, DMSO-*d*<sub>6</sub>)

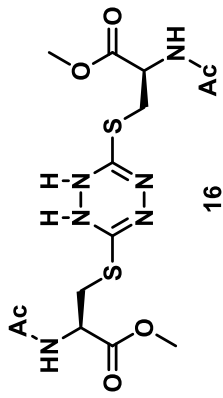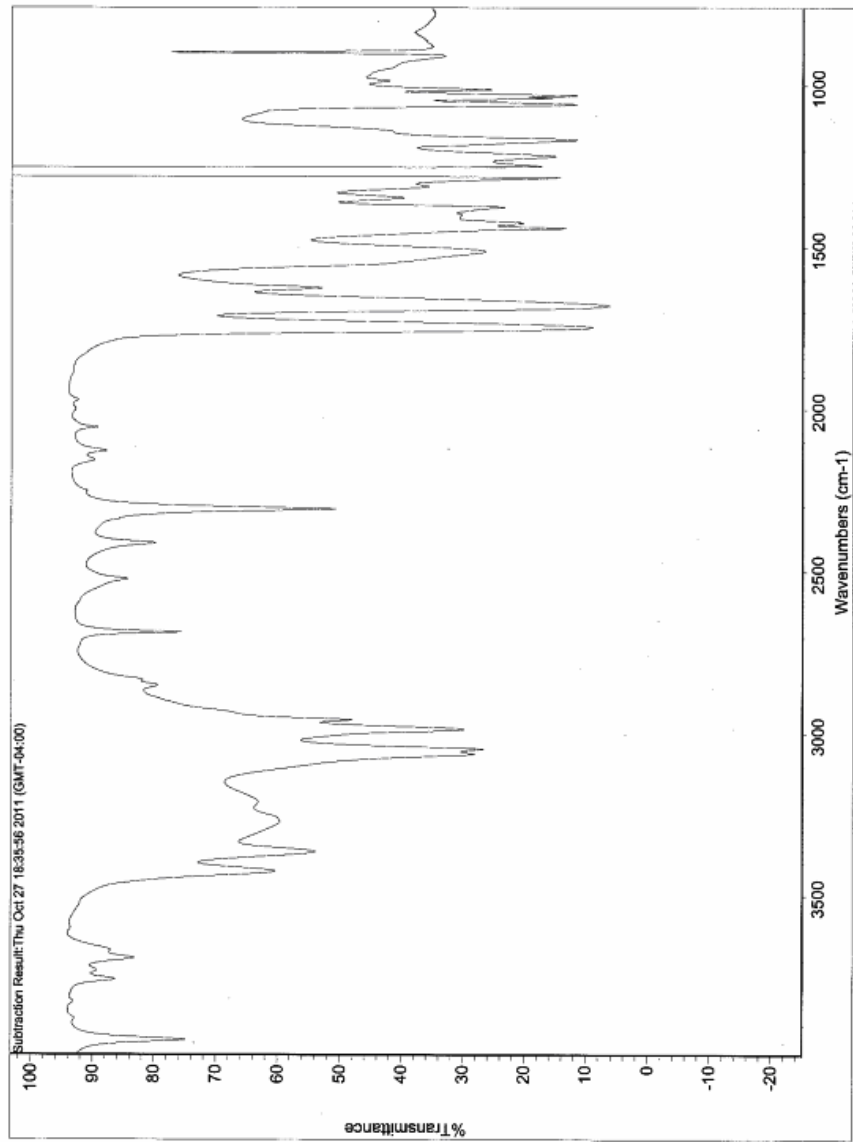

16 (IR, CH<sub>2</sub>Cl<sub>2</sub>)

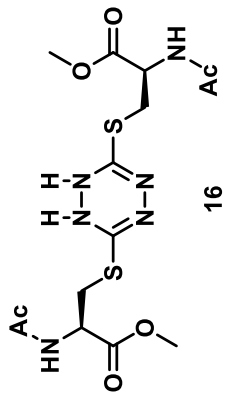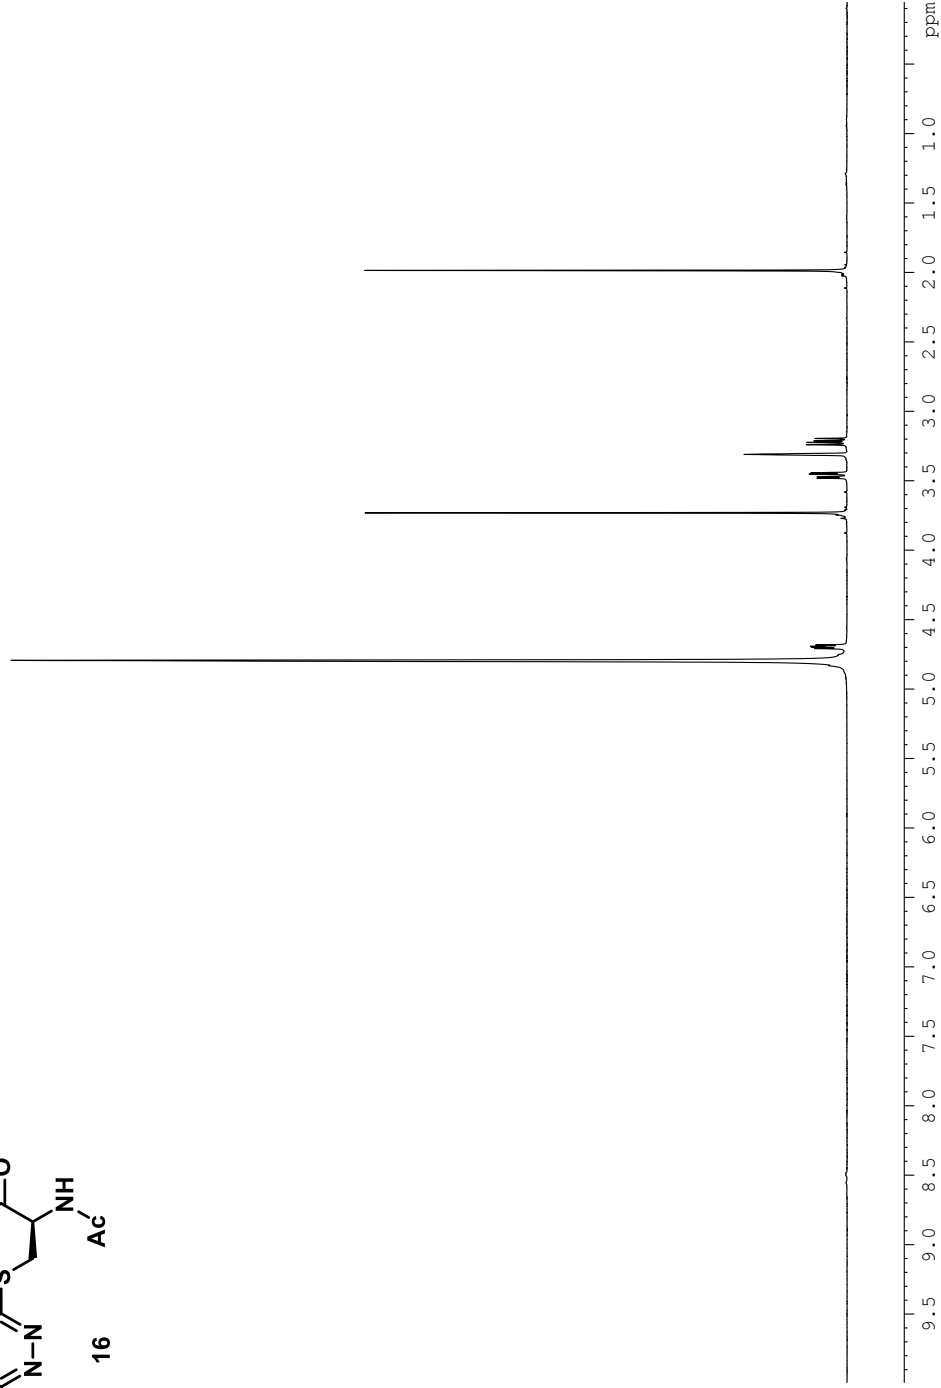

16 (<sup>1</sup>H NMR, CD<sub>3</sub>OD, 500 MHz)



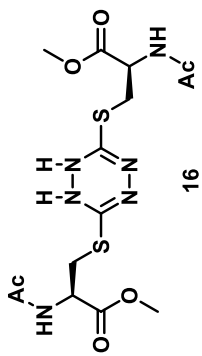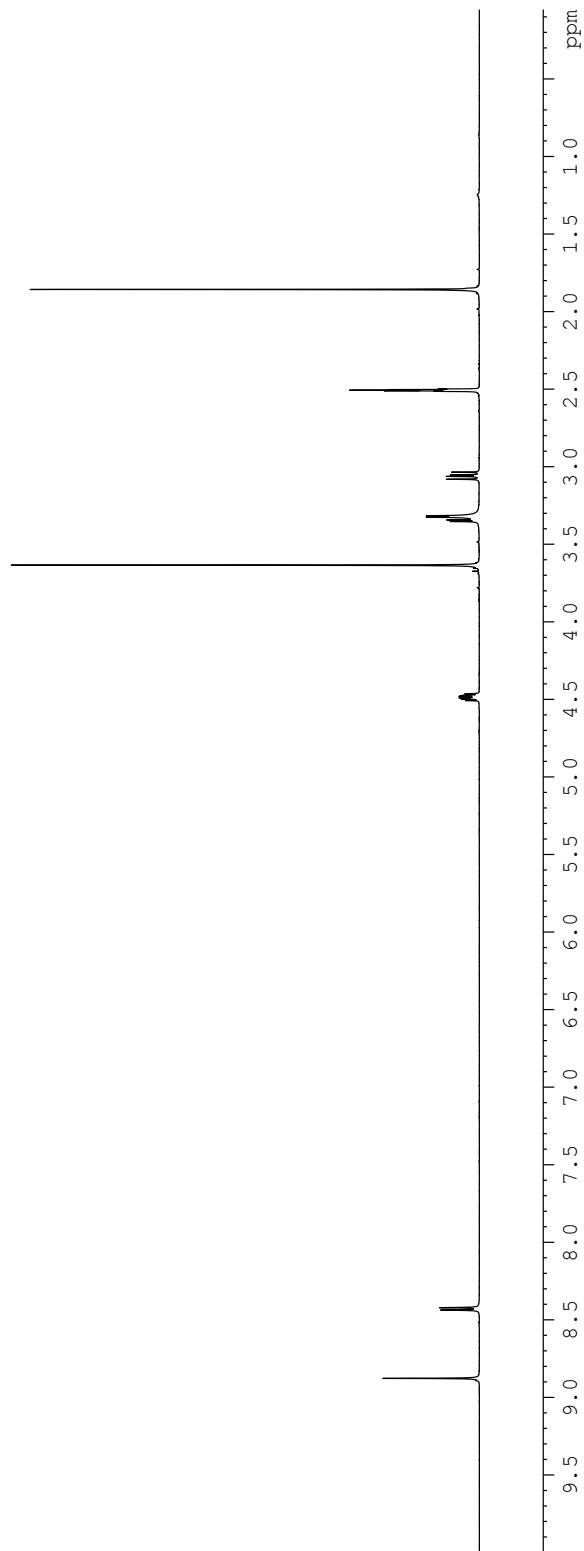

**16** ( $^1\text{H}$  NMR,  $\text{DMSO-}d_6$ , 500 MHz)

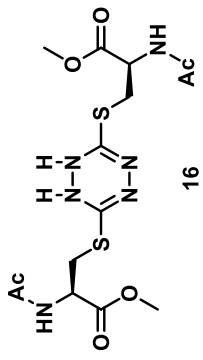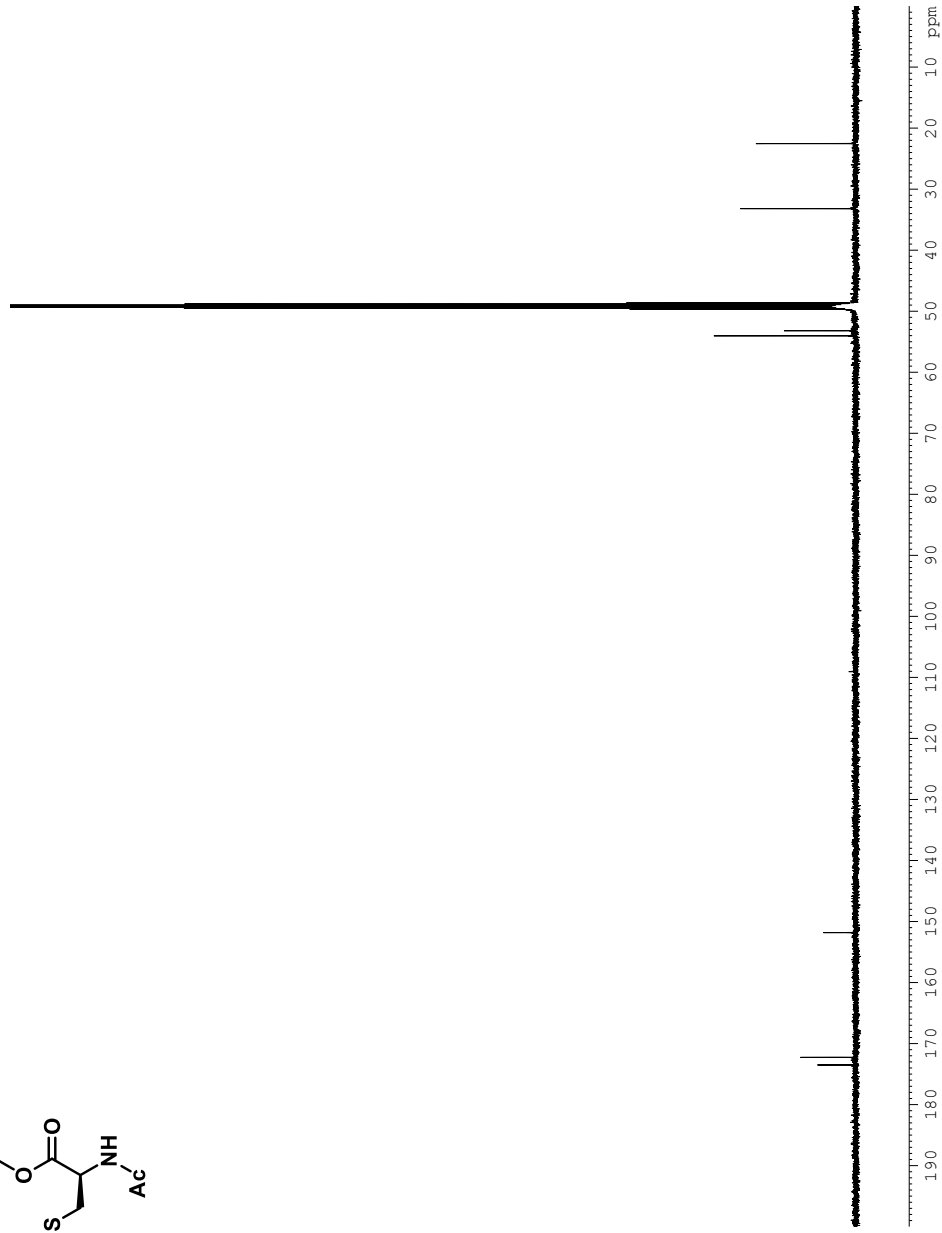

**16** ( $^{13}\text{C}$  NMR,  $\text{CD}_3\text{OD}$ , 125 MHz)

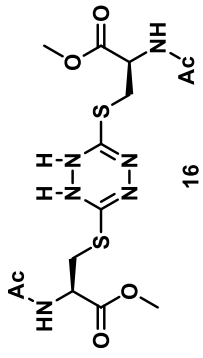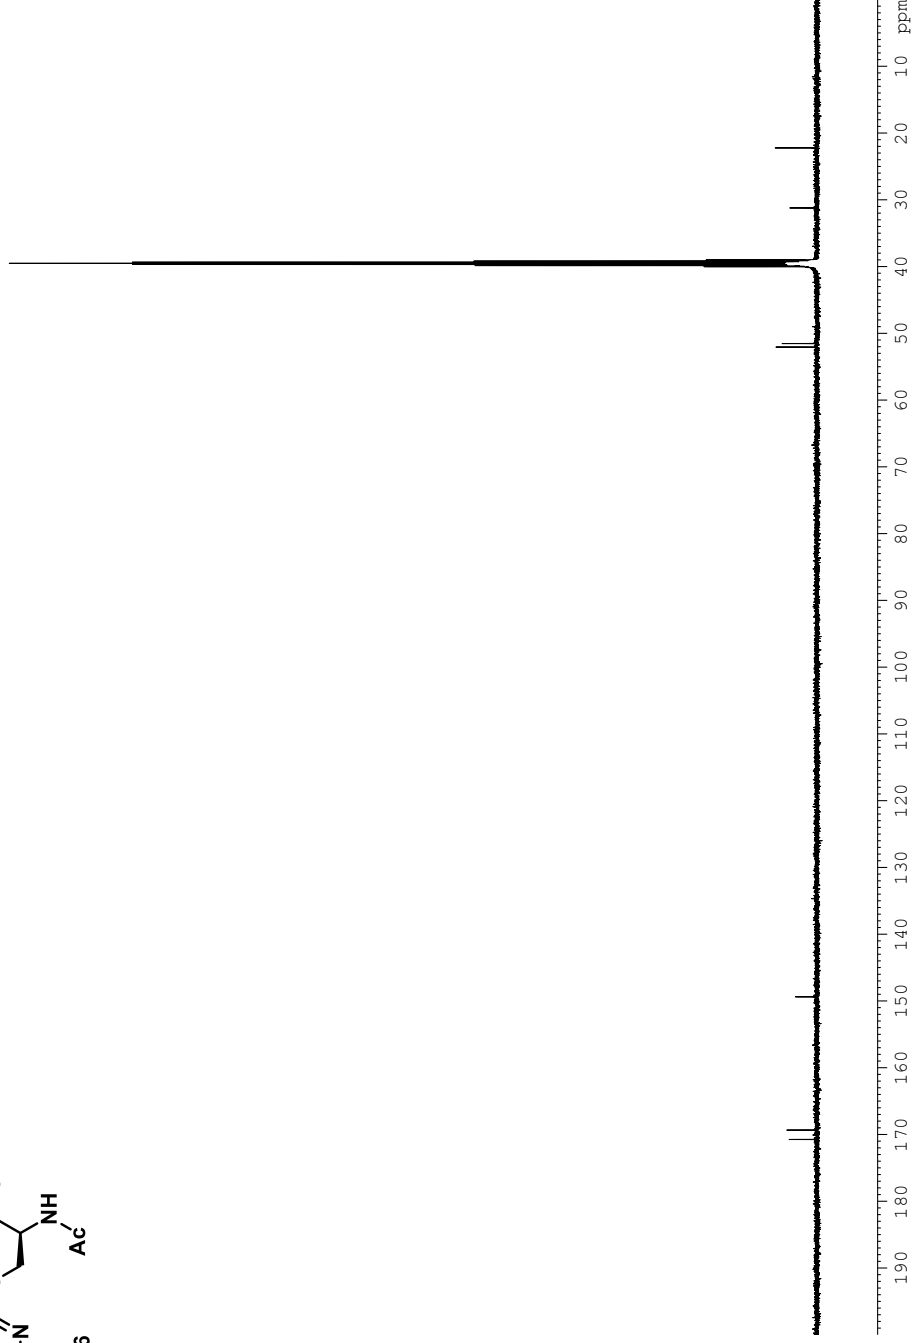



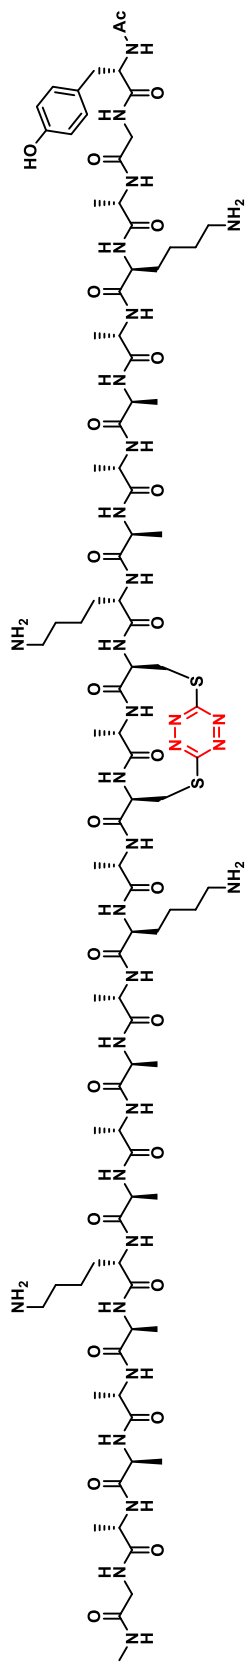

**S,S-Tet-AKA<sub>A10C/A12C</sub>**

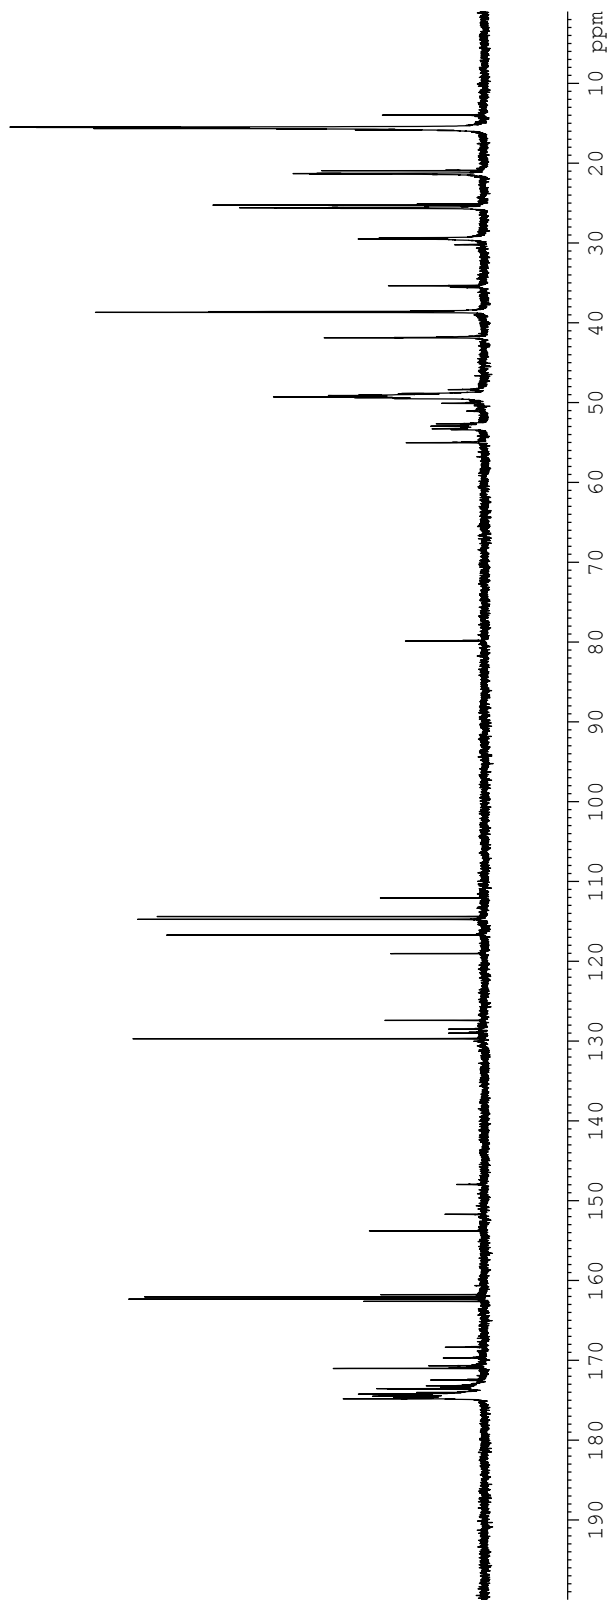

**S,S-Tet-AKA<sub>A10C/A12C</sub> (<sup>13</sup>C NMR, 1:9 D<sub>2</sub>O/H<sub>2</sub>O, 125 MHz)**

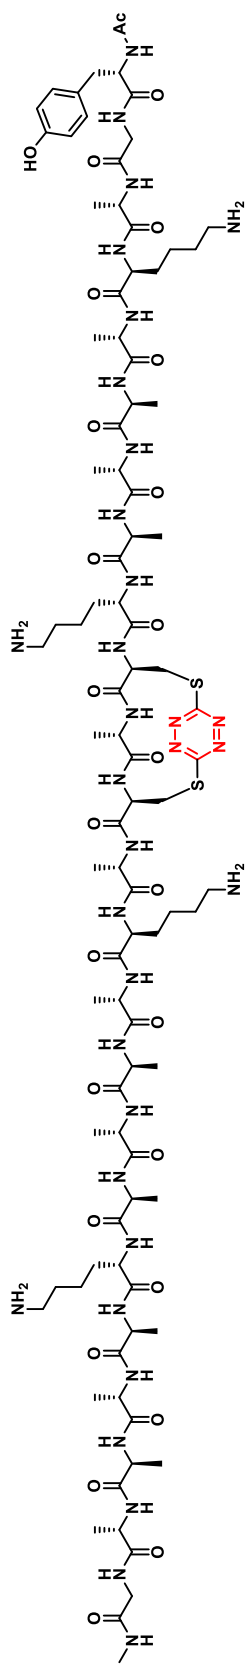

**S,S-Tet-AKA<sub>10C/A12C</sub>**

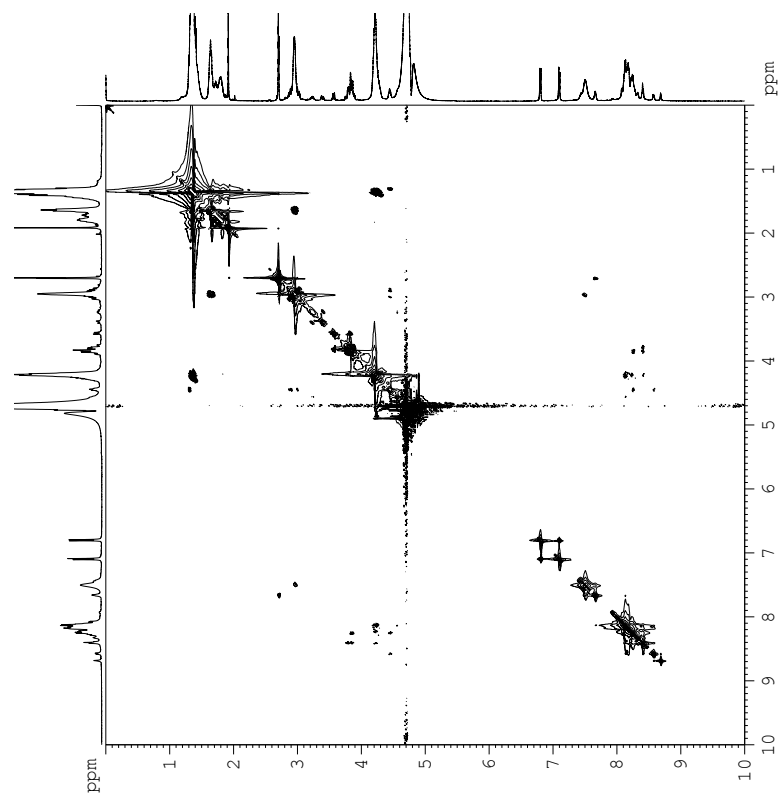

**S,S-Tet-AKA<sub>10C/A12C</sub> (COSY, 1:9 D<sub>2</sub>O/H<sub>2</sub>O)**

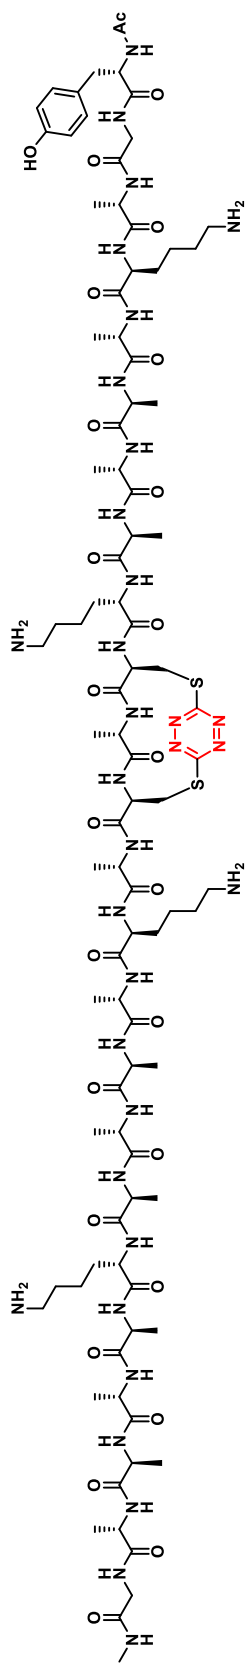

**S,S-Tet-AKA<sub>A10C/A12C</sub>**

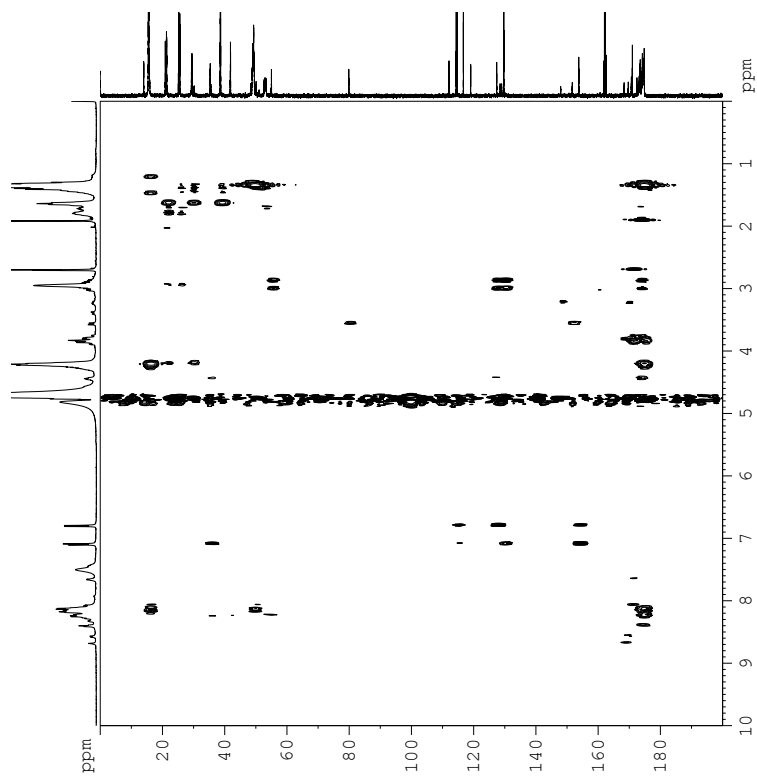

**S,S-Tet-AKA<sub>A10C/A12C</sub> (HMBC, 1:9 D<sub>2</sub>O/H<sub>2</sub>O)**

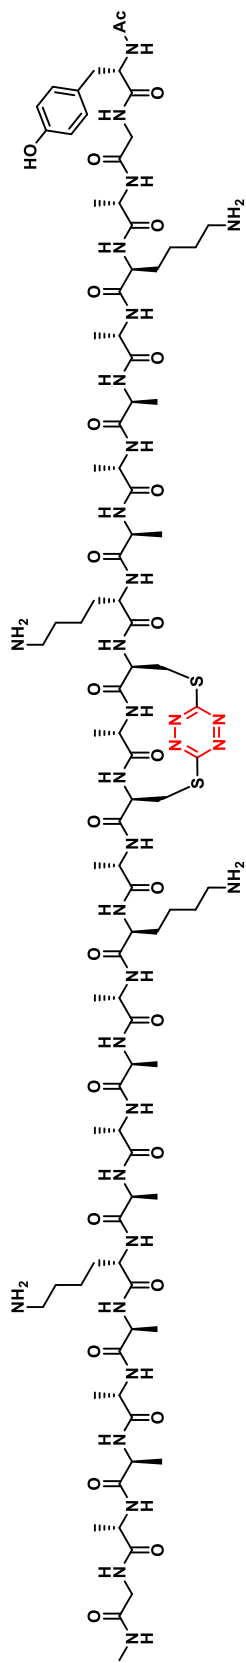

**S,S-Tet-AKA<sub>A10C/A12C</sub>**

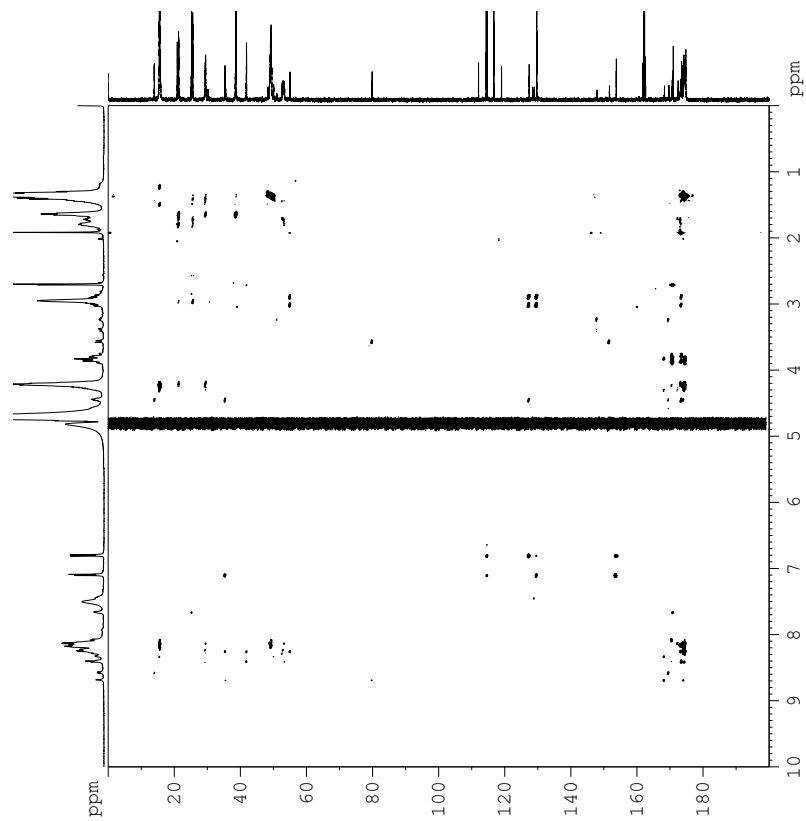

**S,S-Tet-AKA<sub>A10C/A12C</sub> (Long Range HMBC, 1:9 D<sub>2</sub>O/H<sub>2</sub>O)**





**S,S-Tet-AKA<sub>10C/A12C</sub>**

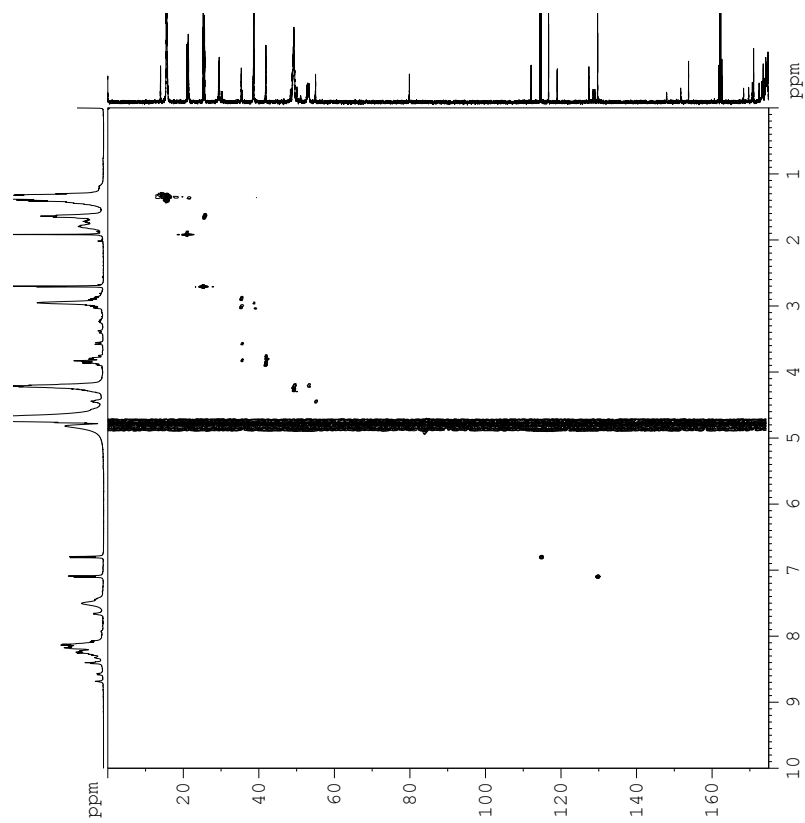

**S,S-Tet-AKA<sub>10C/A12C</sub> (HMQC, 1:9 D<sub>2</sub>O/H<sub>2</sub>O)**
